# Supplementary material for: Asymmetric organocatalytic desymmetrization of 4,4-disubstituted cyclohexadienones at high pressure: a new powerful strategy for the synthesis of highly congested chiral cyclohexenones
Source: Royal Society of Chemistry journal article supplement (doi:10.1039/c4ob00733f), 2014-01-01

**Asymmetric Organocatalytic Desymmetrization of 4,4-Disubstituted  
Cyclohexadienones at High-Pressure: A New Powerful Strategy for the  
Synthesis of Highly Congested Chiral Cyclohexenones**

Naomu Miyamae, Naruhisa Watanabe, Maya Moritaka, Keiji Nakano,  
Yoshiyasu Ichikawa, and Hiyoshizo Kotsuki\*

*Laboratory of Natural Products Chemistry, Faculty of Science, Kochi University,  
Akebono-cho, Kochi 780-8520, Japan  
kotsuki@kochi-u.ac.jp*

**Table of Contents**

|                                                                                      |            |
|--------------------------------------------------------------------------------------|------------|
| <b>1. General</b>                                                                    | <b>S-1</b> |
| <b>2. Experimental Section</b>                                                       | <b>S-1</b> |
| <b>3. References</b>                                                                 | <b>S-4</b> |
| <b>4. <math>^1\text{H}</math> &amp; <math>^{13}\text{C}</math> NMR Spectral Data</b> | <b>S-5</b> |

## General.

All reactions were performed in oven-dried glassware under a positive pressure of nitrogen or argon. All melting points were measured on a Yanagimoto MP-S3 micro-melting point apparatus and are uncorrected. The NMR spectra were recorded on a JEOL ECA-500 (500 MHz for  $^1\text{H}$  NMR analysis and 125.8 MHz for  $^{13}\text{C}$  NMR analysis) instrument in  $\text{CDCl}_3$  unless otherwise stated and are reported in parts per million ( $\delta$ ) downfield from TMS as an internal standard. Mass spectral analyses were performed on a JEOL JMS-700/MStation mass spectrometer. The infrared spectra were measured with a JASCO FTIR-460plus Fourier Transform Infrared Spectrophotometer and are reported in wave-numbers ( $\text{cm}^{-1}$ ). Optical rotations were measured on a JASCO DIP-370 polarimeter. HPLC analyses were carried out using a Hitachi L-6200 HPLC system.

Thin-layer chromatography (TLC) was conducted using Merck Kieselgel 60F-254 plates (0.25 mm). Kanto Chemicals silica gel 60N (spherical, neutral 63–210  $\mu\text{m}$ ) and Merck alumina (90 active, neutral 70–230  $\mu\text{m}$ ) were used for column chromatography.

Catalysts **A** and **B** are known and prepared following the literature procedure.<sup>1</sup> The starting cyclohexenones were prepared from  $\alpha,\alpha'$ -disubstituted acetaldehydes and methyl vinyl ketone via Robinson-type annulation.<sup>2</sup> 4-Methyl-4-trichloromethylcyclohexadienone **1g** was prepared from *p*-cresol following the literature procedure.<sup>3</sup> Cyclohexenone (*R*)-**8** was prepared following the literature procedure,<sup>2</sup> and used after recrystallization from hexane. The ee of this compound was determined by chiral HPLC analysis (Chiralpak AD column, 0.46  $\times$  25 cm, hexane/*i*-PrOH = 99 : 1, 0.3  $\text{cm}^3/\text{min}$ ):  $R_t$  (*S*) = 25.4 min;  $R_t$  (*R*) = 29.2 min (our previous data<sup>2</sup> for the assignment of (*S*)- and (*R*)-isomers should be corrected).

## General Procedure for the Synthesis of Cyclohexadienones (**1**).<sup>4</sup>

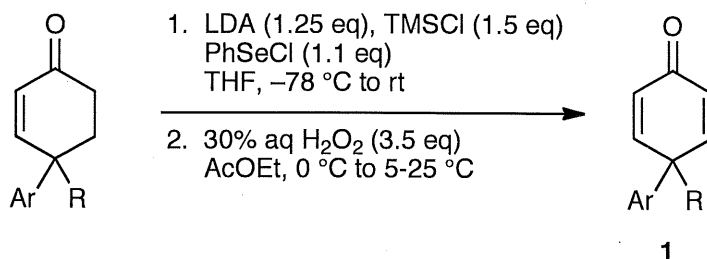

To a solution of *i*-Pr<sub>2</sub>NH (6.25 mmol) in THF (6 mL) was slowly added *n*-BuLi (6.25 mmol) at  $-78\text{ }^{\circ}\text{C}$  under Ar. The mixture was stirred for 20 min before a solution of cyclohexenone (5.0 mmol) in THF (6 mL) was introduced. After stirring at  $0\text{ }^{\circ}\text{C}$  for 30 min, TMSCl (7.5 mmol) was added in one portion and the resulting mixture stirred at rt for 1 h before PhSeCl (5.5 mmol) in THF (5.5 mL) was introduced with stirring at rt. After stirring for 45 min, the mixture was quenched by addition of 10% aq HCl (7.5 mL) followed by stirring for another 1.5 h. The mixture was then extracted with Et<sub>2</sub>O, and the combined extracts were washed with brine, dried ( $\text{Na}_2\text{SO}_4$ ), and concd. Purification by column chromatography on silica gel (hexane/AcOEt) gave the crude product as a pale yellow oil.

To a solution of this crude product (3.3 mmol) in AcOEt (45 mL) was added dropwise 30% aq  $\text{H}_2\text{O}_2$  (3.5 eq) at 0 °C, and the mixture was stirred at 5–25 °C for 60 min. The reaction was quenched by addition of sat. aq  $\text{NaHCO}_3$  (22 mL) and sat. aq  $\text{Na}_2\text{S}_2\text{O}_3$ , and extracted with AcOEt. The combined extracts were dried ( $\text{Na}_2\text{SO}_4$ ) and concd. Purification by column chromatography on alumina (eluted with hexane/AcOEt) and recrystallization from hexane gave the cyclohexadienone **1**.<sup>5</sup>

#### 4-Methyl-4-phenylcyclohexadienone (**1a**).

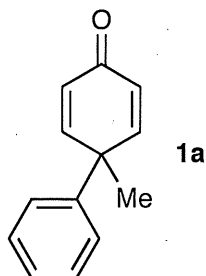

67% yield; colorless solid, mp 53–55 °C (lit.<sup>6</sup> 53–55 °C);  $R_f$  0.36 (hexane / AcOEt = 5 : 1).

FTIR (KBr)  $\nu$  1682, 1666, 1630, 1607, 1450, 1403, 1393, 1364  $\text{cm}^{-1}$ .

$^1\text{H}$  NMR (500 MHz,  $\text{CDCl}_3$ )  $\delta$  1.69 (3H, s), 6.28 (2H, d,  $J$  = 10.0 Hz), 6.92 (2H, d,  $J$  = 10.0 Hz), 7.26–7.36 (5H, m).

$^{13}\text{C}$  NMR (125.8 MHz,  $\text{CDCl}_3$ )  $\delta$  23.80, 44.95, 126.28 ( $\times 2$ ), 126.90 ( $\times 2$ ), 127.53, 128.92 ( $\times 2$ ), 139.80, 155.37 ( $\times 2$ ), 185.85.

#### 4-Ethyl-4-phenylcyclohexadienone (**1b**).

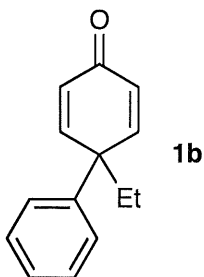

50% yield; colorless solid, mp 43–45 °C;  $R_f$  0.27 (hexane / AcOEt = 5 : 1).

FTIR (KBr)  $\nu$  1665, 1626, 1595, 1489, 1456, 1444, 1398  $\text{cm}^{-1}$ .

$^1\text{H}$  NMR (500 MHz,  $\text{CDCl}_3$ )  $\delta$  0.89 (3H, t,  $J$  = 7.5 Hz), 2.16 (2H, q,  $J$  = 7.5 Hz), 6.36 (2H, d,  $J$  = 10.5 Hz), 6.87 (2H, d,  $J$  = 10.5 Hz), 7.24–7.35 (5H, m).

$^{13}\text{C}$  NMR (125.8 MHz,  $\text{CDCl}_3$ )  $\delta$  8.89, 30.08, 49.44, 126.50 ( $\times 2$ ), 127.41, 128.71 ( $\times 2$ ), 128.88 ( $\times 2$ ), 139.93, 154.10 ( $\times 2$ ), 186.13.

#### 4-Methyl-4-(4-methoxyphenyl)cyclohexadienone (**1c**).

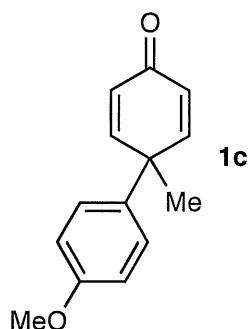

35% yield; colorless solid, mp 55–57 °C;  $R_f$  0.16 (hexane / AcOEt = 5 : 1).

FTIR (KBr)  $\nu$  1666, 1624, 1607, 1509, 1458, 1401  $\text{cm}^{-1}$ .

$^1\text{H}$  NMR (500 MHz,  $\text{CDCl}_3$ )  $\delta$  1.65 (3H, s), 3.78 (3H, s), 6.24 (2H, d,  $J$  = 10.0 Hz), 6.85–6.87 (2H, m), 6.88 (2H, d,  $J$  = 10.0 Hz), 7.19–7.21 (2H, m).

$^{13}\text{C}$  NMR (125.8 MHz,  $\text{CDCl}_3$ )  $\delta$  23.83, 44.32, 55.22, 114.22 ( $\times 2$ ), 126.57 ( $\times 2$ ), 127.38 ( $\times 2$ ), 131.46, 155.66 ( $\times 2$ ), 158.86, 185.85.

**4-Methyl-4-(4-bromophenyl)cyclohexadienone (1d).**

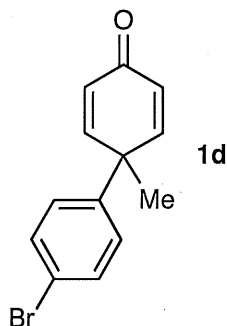

45% yield; colorless solid, mp 59–60 °C;  $R_f$  0.19 (hexane / AcOEt = 5 : 1).

FTIR (KBr)  $\nu$  1661, 1619, 1591, 1508, 1448, 1391  $\text{cm}^{-1}$ .

$^1\text{H}$  NMR (500 MHz,  $\text{CDCl}_3$ )  $\delta$  1.67 (3H, s), 6.27 (2H, d,  $J$  = 10.0 Hz), 6.86 (2H, d,  $J$  = 10.0 Hz), 7.15–7.17 (2H, m), 7.46 (2H, d,  $J$  = 8.5 Hz).

$^{13}\text{C}$  NMR (125.8 MHz,  $\text{CDCl}_3$ )  $\delta$  23.82, 44.56, 121.66, 127.21 ( $\times 2$ ), 128.11 ( $\times 2$ ), 132.02 ( $\times 2$ ), 139.02, 154.58 ( $\times 2$ ), 185.52.

HRMS Calcd for  $\text{C}_{13}\text{H}_{11}\text{BrO} + \text{H}$  263.0072, found 263.0077.

**4-Methyl-4-(4,4'-biphenyl)cyclohexadienone (1e).**

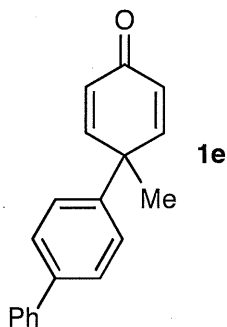

15% yield; colorless solid, mp 111–113 °C;  $R_f$  0.20 (hexane / AcOEt = 5 : 1).

FTIR (KBr)  $\nu$  1665, 1622, 1597, 1484, 1448, 1398  $\text{cm}^{-1}$ .

$^1\text{H}$  NMR (500 MHz,  $\text{CDCl}_3$ )  $\delta$  1.74 (3H, s), 6.32 (2H, d,  $J = 10.0$  Hz), 6.96 (2H, d,  $J = 10.0$  Hz), 7.35–7.39 (3H, m), 7.45 (2H, t,  $J = 7.5$  Hz), 7.57 (4H, dd,  $J = 7.5, 5.5$  Hz).

$^{13}\text{C}$  NMR (125.8 MHz,  $\text{CDCl}_3$ )  $\delta$  23.90, 44.79, 126.77 ( $\times 2$ ), 127.00 ( $\times 2$ ), 127.06 ( $\times 2$ ), 127.50, 127.65 ( $\times 2$ ), 128.80 ( $\times 2$ ), 138.81, 140.25, 140.56, 155.25 ( $\times 2$ ), 185.85.

HRMS Calcd for  $\text{C}_{19}\text{H}_{16}\text{O} + \text{H}$  261.1279, found 261.1282.

**3',4'-Dihydro-2'H-spiro[cyclohexa[2,5]diene-1,1'-naphthalen]-4-one.**

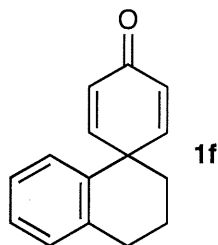

86% yield; colorless solid; mp 150–151  $^{\circ}\text{C}$  (lit.<sup>7</sup> 144–146  $^{\circ}\text{C}$ );  $R_f$  0.26 (hexane / AcOEt = 5 : 1).

FTIR (KBr)  $\nu$  1662, 1621, 1487, 1445, 1400  $\text{cm}^{-1}$ .

$^1\text{H}$  NMR (500 MHz,  $\text{CDCl}_3$ )  $\delta$  1.97–2.02 (4H, m), 2.91–2.93 (2H, m), 6.28 (2H, d,  $J = 10.0$  Hz), 6.95 (1H, d,  $J = 8.0$  Hz), 7.02 (2H, d,  $J = 10.0$  Hz), 7.07–7.11 (1H, m), 7.16–7.17 (2H, m).

$^{13}\text{C}$  NMR (125.8 MHz,  $\text{CDCl}_3$ )  $\delta$  19.23, 29.58, 34.21, 44.74, 126.34, 126.79 ( $\times 2$ ), 127.49, 128.79, 130.23, 133.39, 136.46, 155.31 ( $\times 2$ ), 186.16.

**References**

- (1) M. Moritaka, N. Miyamae, K. Nakano, Y. Ichikawa and H. Kotsuki, *Synlett*, 2012, **23**, 2554–2558.
- (2) Y. Inokoishi, N. Sasakura, K. Nakano, Y. Ichikawa and H. Kotsuki, *Org. Lett.*, 2010, **12**, 1616–1619.
- (3) (a) Z. Wang, *Comprehensive Organic Name Reactions and Reagents*, John Wiley & Sons: New York, 2010; Vol. 3, pp 3178–3182; (b) M. S. Newman and A. G. Pinkus, *J. Org. Chem.*, 1954, **19**, 978–984.
- (4) (a) H. Plieninger and W. Gramlich, *Chem. Ber.*, 1978, **111**, 1944–1957; (b) D. Crich, Q. Yao and G. F. Filzen, *J. Am. Chem. Soc.*, 1995, **117**, 11455–11470.
- (5) Yields were not optimized.
- (6) H. E. Zimmerman and G. Jones, II, *J. Am. Chem. Soc.*, 1970, **92**, 2753–2761.
- (7) S. Rousseaux, J. García-Fortanet, M. A. D. A. Sanchez and S. L. Buchwald, *J. Am. Chem. Soc.*, 2011, **133**, 9282–9285.

DFILE cyclohexadienone-2\_proton-1-1.als  
COMNT single\_pulse  
DATIM 2013-12-17 10:09:54  
OBNUC 1H  
EXMOD proton.jxp  
OBFRQ 500.16 MHz  
OBSET 2.41 KHz  
OBFIN 6.01 Hz  
POINT 13120  
FREQU 7507.51 Hz  
SCANS 8  
AQTIM 1.7459 sec  
PD 5.0000 sec  
PW1 4.68 usec  
IRNUC 1H  
CTEMP 18.3 c  
SLVNT CDCL3  
EXREF 7.26 ppm  
BF 0.12 Hz  
RGAIN 34

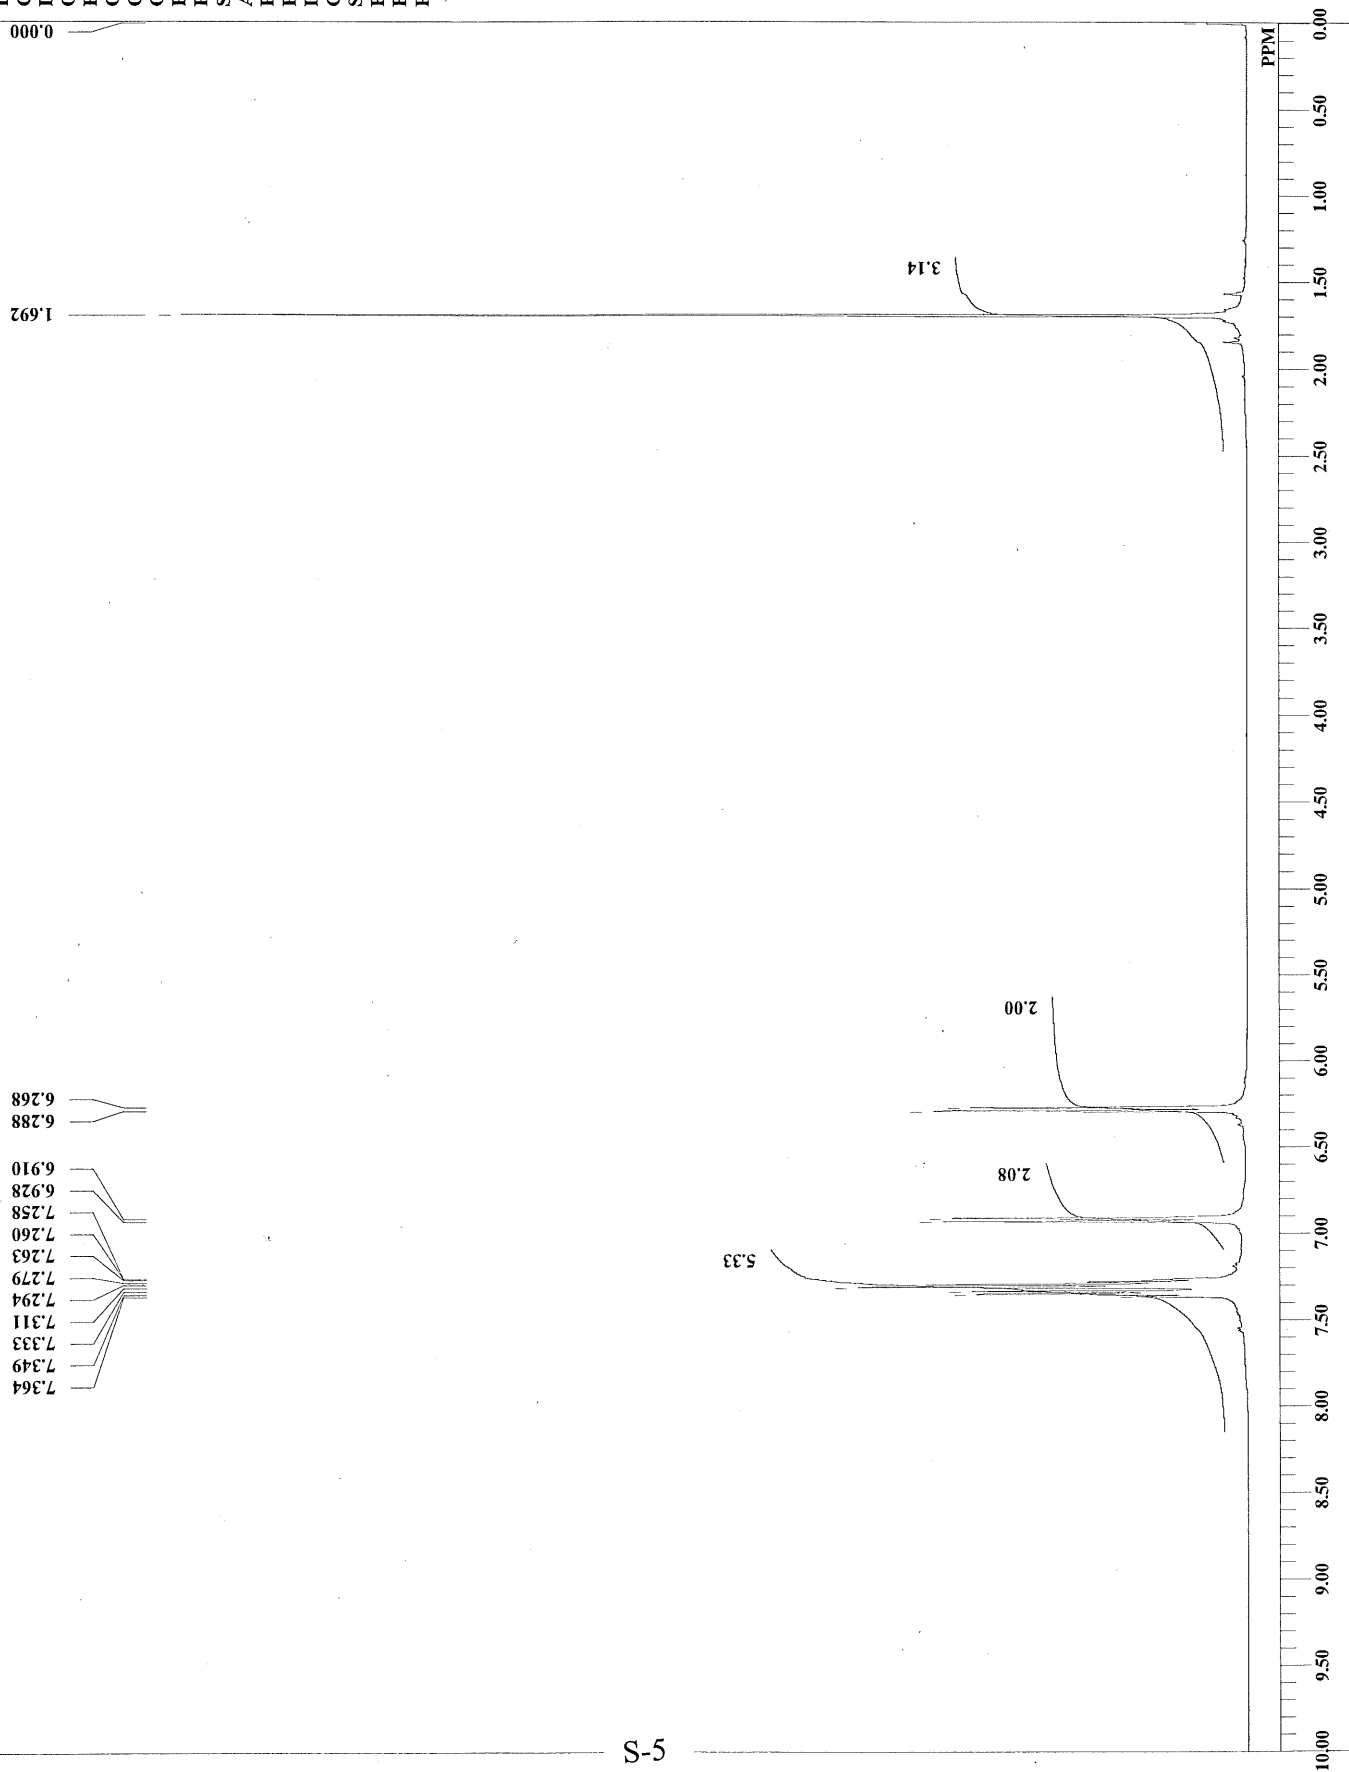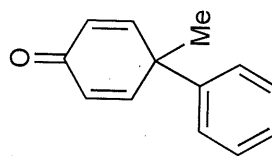

**1a**  
<sup>1</sup>H NMR  
(500 MHz, CDCl<sub>3</sub>)

C:\DOCUME~1\ADMINI~1\WINLOCALS~1\Temp\ffftp1840\cyclohexadienone-2\_carbon-1-1.als

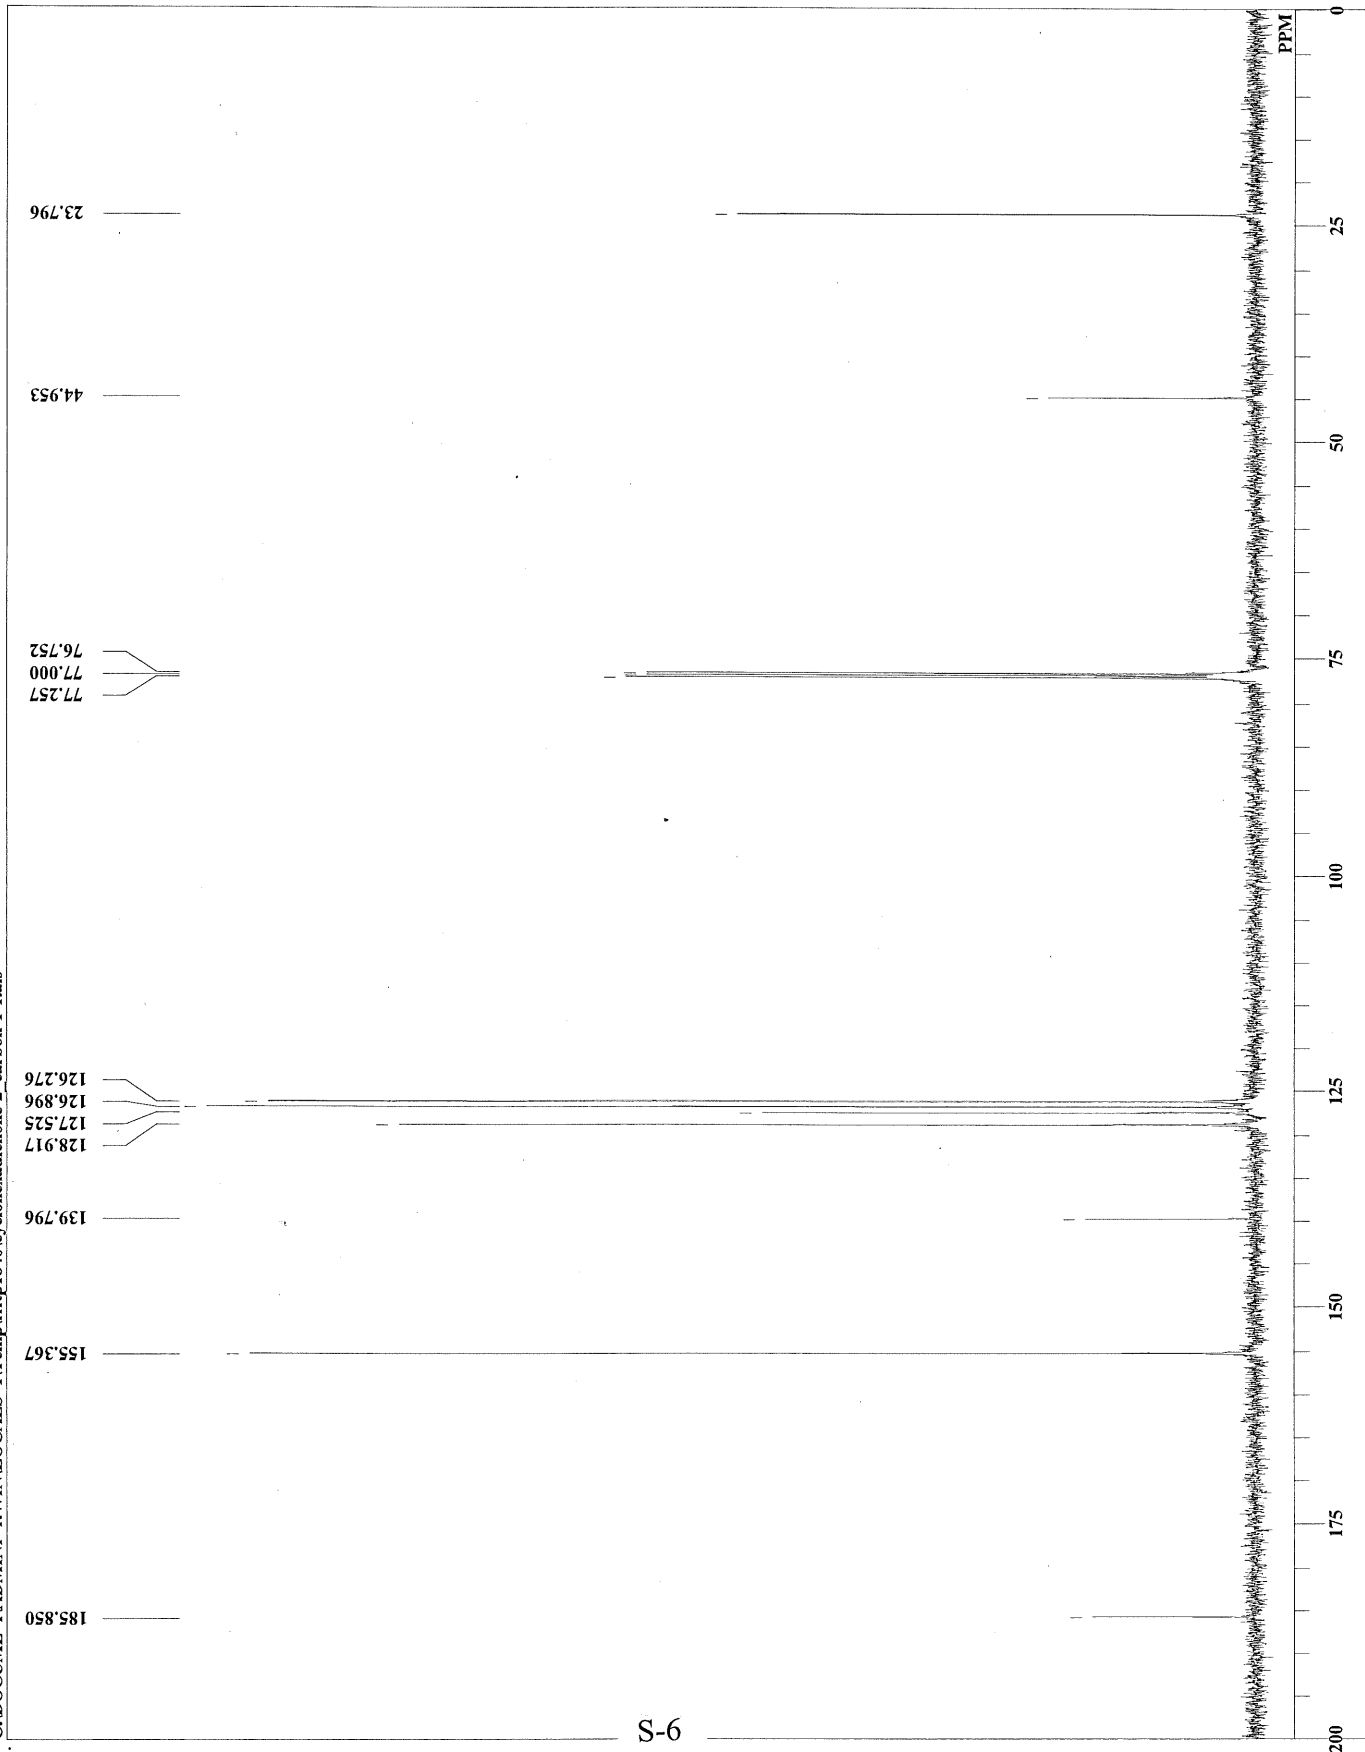

DFILE  
COMNT  
DATIM  
OBNUC  
EXMOD  
OBFRO  
OBSET  
OBFIN  
POINT  
FREQU  
SCANS  
ACQIM  
PD  
PWI  
IRNUC  
CTEMP  
SLVNT  
EXREF  
BF  
RGAIN

cyclohexadienone-2\_carbon-1-1.als  
single pulse decoupled gated NOE  
2013-12-17 10:22:53  
13C  
carbon.jpg  
125.77 MHz  
7.87 KHz  
4.21 Hz  
26224  
31446.54 Hz  
64  
0.8336 sec  
2.0000 sec  
2.72 usec  
1H  
19.3 c  
CDCL3  
77.00 ppm  
0.12 Hz  
60

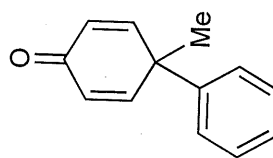

**1a**  
<sup>13</sup>C NMR  
(125 MHz, CDCl<sub>3</sub>)

DFILE  
COMNT  
DATIM  
OBNUC  
EXMOD  
OBFRO  
OBFET  
OBFIN  
POINT  
FREQU  
SCANS  
ACQTM  
PD  
PWI  
IRNUC  
CTEMP  
SLVNT  
EXREF  
BF  
RGAIN

NAO-232\_proton-1-1.als  
single\_pulse  
2012-08-29 14:40:50  
1H  
proton.jpg  
500.16 MHz  
2.41 KHz  
6.01 Hz  
13120  
7507.51 Hz  
8  
1.7459 sec  
5.0000 sec  
4.68 usec  
1H  
21.7 c  
CDCL3  
7.26 ppm  
0.12 Hz  
30

2.181  
2.167  
2.152  
2.137

7.350  
7.347  
7.334  
7.321  
7.311  
7.308  
7.294  
7.274  
7.270  
7.260  
7.250  
7.246  
7.243  
6.880  
6.861  
6.855  
6.370  
6.349

0.908  
0.893  
0.878

5.35

2.00

2.07

2.20

3.17

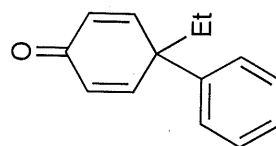

**1b**  
<sup>1</sup>H NMR  
(500 MHz, CDCl<sub>3</sub>)

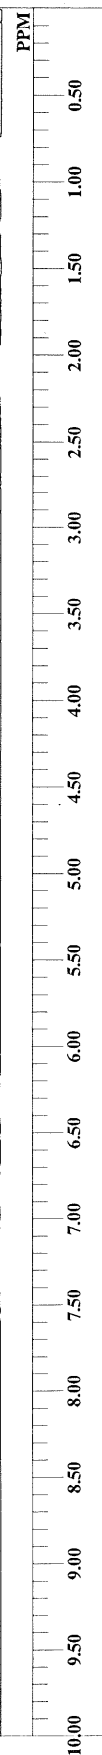

C:\DOCUME~1\ADMINI~1\WINLOCALS~1\Temp\ffftp1988\NAO-232\_Carbon-1-1.als

DFILE  
COMNT  
DATIM  
OBNUC  
EXMOD  
OBFRO  
OBSET  
OBFIN  
POINT  
FREQU  
SCANS  
ACQIM  
PD  
PW1  
IRNUC  
CTEMP  
SLVNT  
EXREF  
BF  
RGAIN

NAO-232\_Carbon-1-1.als  
single pulse decoupled gated NOE  
2012-08-29 14:48:18  
13C  
carbon.jpg  
125.77 MHz  
7.87 KHz  
4.21 Hz  
26224  
31446.54 Hz  
512  
0.8336 sec  
2.0000 sec  
2.72 usec  
1H  
22.2 c  
CDCL3  
77.00 ppm  
0.12 Hz  
60

186.126  
154.099  
139.930  
129.546  
128.879  
128.707  
127.411  
126.495  
126.333  
76.743  
77.257  
77.000  
49.435  
30.079  
8.893

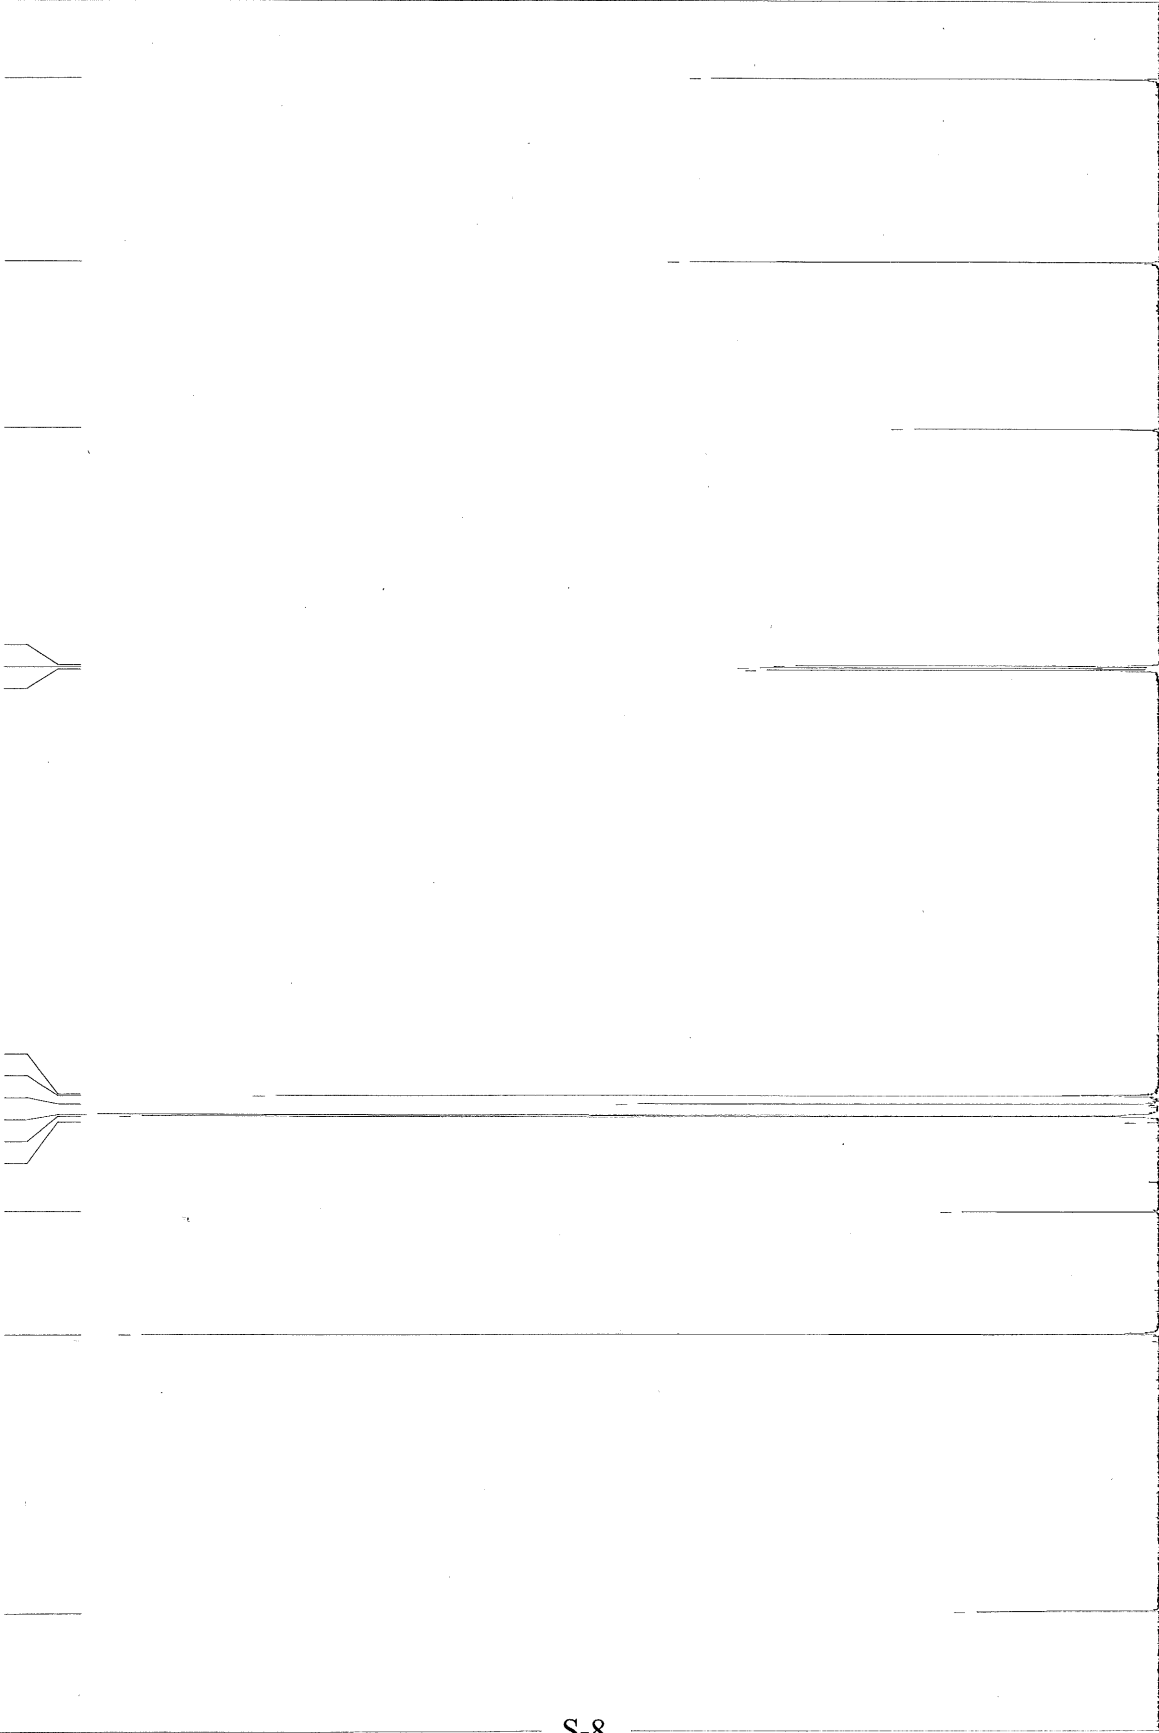

PPM  
200  
175  
150  
125  
100  
75  
50  
25

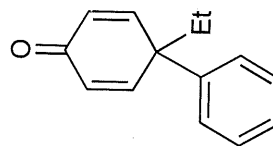

**1b**  
<sup>13</sup>C NMR  
(125 MHz, CDCl<sub>3</sub>)

DFILE  
COMNT  
DATIM  
OBNUC  
EXMOD  
OBRFQ  
OBSET  
OBFIN  
POINT  
FREQU  
SCANS  
ACQTM  
PD  
PWI  
IRNUC  
CTEMP  
SLVNT  
EXREF  
BF  
RGAIN

NAO-244\_proton-1-1.als  
single\_pulse  
2012-08-08 00:10:17  
1H  
proton-jxp  
500.16 MHz  
2.41 KHz  
6.01 Hz  
13120  
7507.51 Hz  
8  
1.7459 sec  
5.0000 sec  
4.68 usec  
1H  
23.6 c  
CDCL3  
7.26 ppm  
0.12 Hz  
30

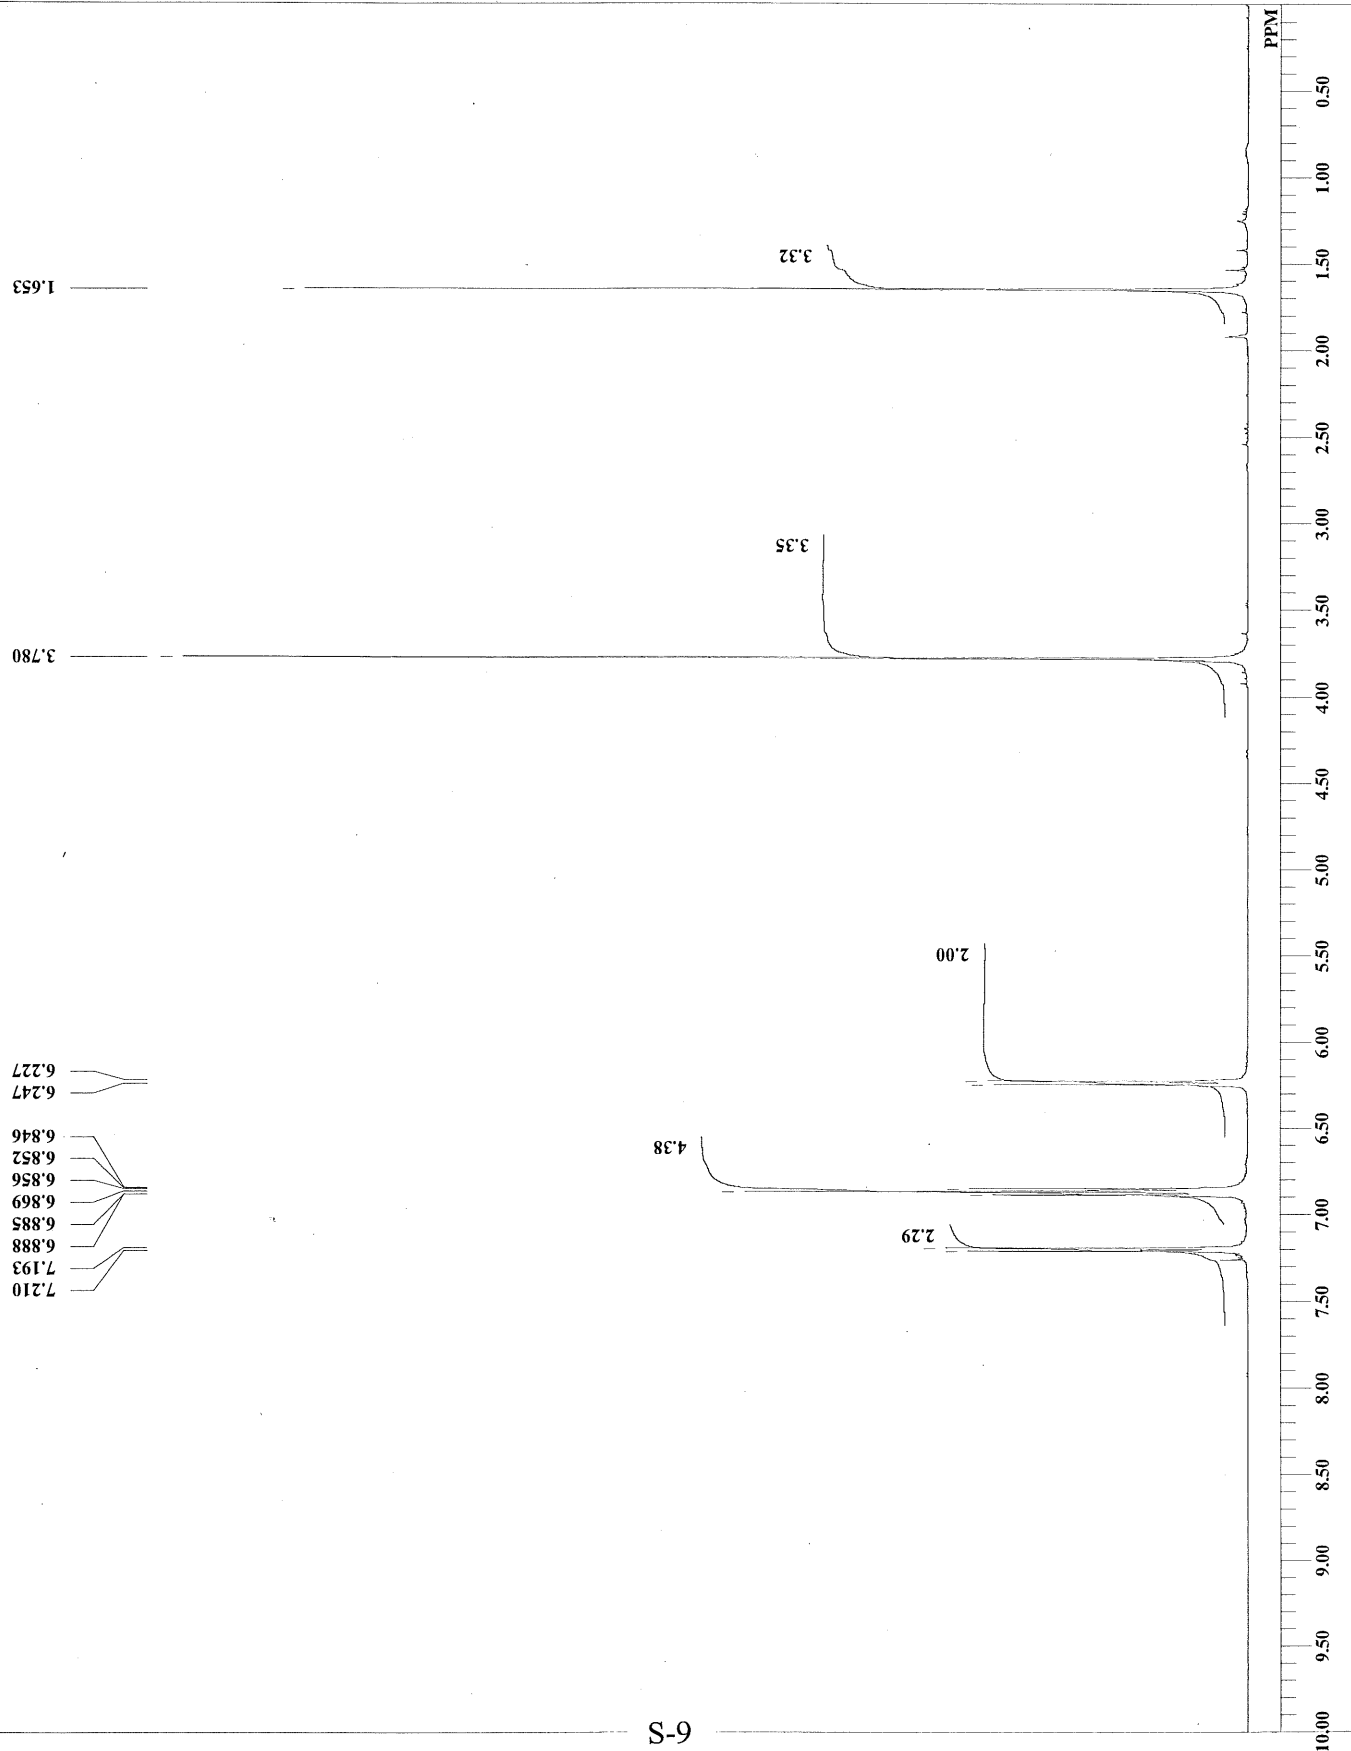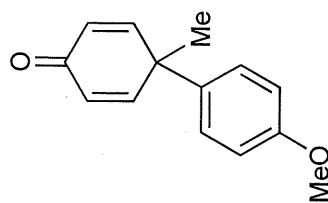

C:\DOCUME~1\ADMINI~1\WINLOCALS~1\Temp\ffftp1988\NAO-244 Carbon-1-1.als

DFILE  
 COMNT  
 DATIM  
 OBNUC  
 EXMOD  
 OBFRQ  
 OBSET  
 OBFIN  
 POINT  
 FREQU  
 SCANS  
 ACQTM  
 PD  
 PW1  
 IRNUC  
 CTMP  
 SLVNT  
 EXREF  
 BF  
 RGAIN

NAO-244 Carbon-1-1.als  
 single pulse decoupled gated NOE  
 2012-08-08 00:17:49  
 13C  
 carbon.jpg  
 125.77 MHz  
 7.87 KHz  
 4.21 Hz  
 26224  
 31446.54 Hz  
 256  
 0.8336 sec  
 2.0000 sec  
 2.72 usec  
 1H  
 23.9 c  
 CDCL3  
 77.00 ppm  
 0.12 Hz  
 58

23.834

44.315

55.222

76.752

77.257

77.000

114.224

126.572

127.382

131.463

155.662

158.857

185.850

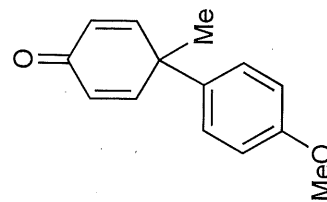

<sup>13</sup>C NMR  
 (125 MHz, CDCl<sub>3</sub>)

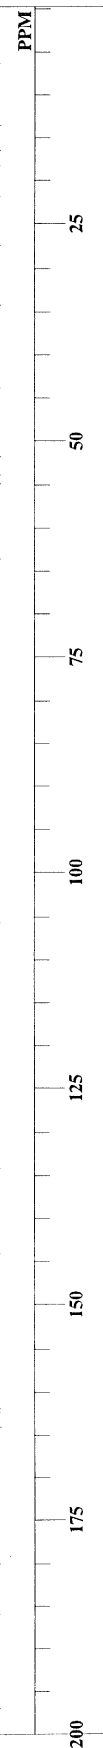

C:\DOCUME~1\ADMINI~1\WINLOCALS~1\Temp\ffftp1988\NAR-31\_proton-1-1.als

DFILE NAR-31\_proton-1-1.als  
COMNT single\_pulse  
DATIM 2012-08-09 23:37:01  
OBNUC 1H  
EXMOD proton.jpg  
OBFREQ 500.16 MHz  
OBSET 2.41 KHz  
OBFIN 6.01 Hz  
POINT 13120  
FREQU 7507.51 Hz  
SCANS 8  
ACQTM 1.7459 sec  
PD 5.0000 sec  
PW1 4.68 usec  
IRNUC 1H  
CTEMP 23.0 c  
SLVNT CDCL3  
EXREF 12.51 ppm  
BF 0.12 Hz  
RGAIN 38

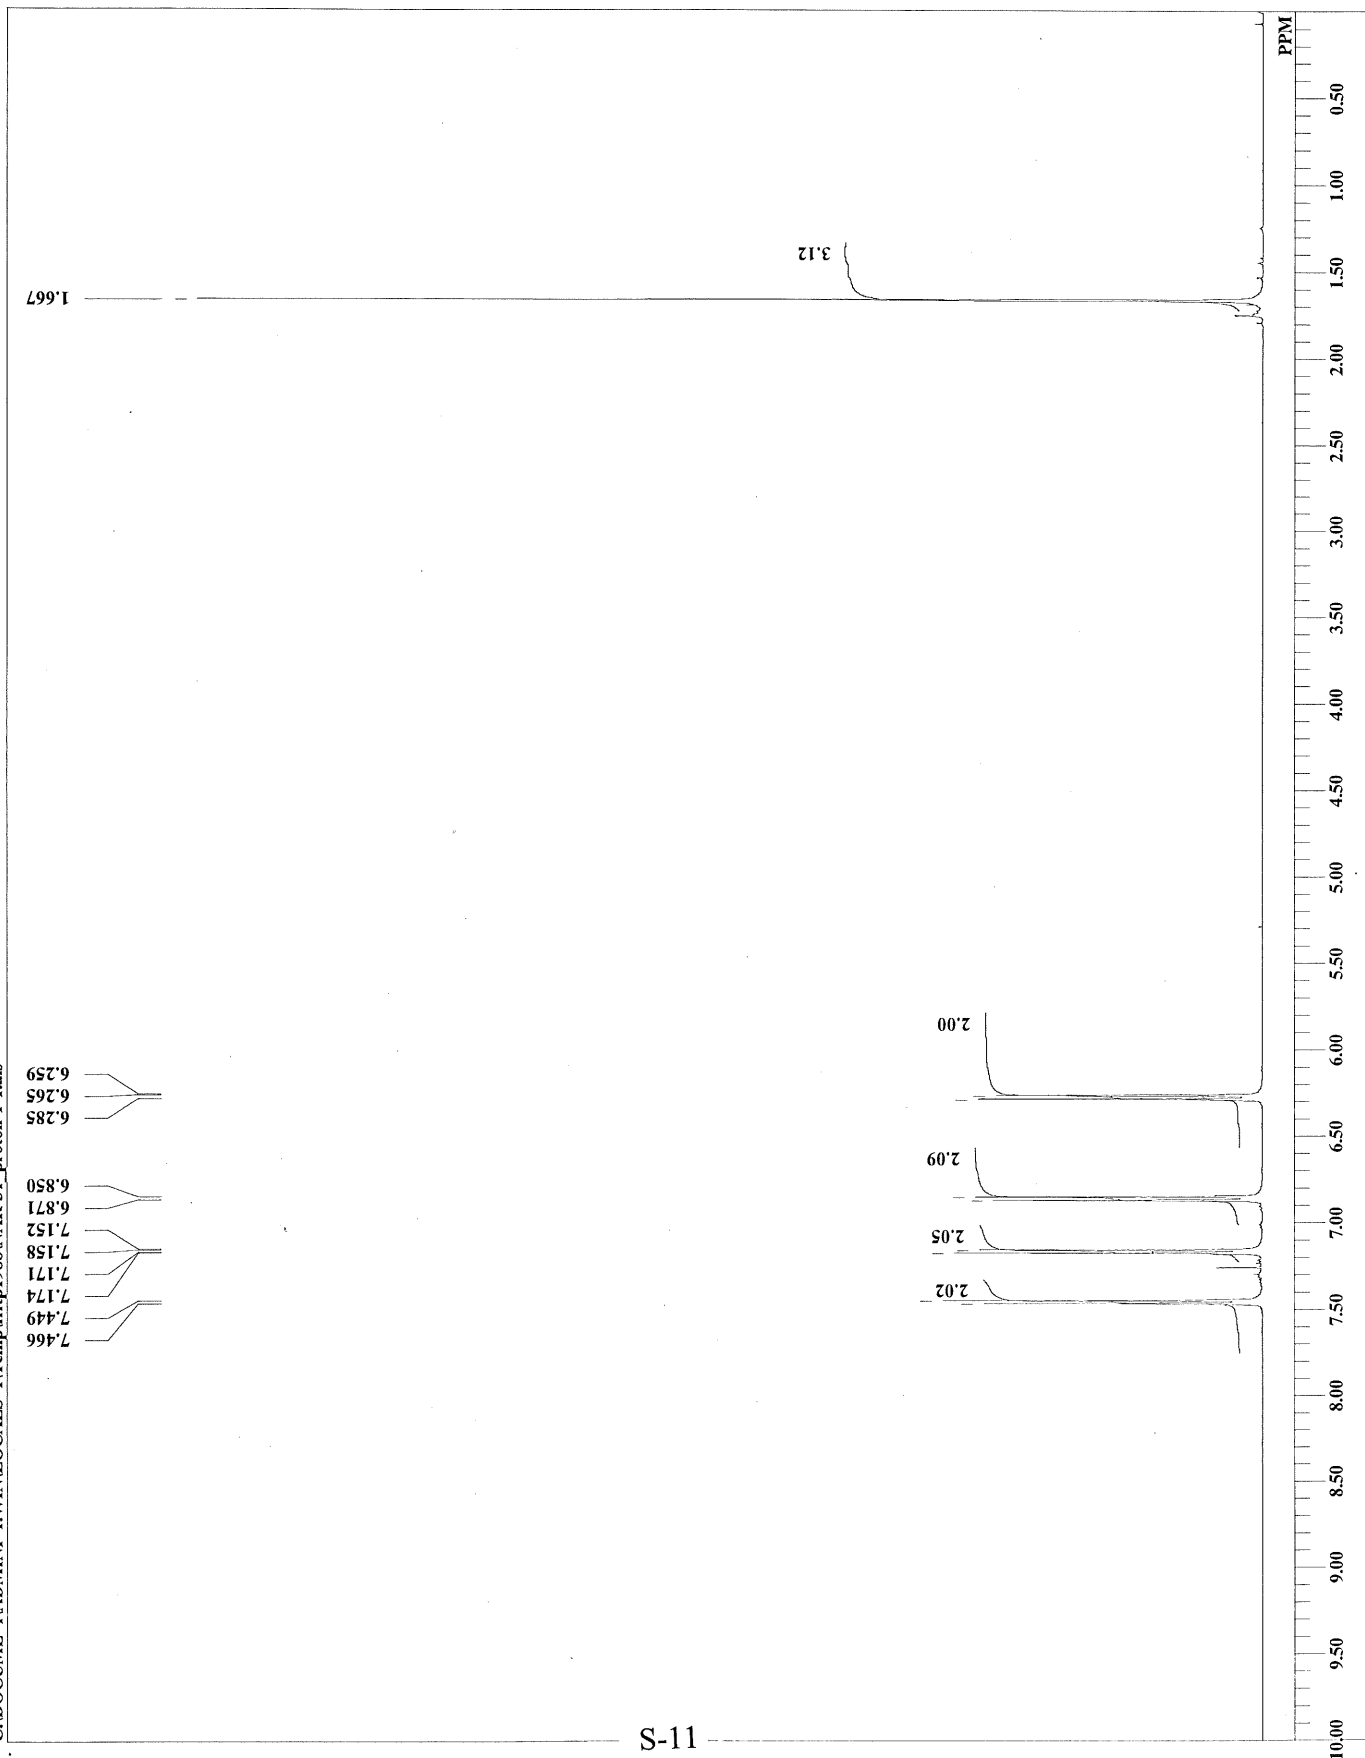

C:\DOCUME~1\ADMINI~1\WINLOCALS~1\Temp\ffftp1988\NAR-31\_Carbon-1-1.als

DFILE  
COMNT  
DATIM  
OBNUC  
EXMOD  
OBFRO  
OBSET  
OBFIN  
POINT  
FREQU  
SCANS  
ACQTM  
PD  
PW1  
IRNUC  
CTEMP  
SLVNT  
EXREF  
BF  
RGAIN

NAR-31\_Carbon-1-1.als  
single pulse decoupled gated NOE  
2012-08-09 23:46:07  
13C  
carbon.jpg  
125.77 MHz  
7.87 KHz  
4.21 Hz  
26224  
31446.54 Hz  
512  
0.8336 sec  
2.0000 sec  
2.72 usec  
1H  
23.4 c  
CDCL3  
77.00 ppm  
0.12 Hz  
58

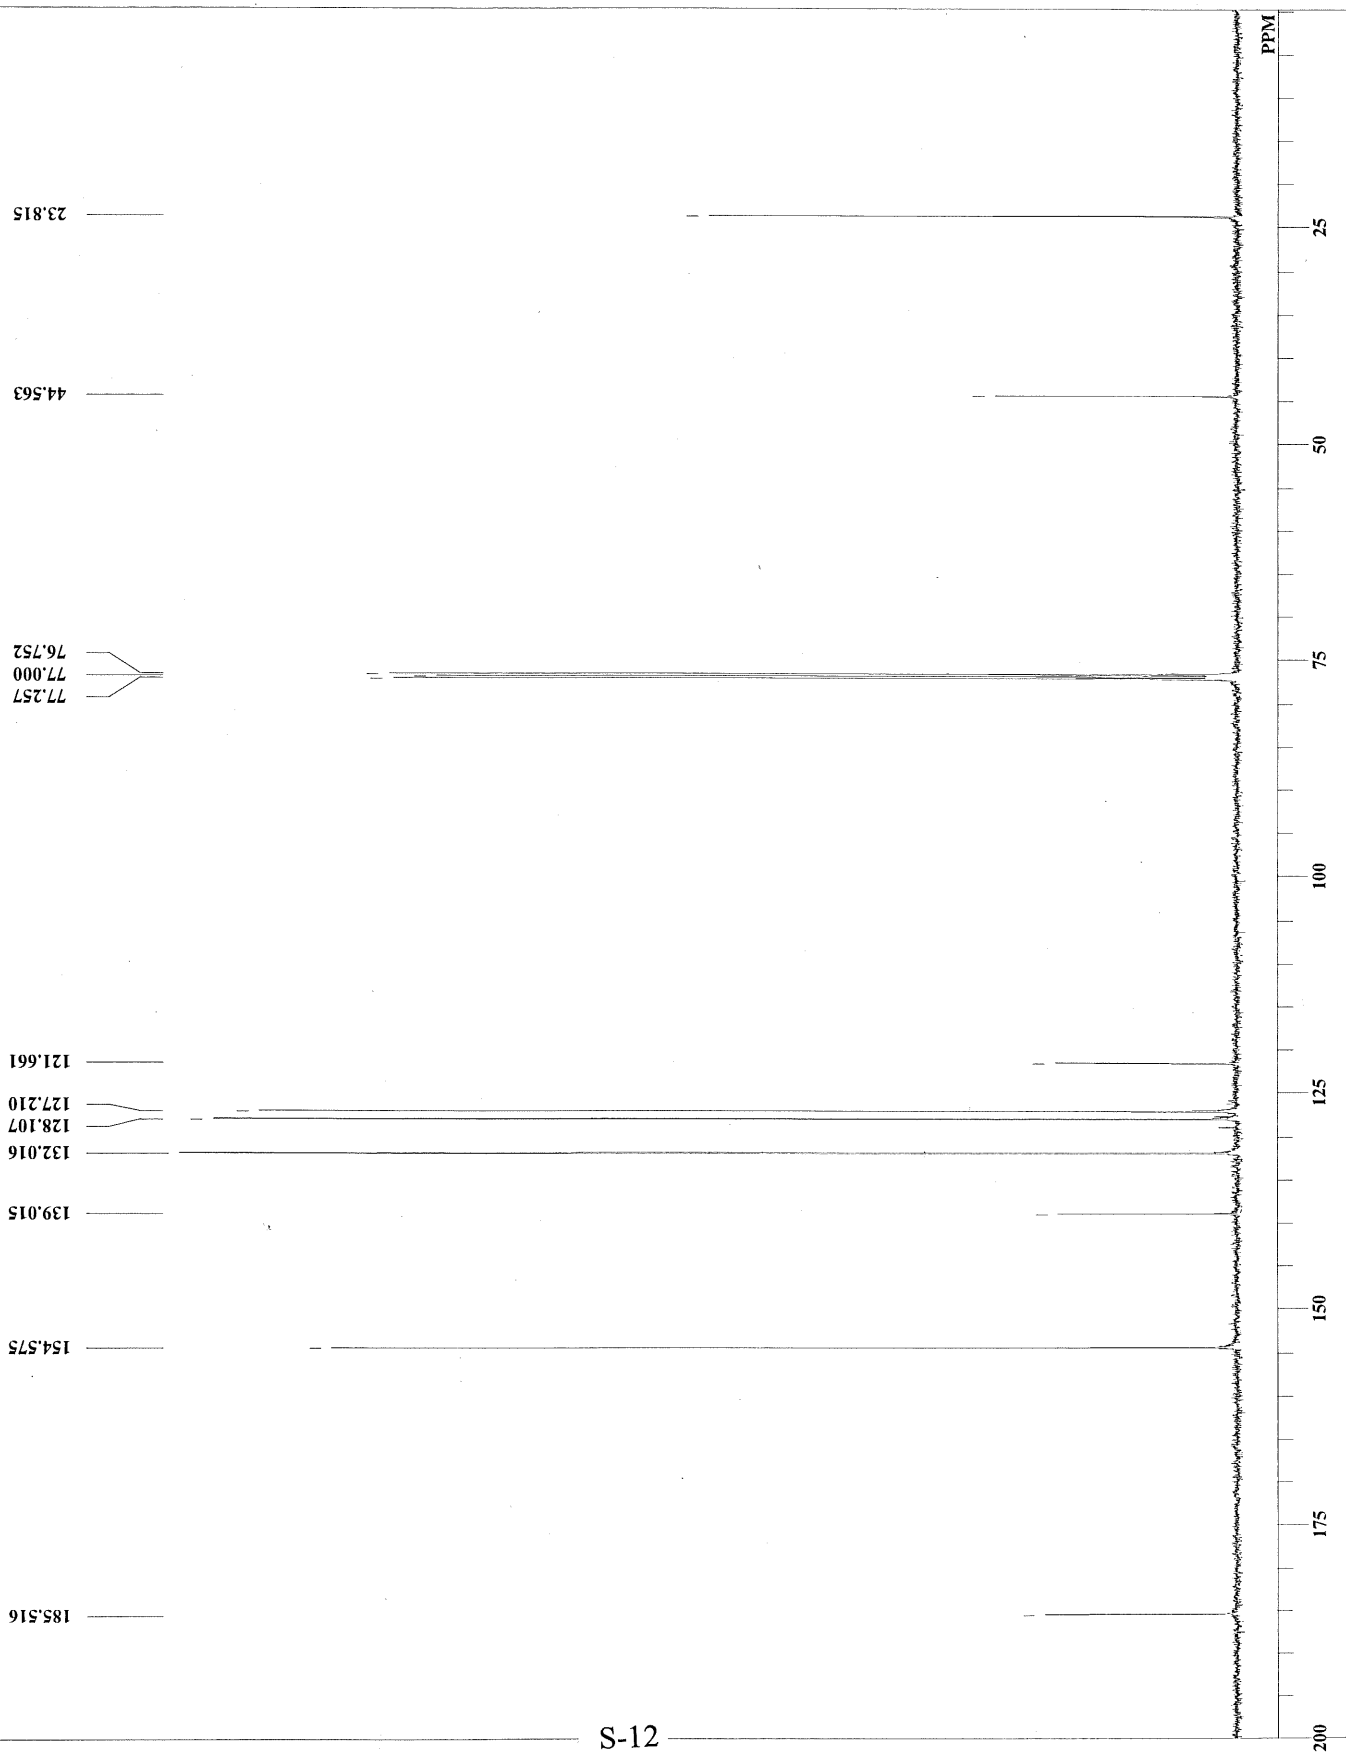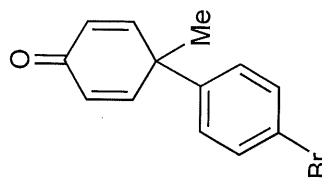

1d  
13C NMR  
(125 MHz, CDCl<sub>3</sub>)

C:\DOCUMENT-1\ADMINI-1\WINLOCALS-1\Temp\ffftp1840\NAO-247\_proton-1-1.als

DFILE NAO-247\_proton-1-1.als  
COMNT single\_pulse  
DATIM 2012-07-31 20:04:37  
OBNUC 1H  
EXMOD proton.jxp  
OBFRQ 500.16 MHz  
OBSET 2.41 KHz  
OBFIN 6.01 Hz  
POINT 13120  
FREQU 7507.51 Hz  
SCANS 8  
ACQTM 1.7459 sec  
PD 5.0000 sec  
PWI 4.68 usec  
IRNUC 1H  
CTEMP 23.1 c  
SLVNT CDCL3  
EXREF 7.26 ppm  
BF 0.12 Hz  
RGAIN 40

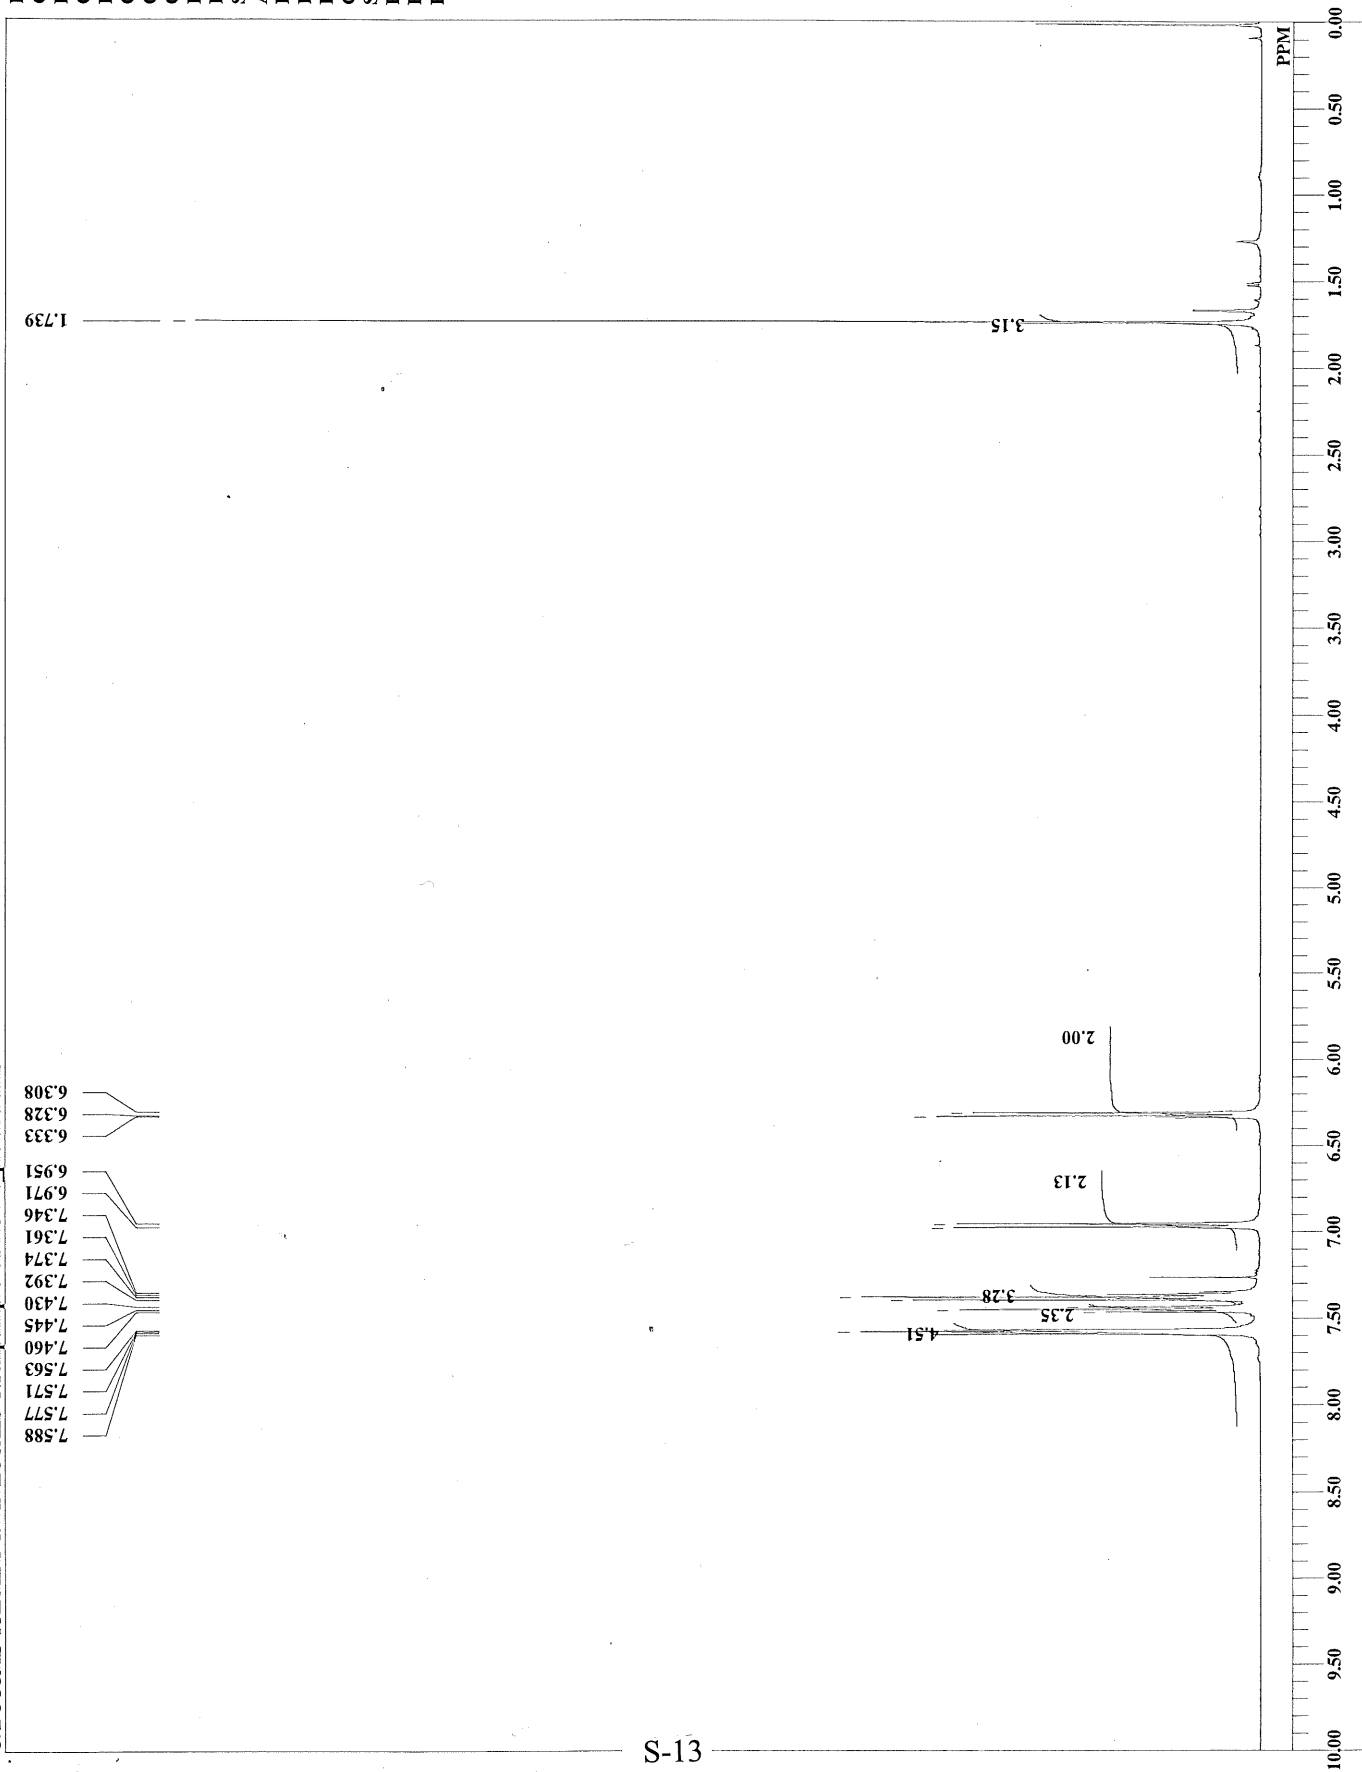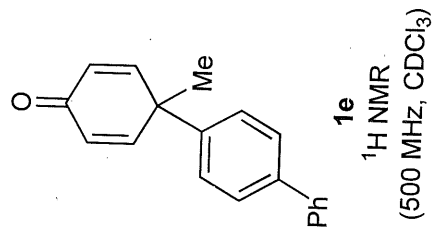

C:\DOCUME~1\ADMINI~1\WINLOCALS~1\Temp\ffftp1988\NAO-247\_Carbon-1-1.als

DFILE  
COMNT  
DATIM  
OBNUC  
EXMOD  
OBFRO  
OBSET  
OBFIN  
POINT  
FREQU  
SCANS  
ACQIM  
PD  
PWI  
IRNUC  
CTEMP  
SLVNT  
EXREF  
BF  
RGAIN

NAO-247\_Carbon-1-1.als  
single pulse decoupled gated NOE  
2012-07-31 20:12:15  
13C  
carbon.jpg  
125.77 MHz  
7.87 KHz  
4.21 Hz  
26224  
31446.54 Hz  
512  
0.8336 sec  
2.0000 sec  
2.72 usec  
1H  
23.5 c  
CDCL3  
77.00 ppm  
0.12 Hz  
60

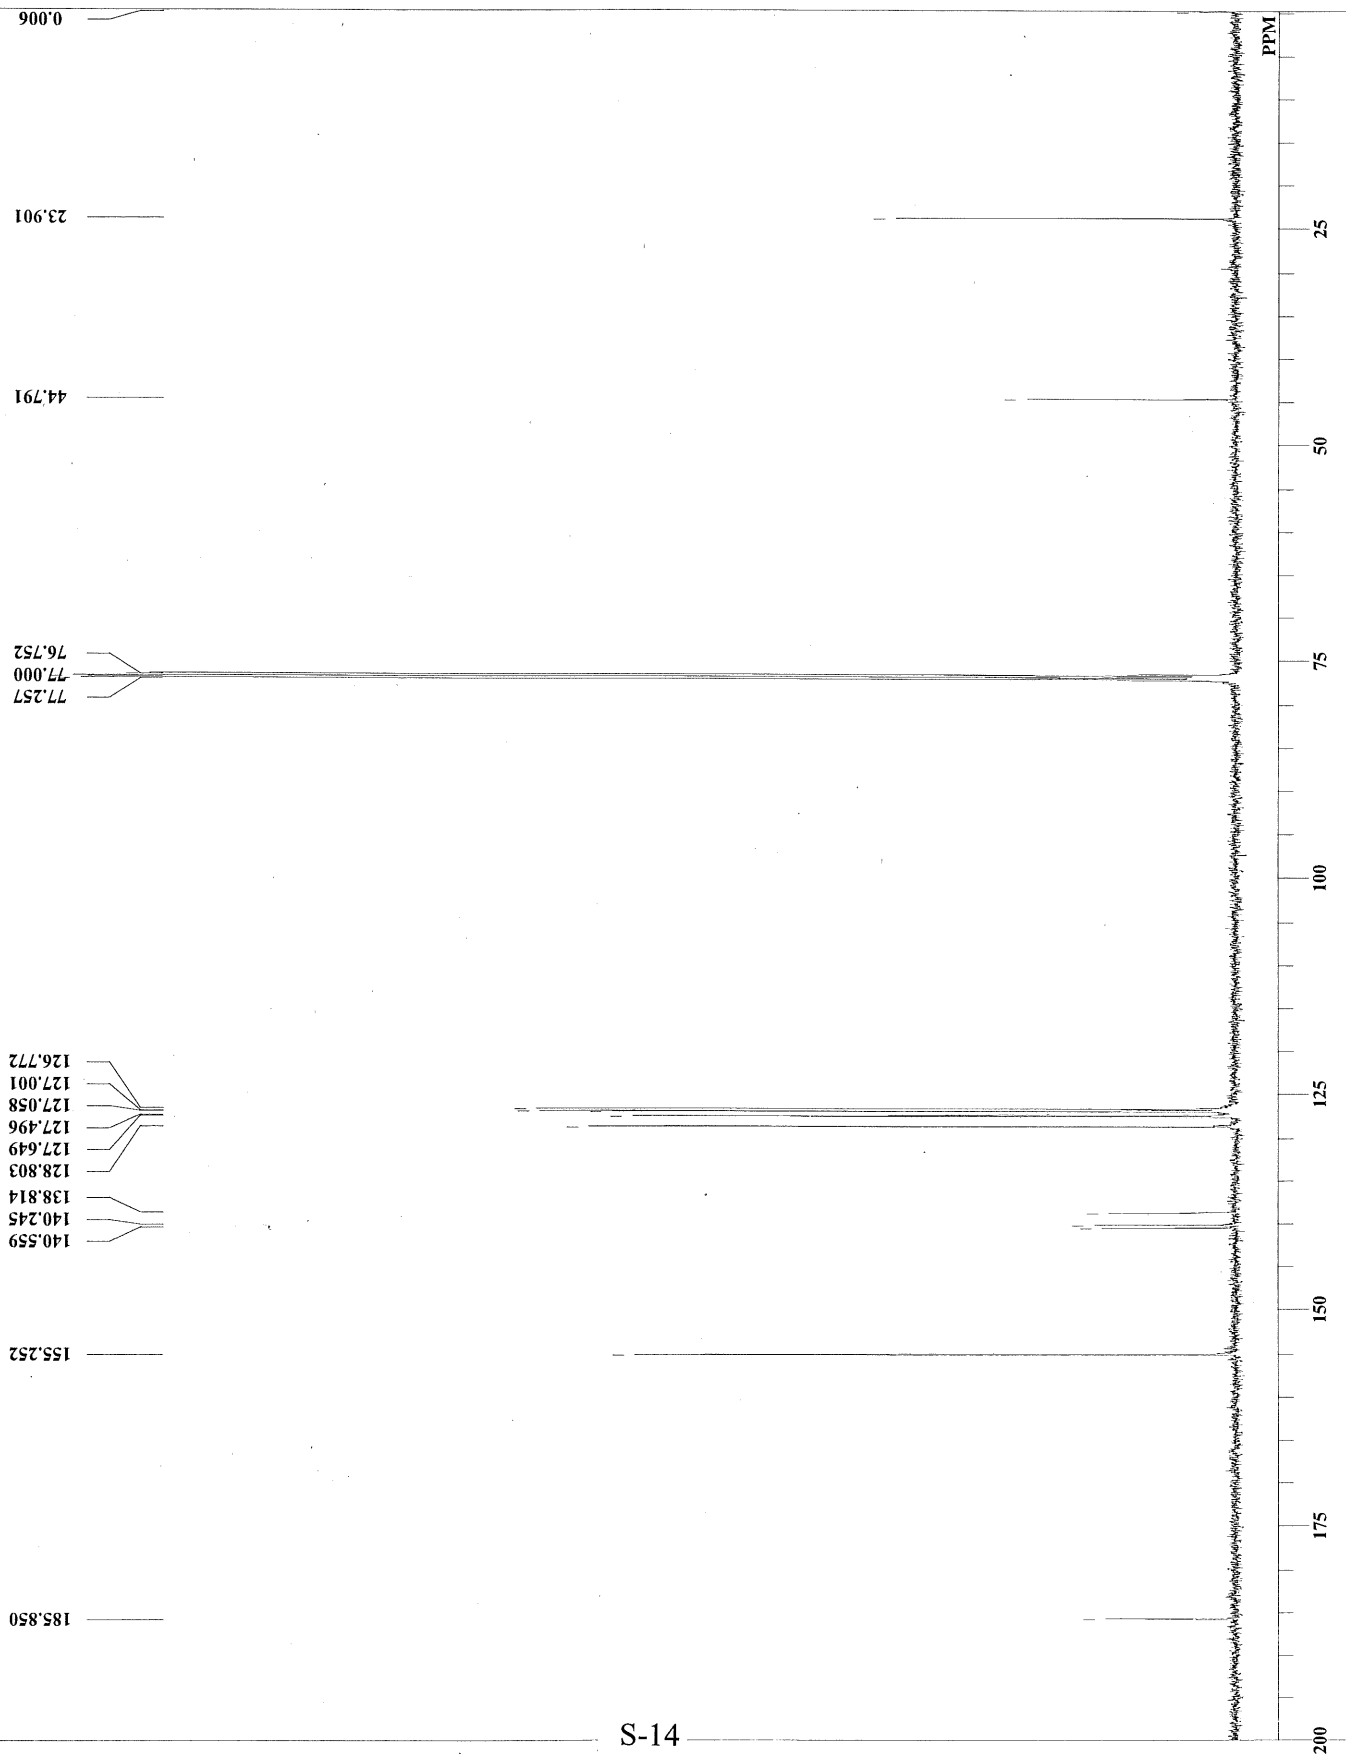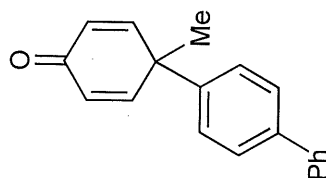

**1e**  
<sup>13</sup>C NMR  
(125 MHz, CDCl<sub>3</sub>)

C:\DOCUMENT-1\ADMINI-1\WINLOCALS-1\Temp\fftp1840\NAO-237\_proton-1-1.als

DFILE  
COMNT  
DATIM  
OBNUC  
EXMOD  
OBFRO  
OBSET  
OBFIN  
POINT  
FREQU  
SCANS  
ACQIM  
PD  
PW1  
IRNUC  
CTEMP  
SLVNT  
EXREF  
BF  
RGAIN

NAO-237\_proton-1-1.als  
single\_pulse  
2012-08-12 15:49:59  
1H  
proton.jpg  
500.16 MHz  
2.41 KHz  
6.01 Hz  
13120  
7507.51 Hz  
8  
1.7459 sec  
5.0000 sec  
4.68 usec  
1H  
22.6 c  
CDCL3  
12.51 ppm  
0.12 Hz  
40

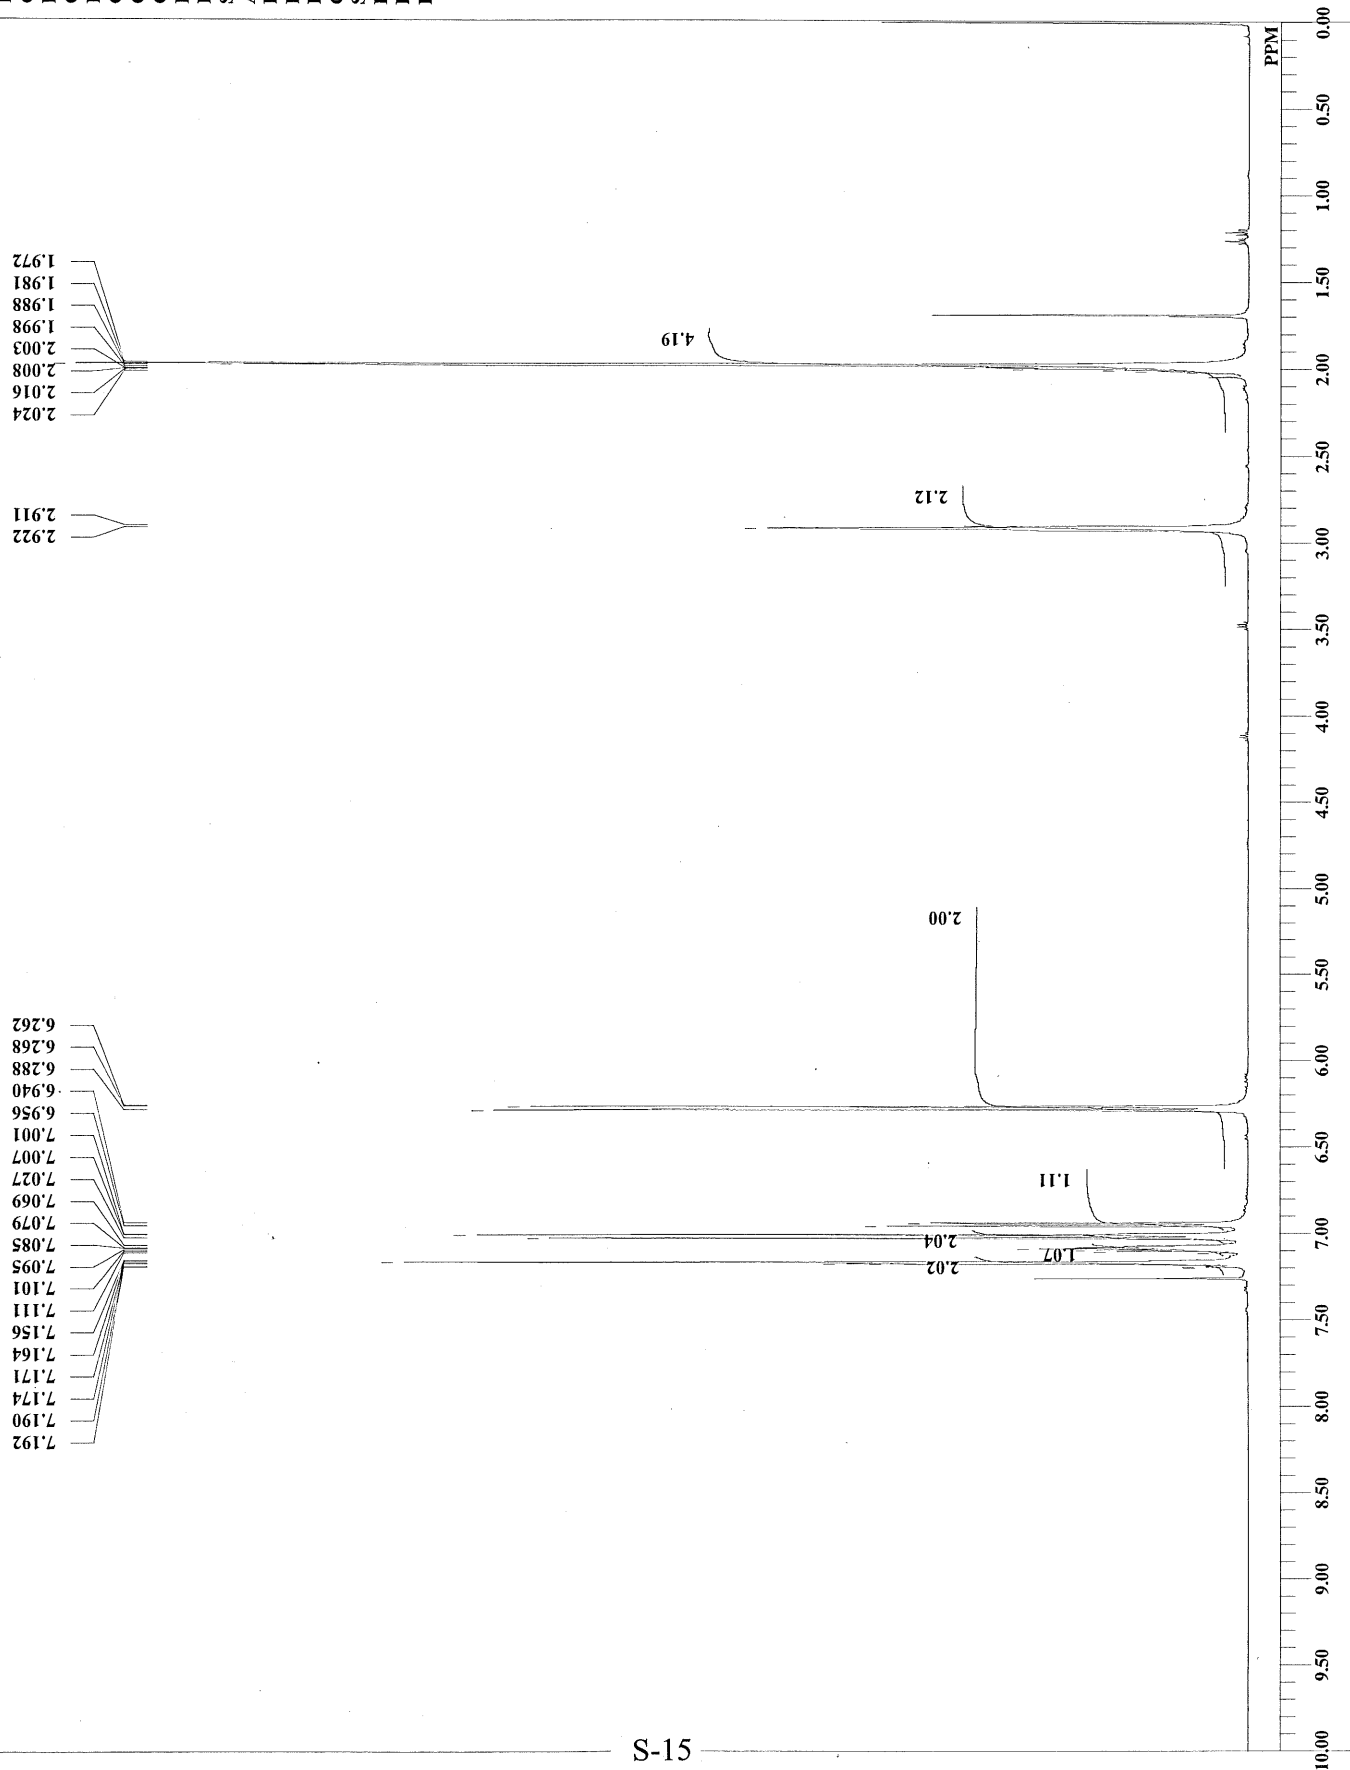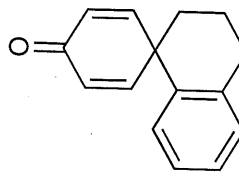

1f  
1H NMR  
(500 MHz, CDCl<sub>3</sub>)

C:\DOCUME~1\ADMINI~1\WINLOCALS~1\Temp\ffftip1988\NAO-237\_Carbon-1-1.als

DFLE  
 COMNT  
 DATIM  
 OBNUC  
 EXMOD  
 OBFRO  
 OBSET  
 OBFIN  
 POINT  
 FREQU  
 SCANS  
 ACQTM  
 PD  
 PW1  
 IRNUC  
 CTMP  
 SLVNT  
 EXREF  
 BF  
 RGAIN

NAO-237\_Carbon-1-1.als  
 single pulse decoupled gated NOE  
 2012-08-12 15:58:20  
 13C  
 carbon.jsp  
 125.77 MHz  
 7.87 KHz  
 4.21 Hz  
 26224  
 31446.54 Hz  
 256  
 0.8336 sec  
 2.0000 sec  
 2.72 usec  
 1H  
 23.2 c  
 CDCL3  
 77.00 ppm  
 0.12 Hz  
 60

19.228

29.583

34.208

44.744

76.752

77.000

77.257

126.343

126.791

127.487

128.793

130.233

133.389

136.459

155.310

186.164

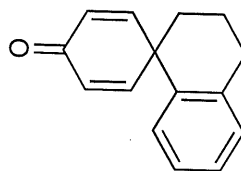

**1f**  
<sup>13</sup>C NMR  
 (125 MHz, CDCl<sub>3</sub>)

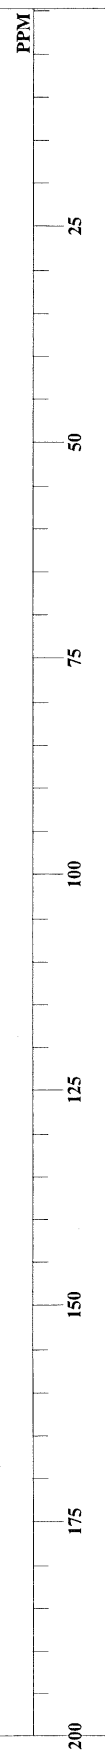

DFILE  
COMNT  
DATIM  
OBNUC  
EXMOD  
OBFRO  
OBFET  
OBFIN  
FREQU  
SCANS  
ACQTM  
PD  
PWI  
IRNUC  
CTEMP  
SLVNT  
EXREF  
BF  
RGAIN

MY-830-up\_proton-1-1.als  
single\_pulse  
2012-07-28 15:55:23  
1H  
proton.jpg  
500.16 MHz  
2.41 KHz  
6.01 Hz  
13120  
7507.51 Hz  
8  
1.7459 sec  
5.0000 sec  
4.68 usec  
1H  
22.4 c  
CDCL3  
7.26 ppm  
0.12 Hz  
34

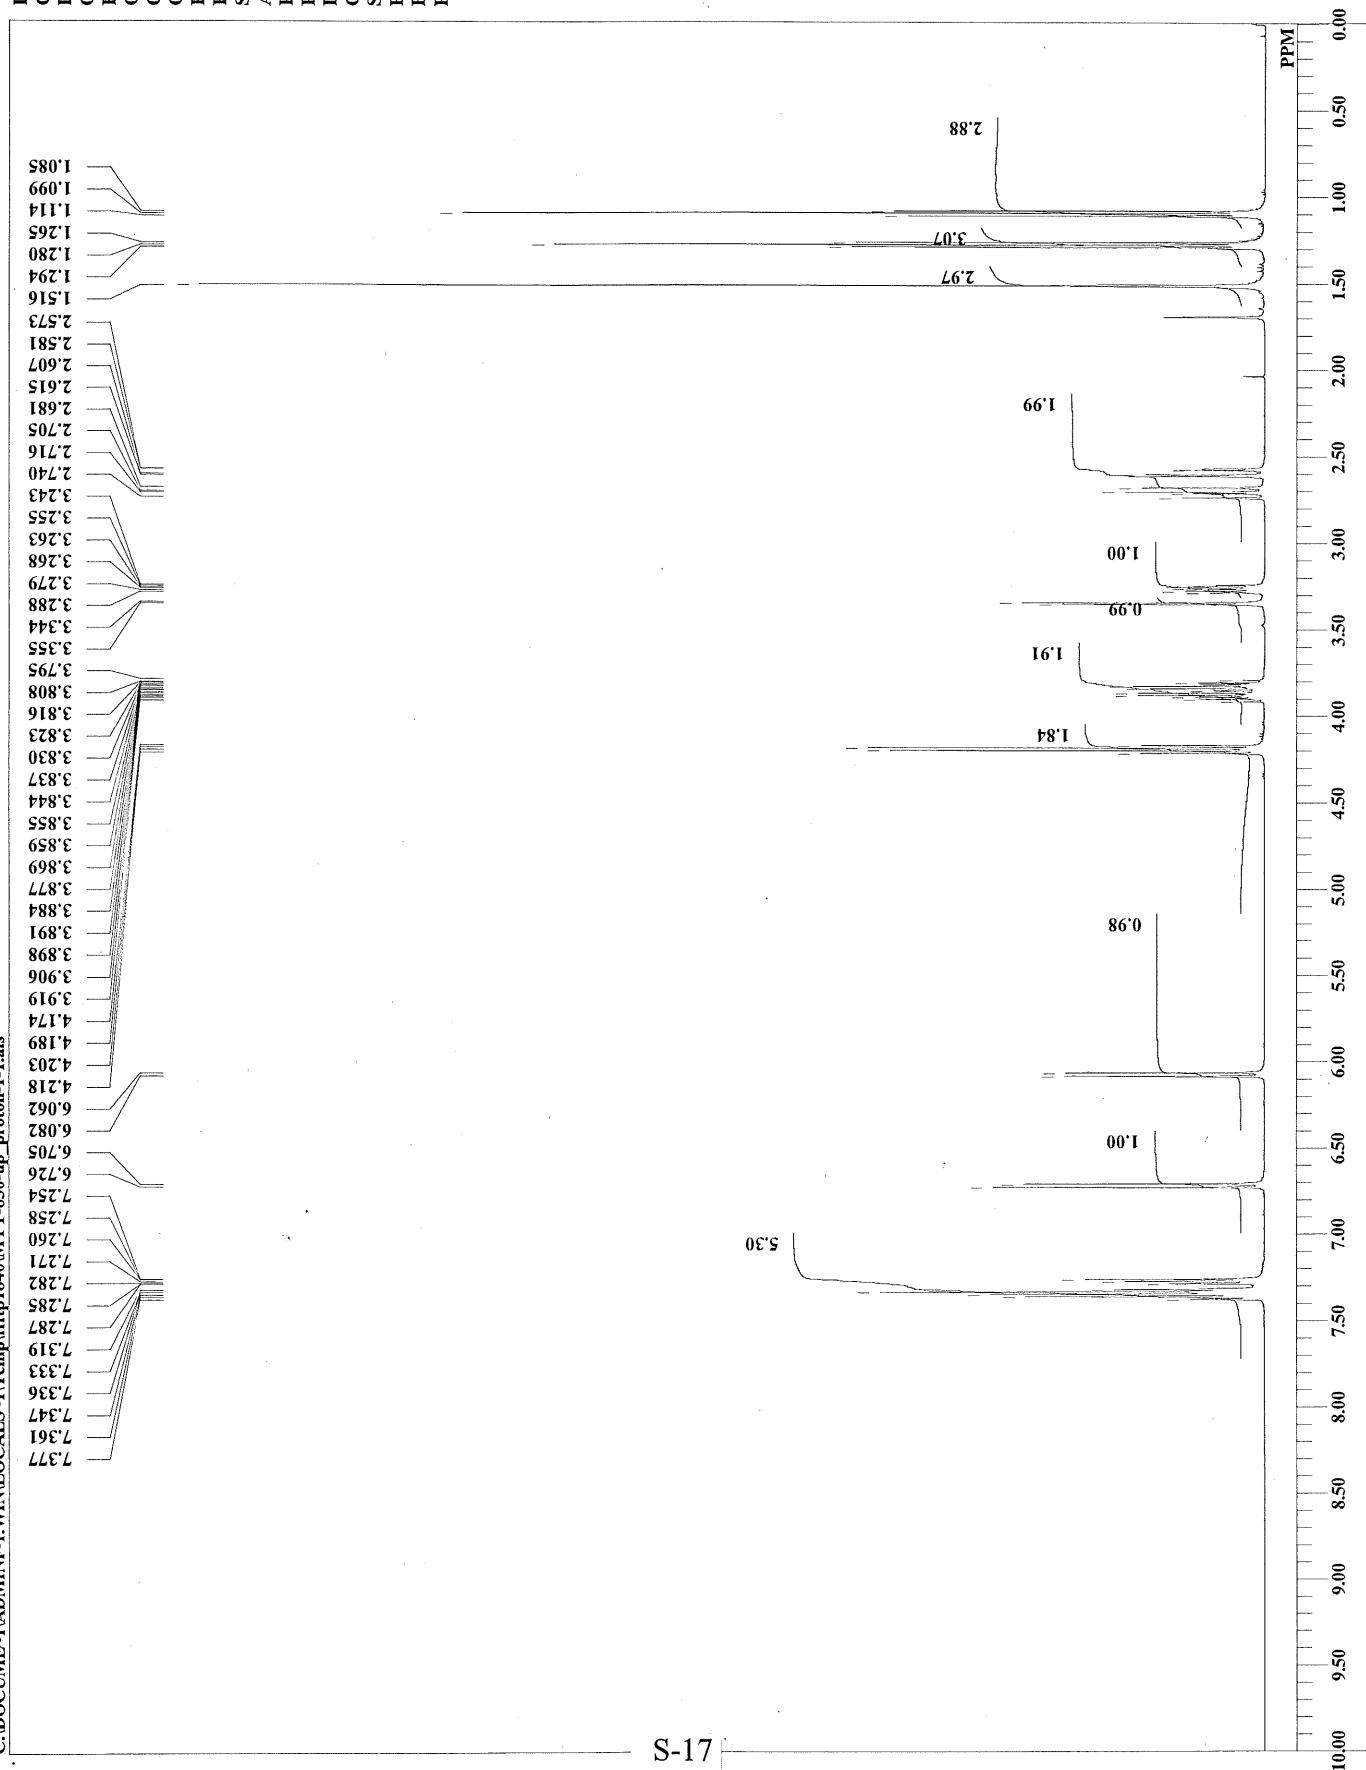

C:\DOCUMENT-1\ADMINI-1\WINLOCALS-1\Temp\ffftp1988\YYY-830-up\_Carbon-1-1.als

DFLE MYY-830-up\_Carbon-1-1.als  
 COMNT single pulse decoupled gated NOE  
 DATM 2012-07-28 16:02:42  
 OBNUC 13C  
 EXMOD carbon.jpg  
 OBFRO 125.77 MHz  
 OBSET 7.87 KHz  
 OBFIN 4.21 Hz  
 POINT 26224  
 FREQU 31446.54 Hz  
 SCANS 512  
 ACQTM 0.8336 sec  
 PD 2.0000 sec  
 PW1 2.72 usec  
 IRNUC 1H  
 CTMP 23.1 c  
 SLVNT CDCL3  
 EXREF 77.00 ppm  
 BF 0.12 Hz  
 RGAIN 60

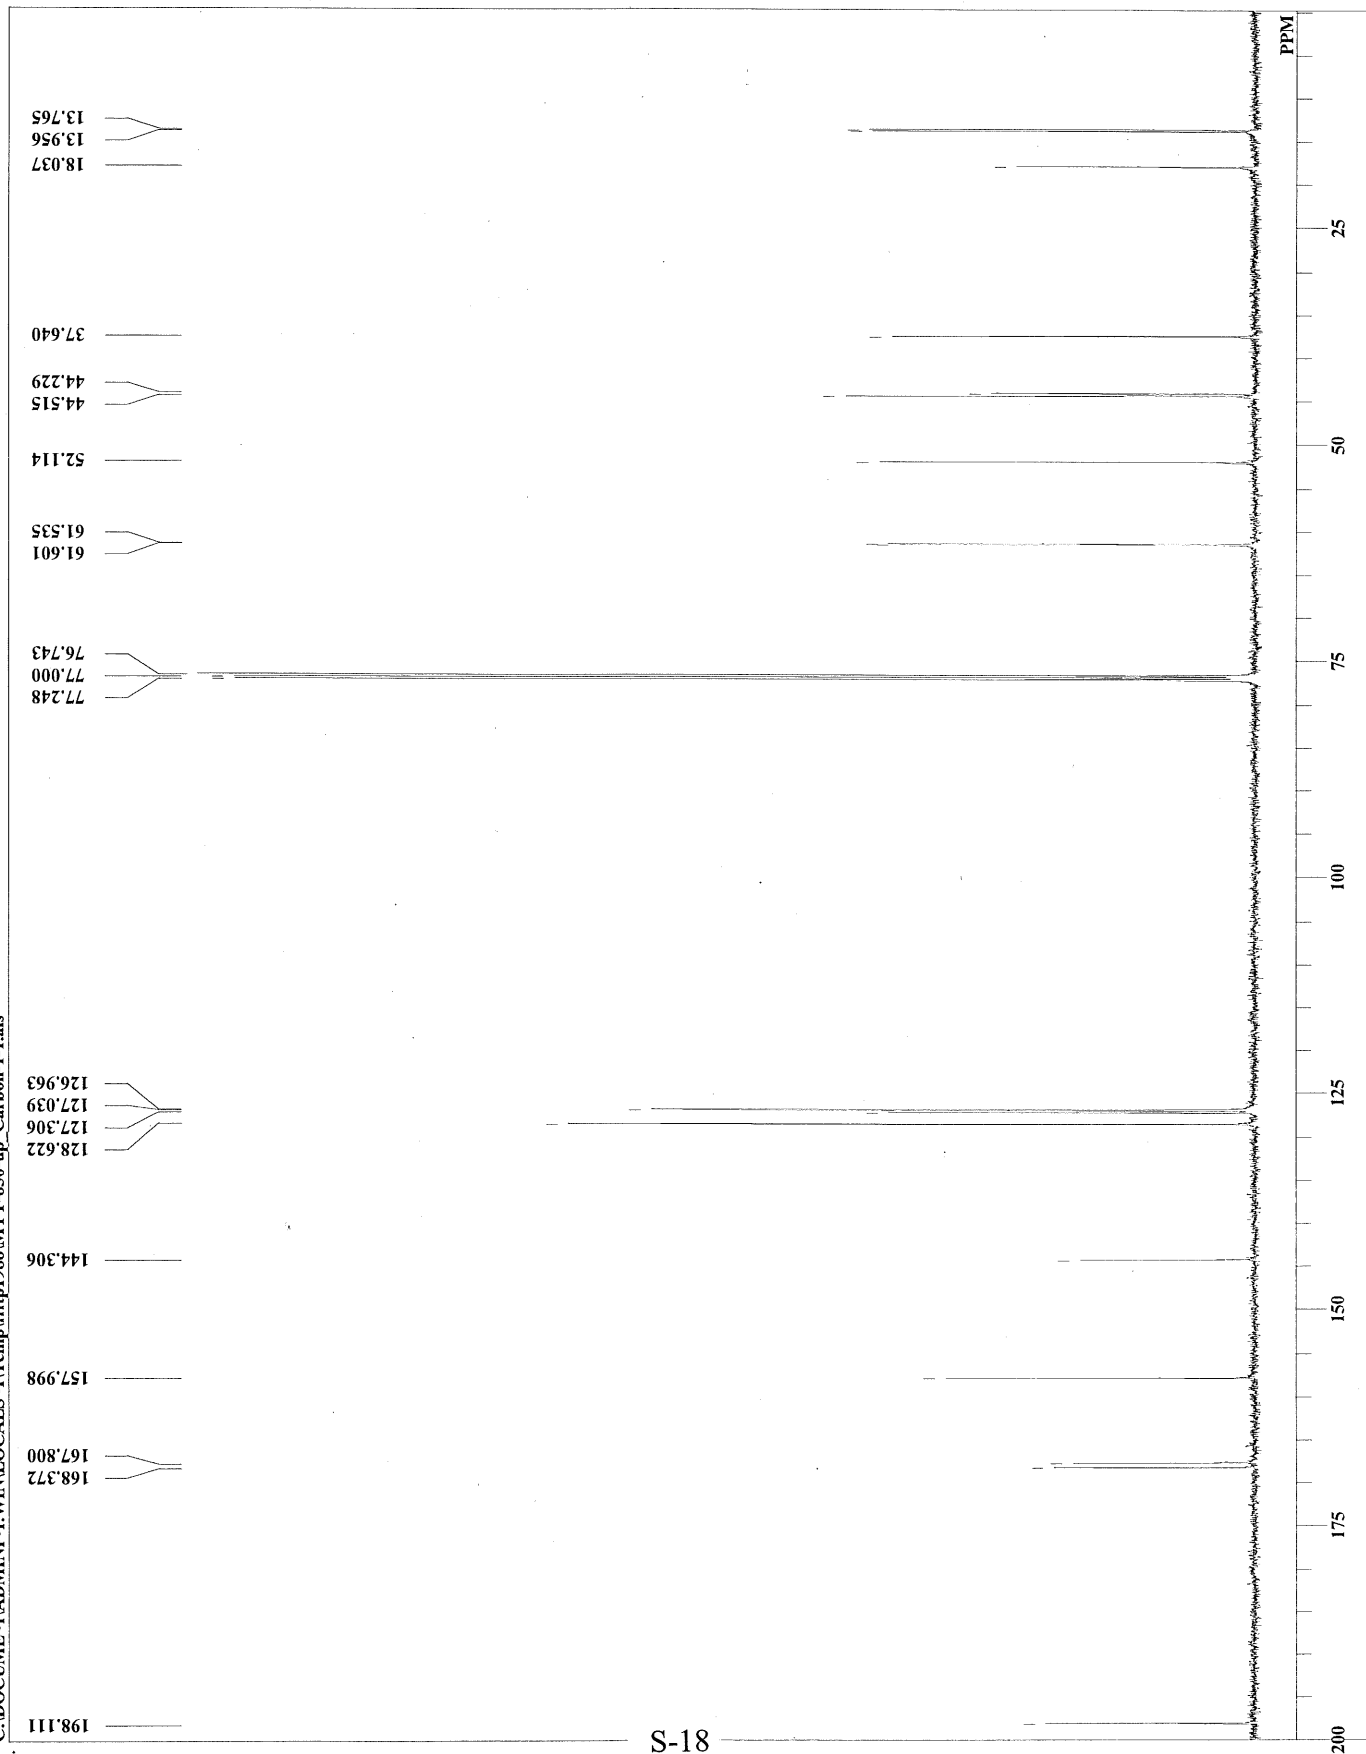

DFILE  
COMNT  
DATIM  
OBNUC  
EXMOD  
OBFRO  
OBSET  
OBFIN  
POINT  
FREQU  
SCANS  
ACQTM  
PD  
PW1  
IRNUC  
CTEMP  
SLVNT  
EXREF  
BF  
RGAIN

NAO-207 down.als  
Sat Jan 21 21:45:47 2012  
1H  
non  
399.65 MHz  
0.00 KHz  
134300.00 Hz  
8192  
7993.60 Hz  
16  
1.0248 sec  
5.9752 sec  
4.45 usec  
1H  
18.6 c  
CDCL3  
7.26 ppm  
0.12 Hz  
28

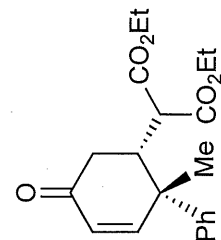

4a  
<sup>1</sup>H NMR  
(500 MHz, CDCl<sub>3</sub>)

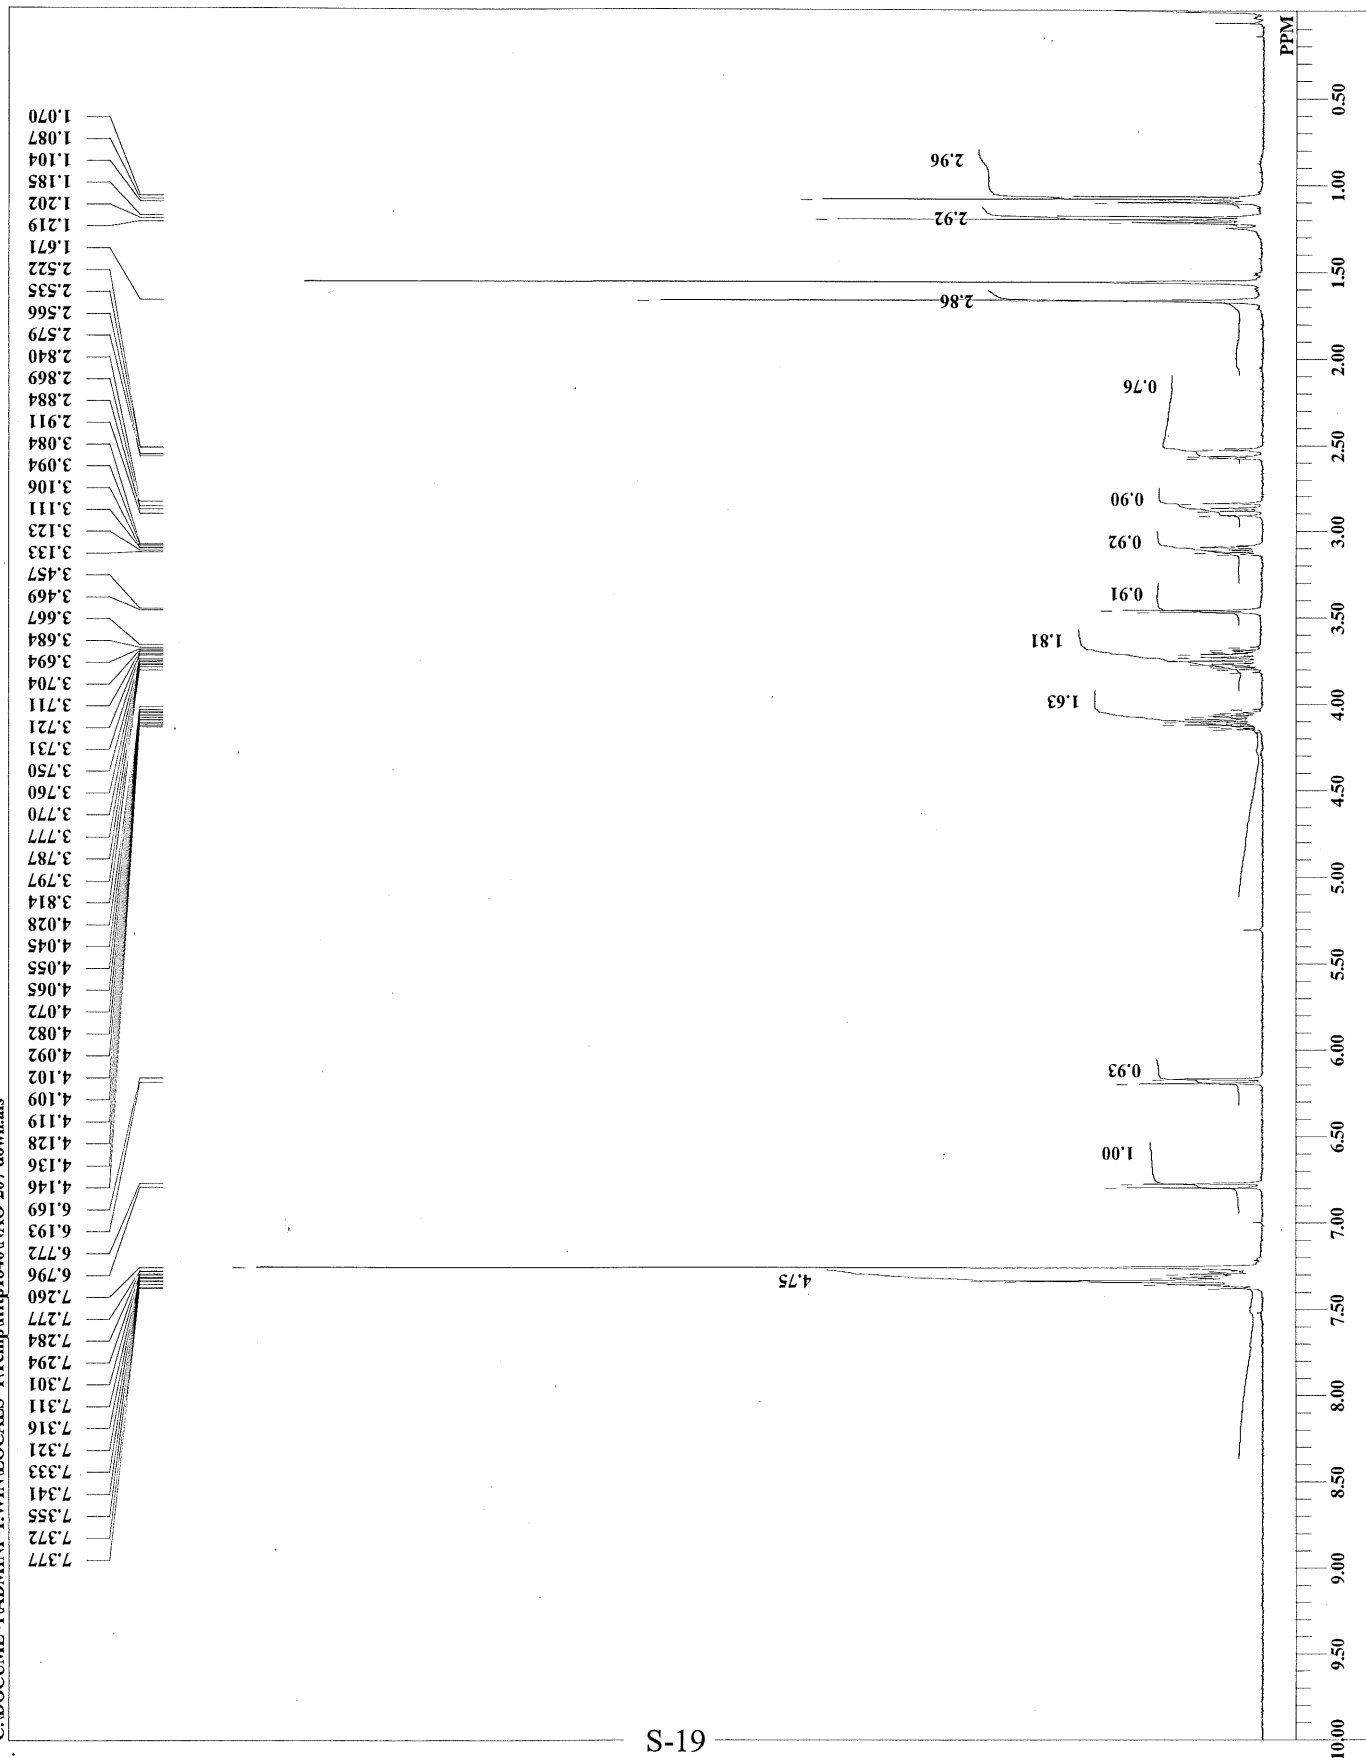

C:\DOCUMENT-1\ADMINI-1\WINLOCALS-1\Temp\ffftp1988\NAO-207 13C down\_Carbon-1-1.als

DFILE  
COMNT  
DATUM  
OBNUC  
EXMOD  
OBFRO  
OBSET  
OBFIN  
POINT  
FREQU  
SCANS  
ACQTM  
PD  
PWI  
IRNUC  
CTEMP  
SLVNT  
EXREF  
BF  
RGAIN

NAO-207 13C down\_Carbon-1-1.als  
single pulse decoupled gated NOE  
2012-02-05 00:51:11  
13C  
carbon.jpg  
125.77 MHz  
7.87 KHz  
4.21 Hz  
26224  
31446.54 Hz  
11264  
0.8336 sec  
2.0000 sec  
2.72 usec  
1H  
17.4 c  
CDCL3  
77.00 ppm  
0.12 Hz  
54

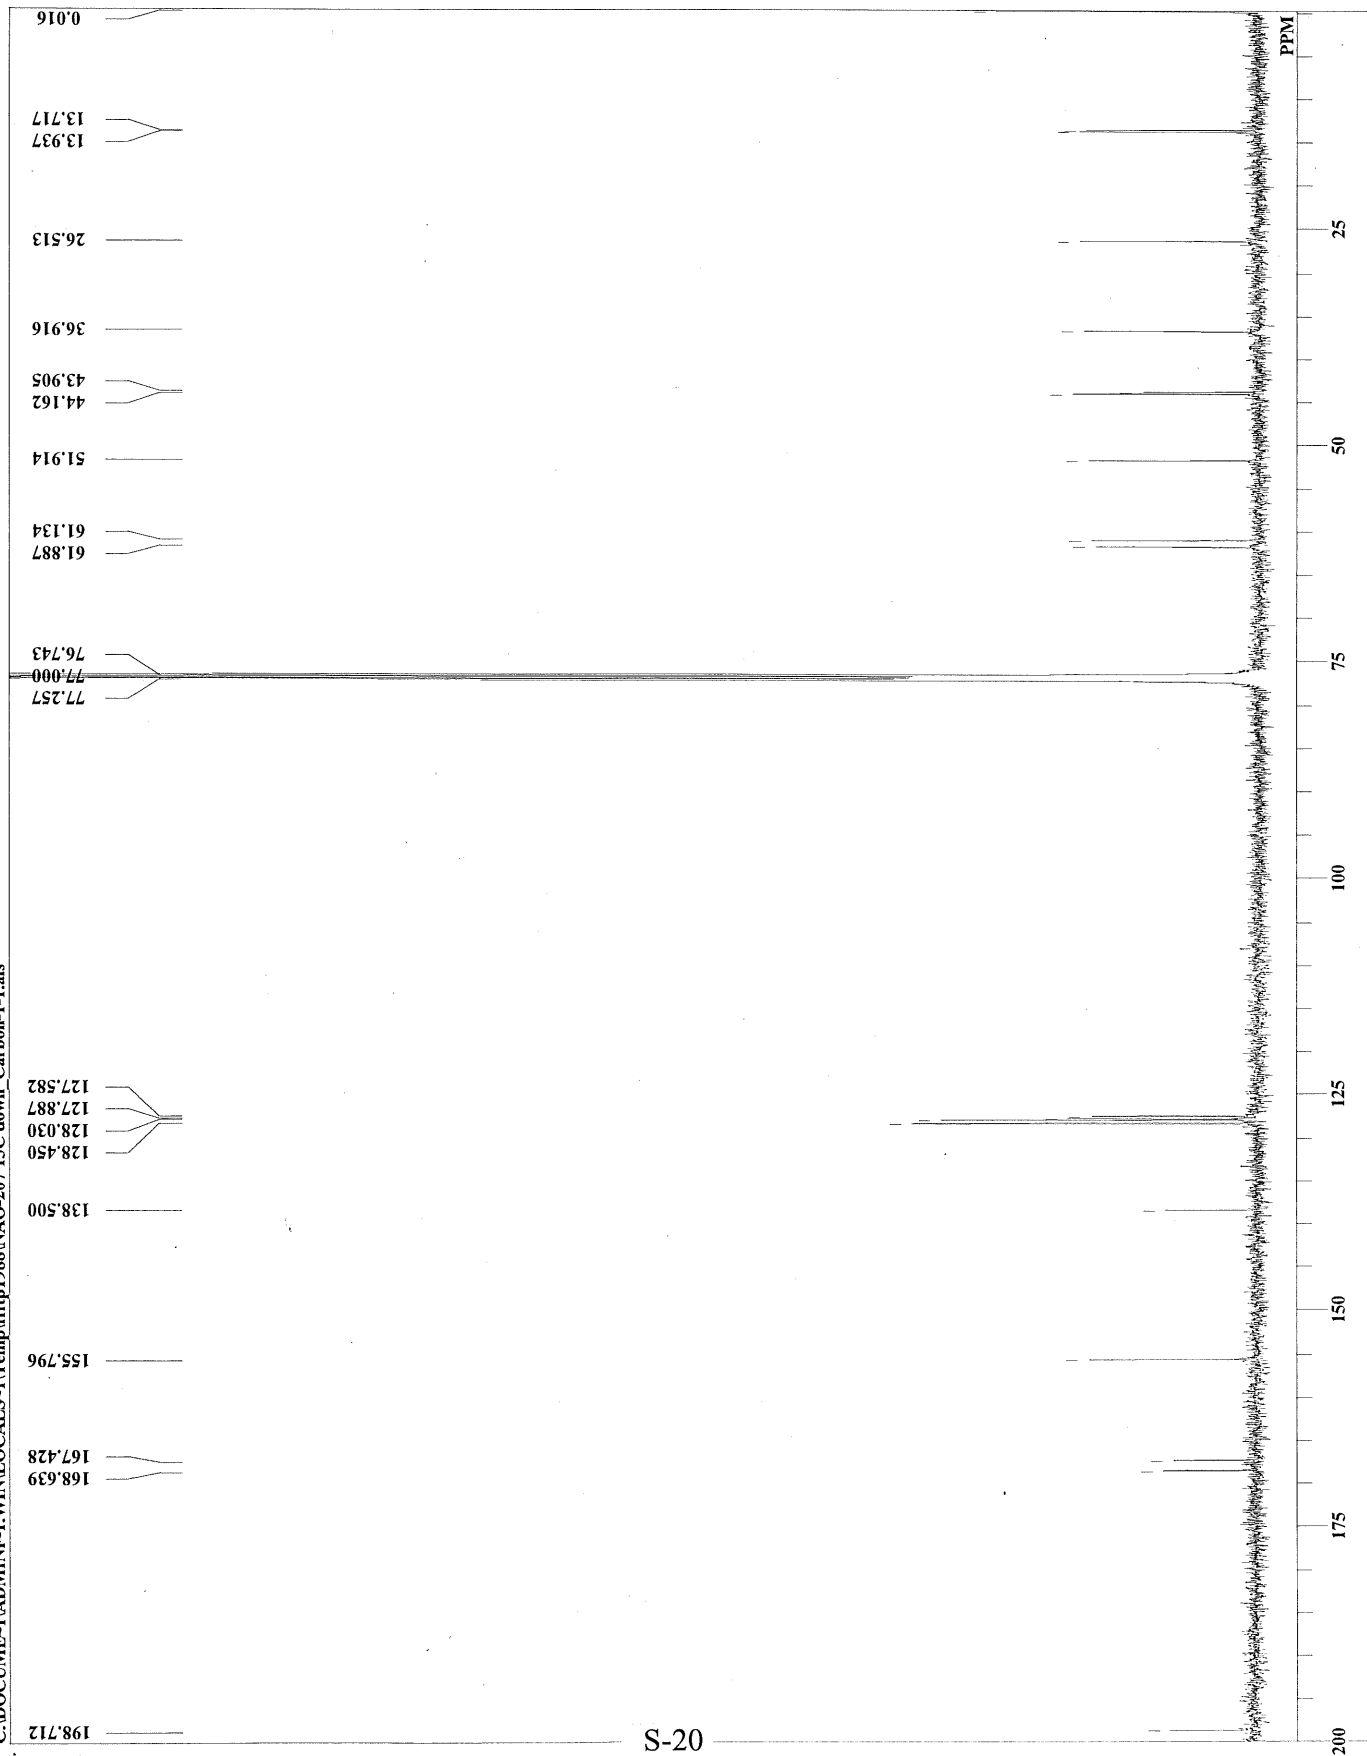

DFILE  
COMNT  
DATIM  
OBNUC  
EXMOD  
OBFRO  
OBSST  
OBFIN  
POINT  
FREQU  
SCANS  
ACQTM  
PD  
PWI  
IRNUC  
CTEMP  
SLVNT  
EXREF  
BF  
RGAIN

NAO-200-bypro\_proton-1-1.als  
single\_pulse  
2012-10-22 21:33:21  
1H  
proton.jpg  
500.16 MHz  
2.41 KHz  
6.01 Hz  
13120  
7507.51 Hz  
8  
1.7459 sec  
5.0000 sec  
4.68 usec  
1H  
19.4 c  
CDCL3  
12.51 ppm  
0.12 Hz  
38

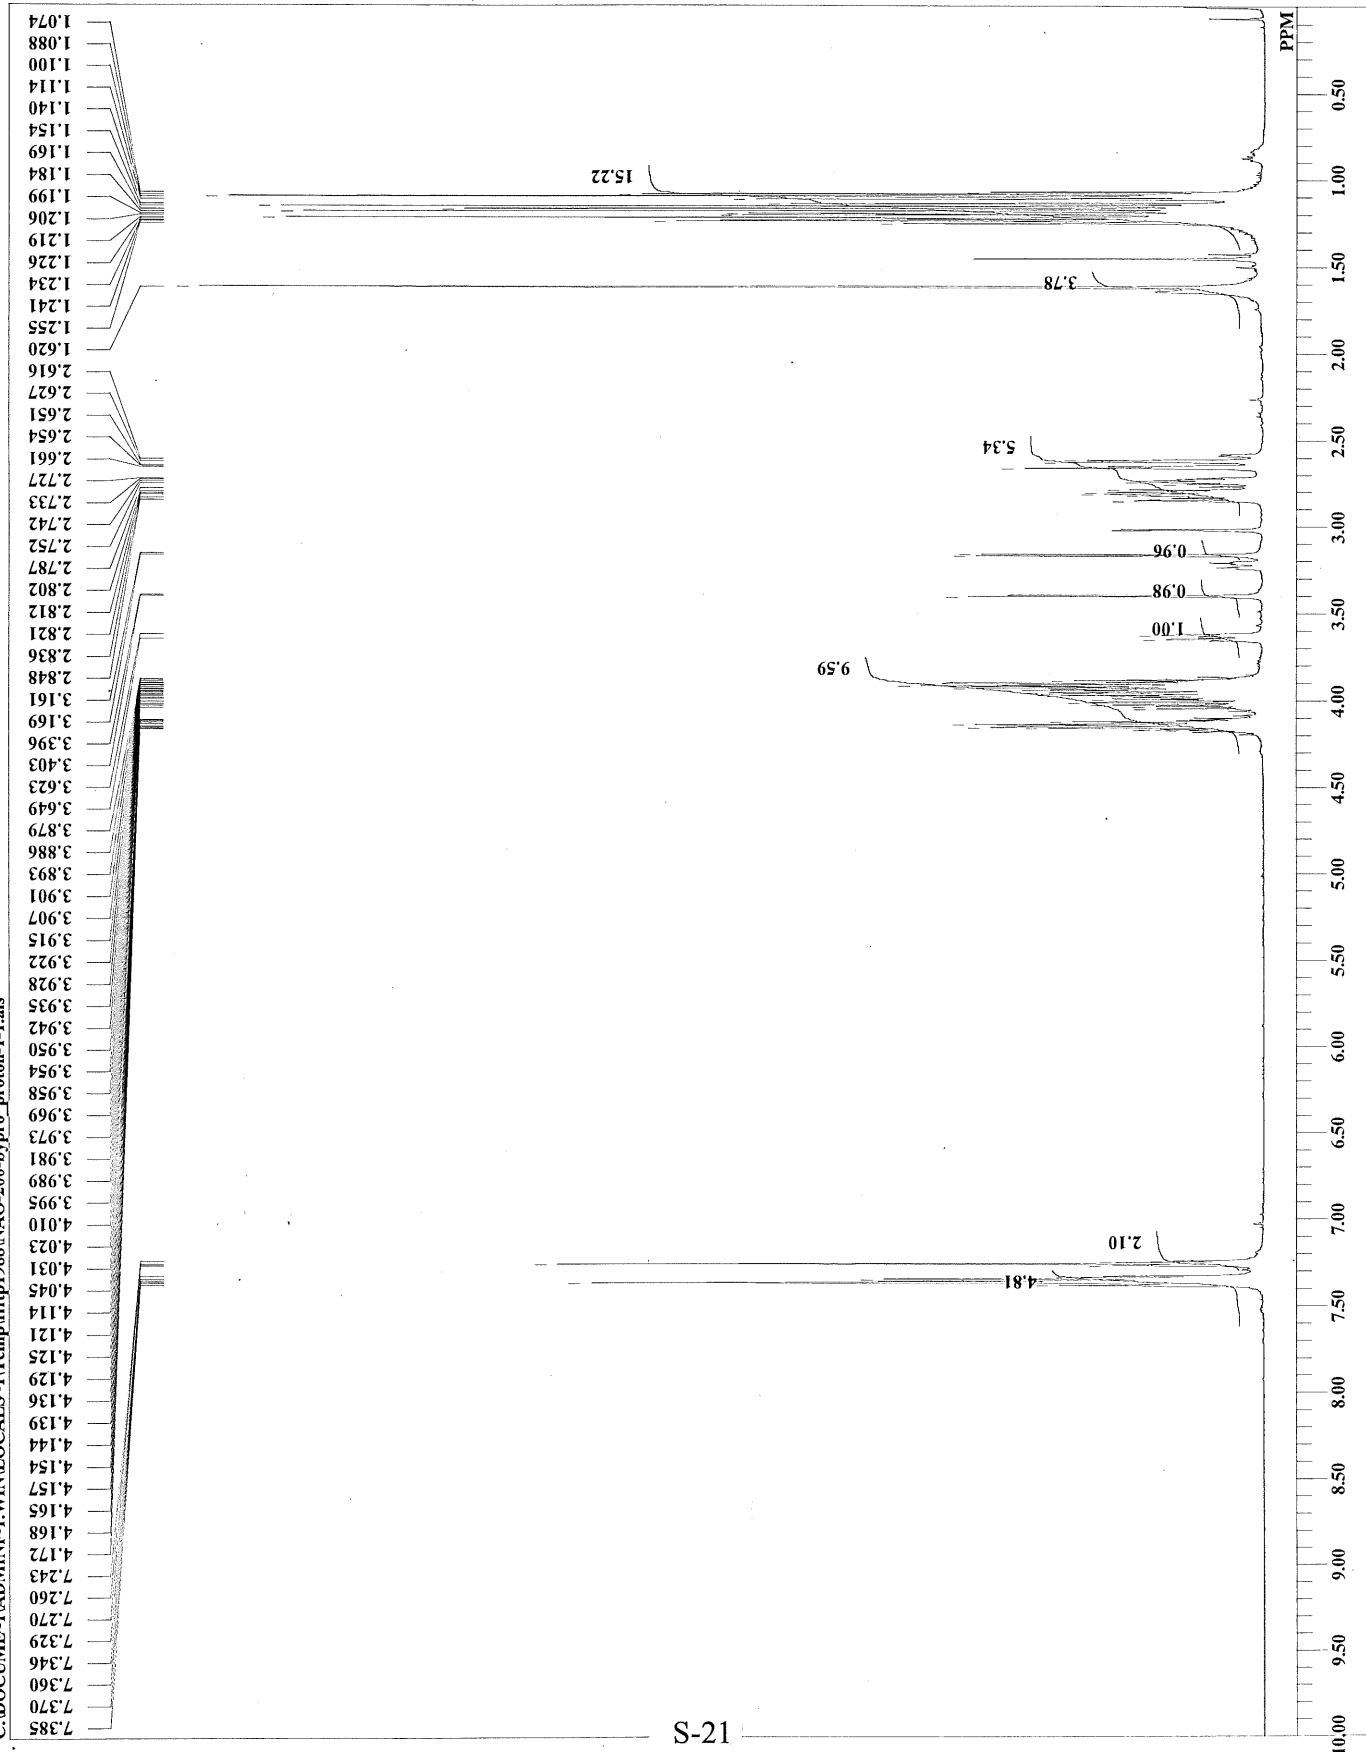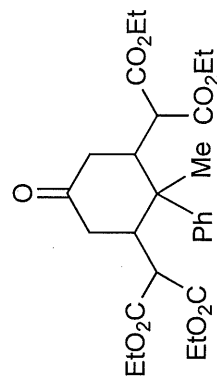

5  
<sup>1</sup>H NMR  
(500 MHz, CDCl<sub>3</sub>)

C:\DOCUME-1\ADMINI-1\WINLOCALS-1\Temp\ffftp1988\NAO-200-bypro\_Carbon-1-1.als

DFILE  
 COMNT  
 DATIM  
 OBNUC  
 EXMOD  
 OBFRO  
 OBSET  
 OBFIN  
 POINT  
 FREQU  
 SCANS  
 ACQIM  
 PD  
 PW1  
 IRNUC  
 CTEMP  
 SLVNT  
 EXREF  
 BF  
 RGAIN

21.822  
 13.965  
 13.918  
 13.851  
 13.822  
 13.784  
 13.708  
 38.689  
 39.099  
 39.566  
 40.663  
 43.580  
 45.096  
 45.821  
 46.307  
 51.952  
 52.095  
 52.362  
 61.391  
 61.477  
 61.611  
 61.678  
 61.754  
 76.743  
 77.000  
 77.248

168.533  
 168.487  
 168.449  
 168.391  
 168.086  
 142.685  
 128.917  
 128.593  
 127.468  
 127.229  
 208.409

NAO-200-bypro\_Carbon-1-1.als  
 single pulse decoupled gated NOE  
 2012-10-22 21:40:45  
 13C

carbon.jpg  
 125.77 MHz  
 7.87 KHz  
 4.21 Hz  
 26224  
 31446.54 Hz  
 512  
 0.8336 sec  
 2.0000 sec  
 2.72 usec  
 1H  
 19.9 c  
 CDCL3  
 77.00 ppm  
 0.12 Hz  
 60

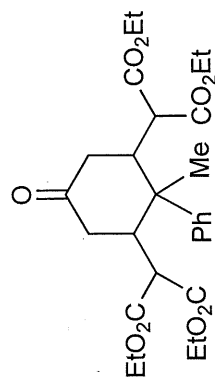

5  
<sup>13</sup>C NMR  
 (125 MHz, CDCl<sub>3</sub>)

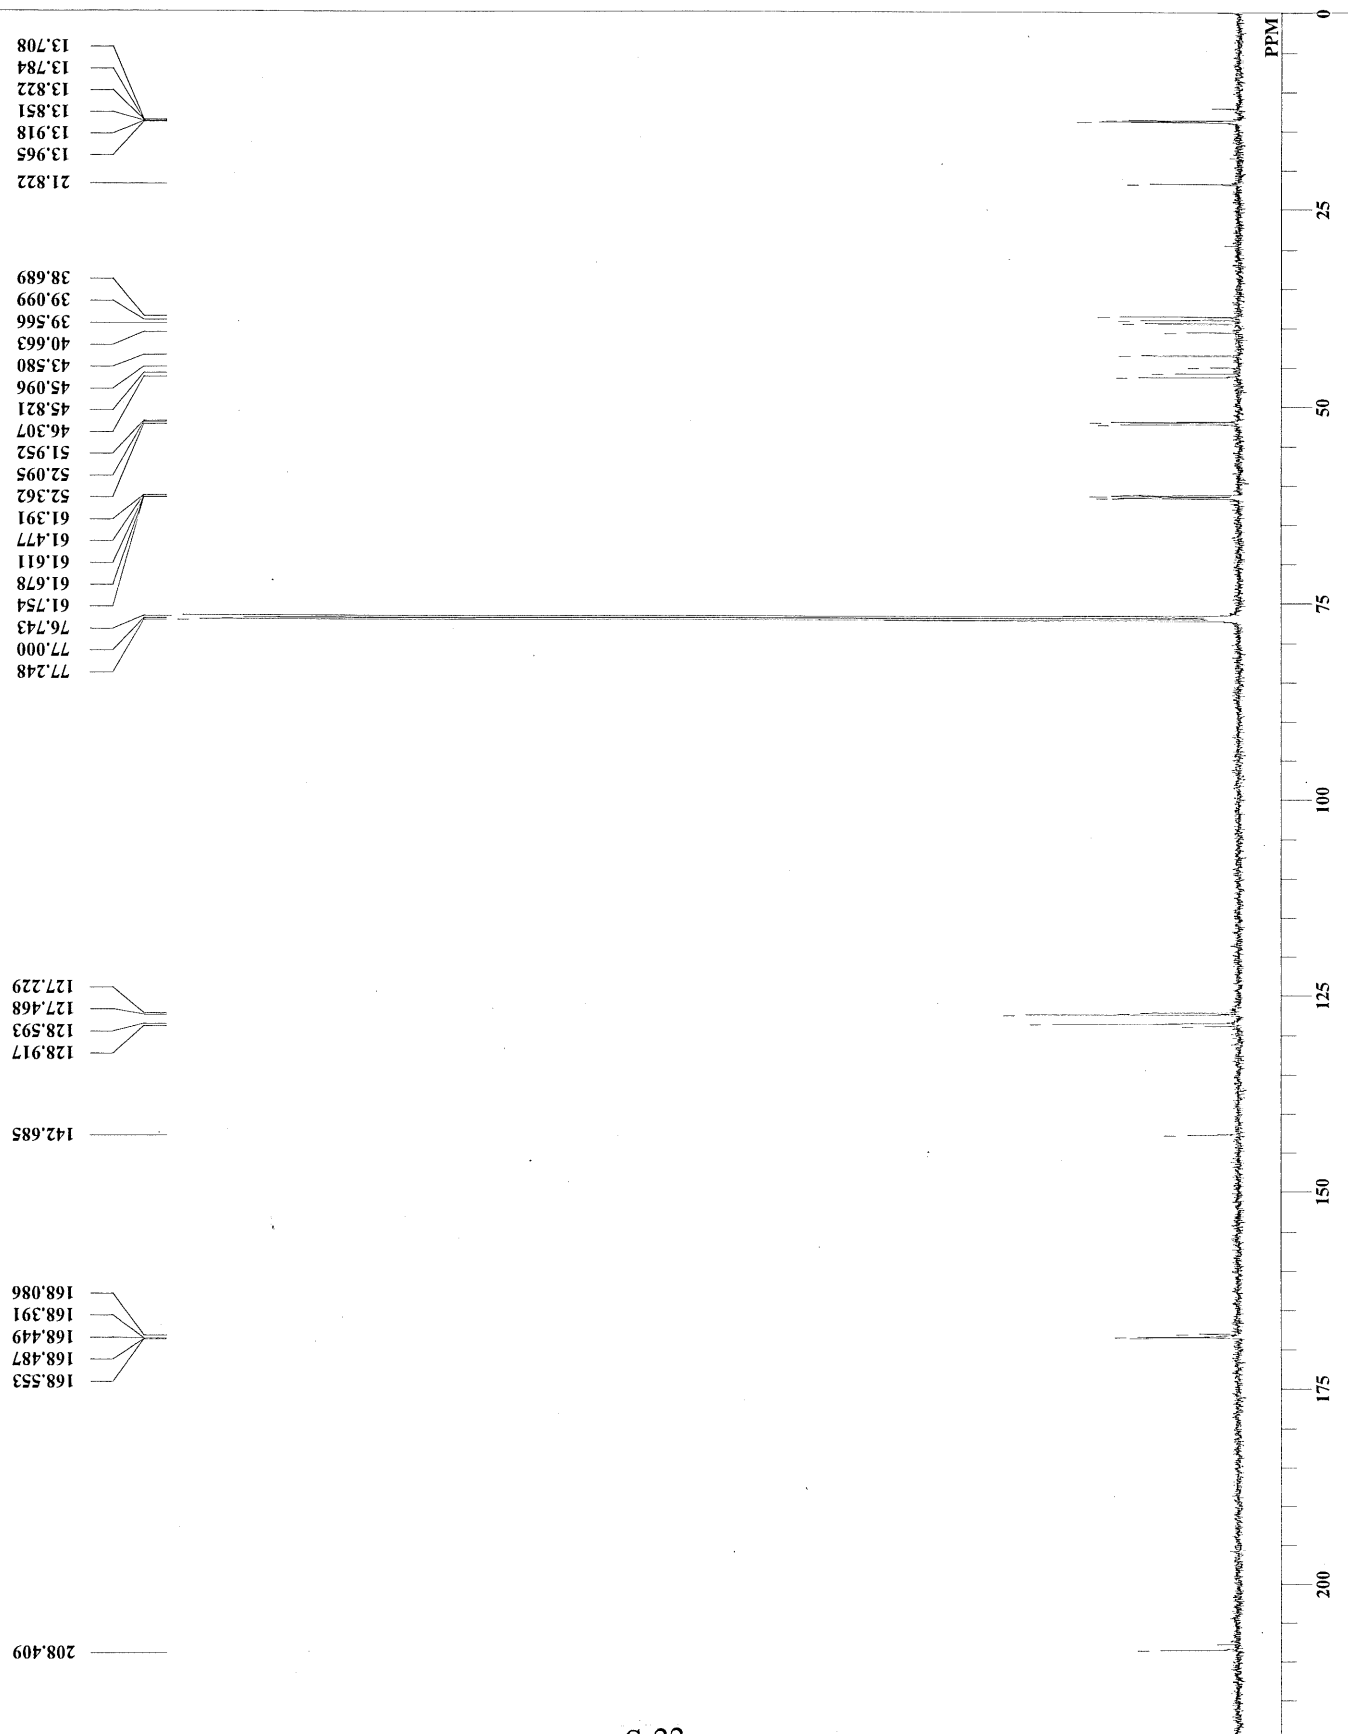

DFILE NAO-236-up\_proton-1-1.als  
COMNT  
DATIM 2012-07-19 09:25:55  
OBNUC 1H  
EXMOD proton.jpg  
OBFRQ 500.16 MHz  
OBSET 2.41 KHz  
OBTIN 6.01 Hz  
POINT 13120  
FREQU 7507.51 Hz  
SCANS 8  
ACQTM 1.7459 sec  
PD 5.0000 sec  
PWI 4.68 usec  
IRNUC 1H  
CTEMP 22.1 c  
SLVNT CDCL3  
EXREF 12.51 ppm  
BF 0.12 Hz  
RGAIN 34

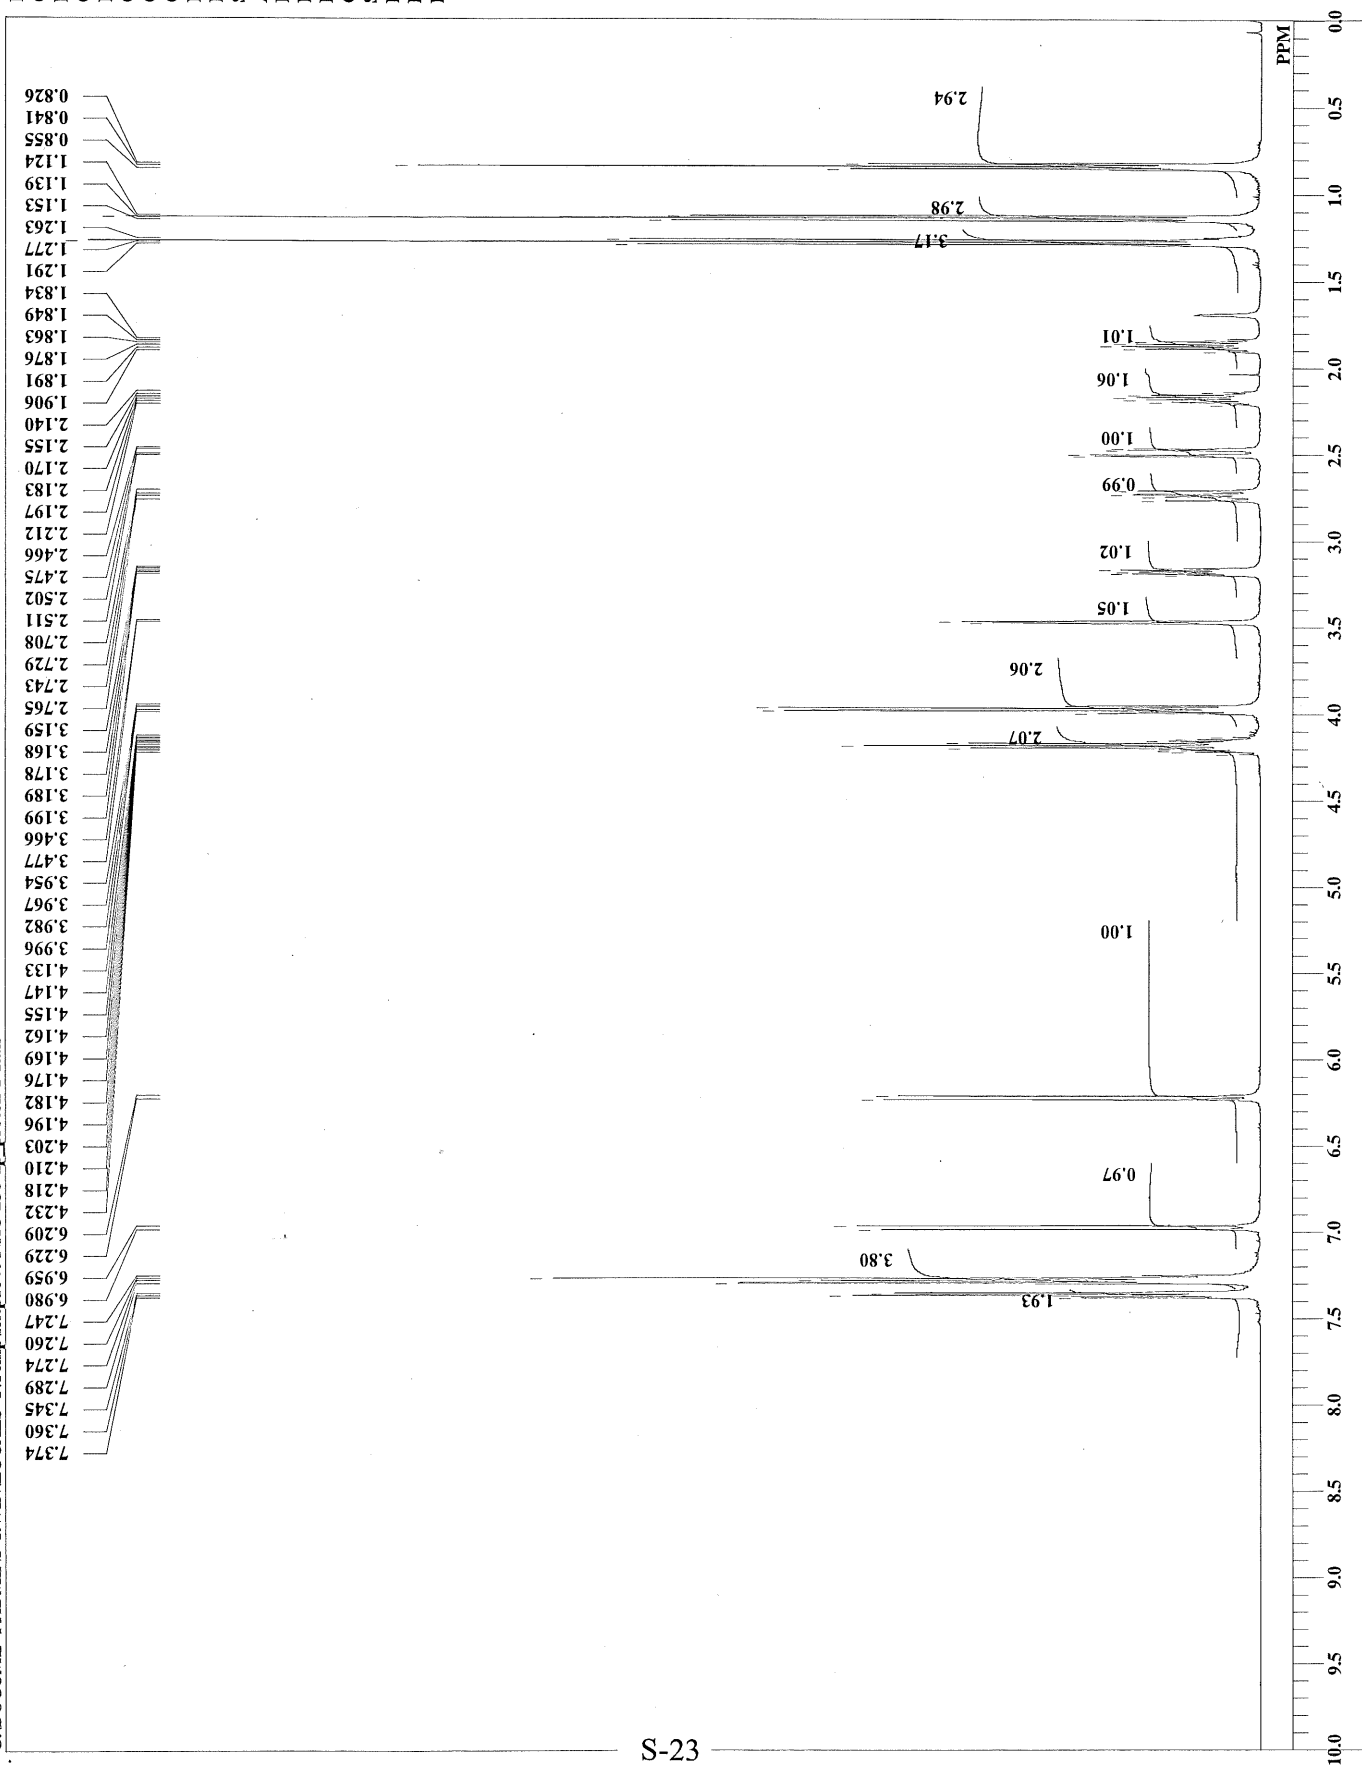

C:\DOCUMENT-1\ADMINI-1\WINLOCALS-1\Temp\ffftp1988\NAO-236-up\_Carbon-1-1.jdf

DFILE NAO-236-up\_Carbon-1-1.jdf  
 COMNT single pulse decoupled gated NOE  
 DATIM 2012-07-19 09:29:27  
 OBNUC <sup>13</sup>C  
 EXMOD carbon.jsp  
 OBFRQ 125.77 MHz  
 OBSET 7.87 KHz  
 OBFIN 4.21 Hz  
 POINT 32780  
 FREQU 39308.18 Hz  
 SCANS 512  
 ACQTM 0.8336 sec  
 PD 2.0000 sec  
 PW1 2.72 usec  
 IRNUC <sup>1</sup>H  
 CTEMP 22.9 c  
 SLVNT NONE  
 EXREF 77.00 ppm  
 BF 0.12 Hz  
 RGAIN 60

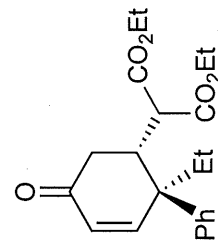

**3b**  
<sup>13</sup>C NMR  
 (125 MHz, CDCl<sub>3</sub>)

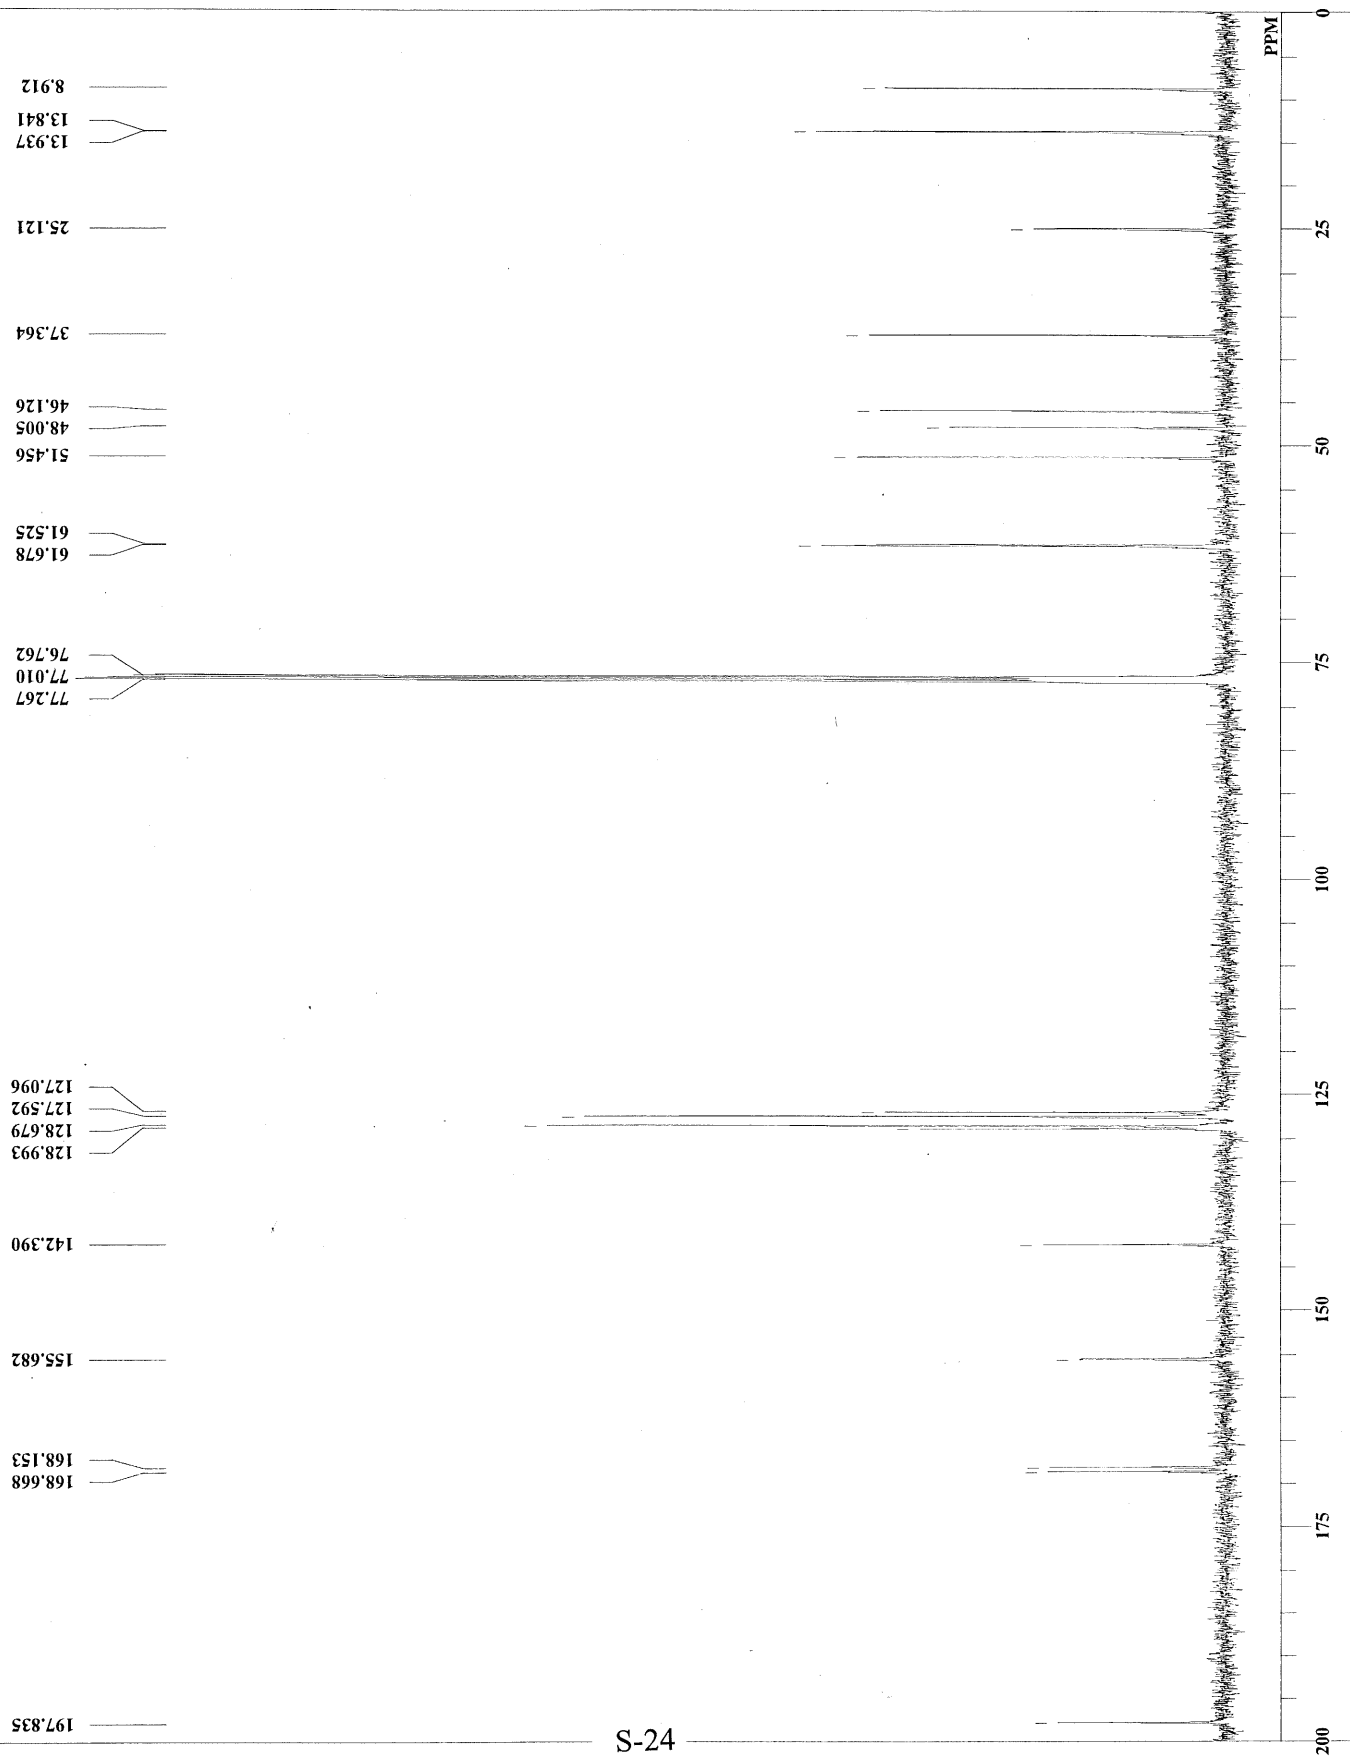

DFTLE  
 COMNT  
 DATIM  
 OBNUC  
 EXMOD  
 OBFRO  
 OBSET  
 OBFIN  
 POINT  
 FREQU  
 SCANS  
 ACQIM  
 PD  
 PWI  
 IRNUC  
 CTEMP  
 SLVNT  
 EXREF  
 BF  
 RGAIN

NAO-236-down\_proton-3-1.als  
 NAO-236-syn  
 2012-08-07 23:31:08  
 1H  
 proton.jpg  
 500.16 MHz  
 2.41 KHz  
 6.01 Hz  
 13120  
 7507.51 Hz  
 8  
 1.7459 sec  
 5.0000 sec  
 4.68 usec  
 1H  
 23.4 c  
 CDCL3  
 7.26 ppm  
 0.12 Hz  
 44

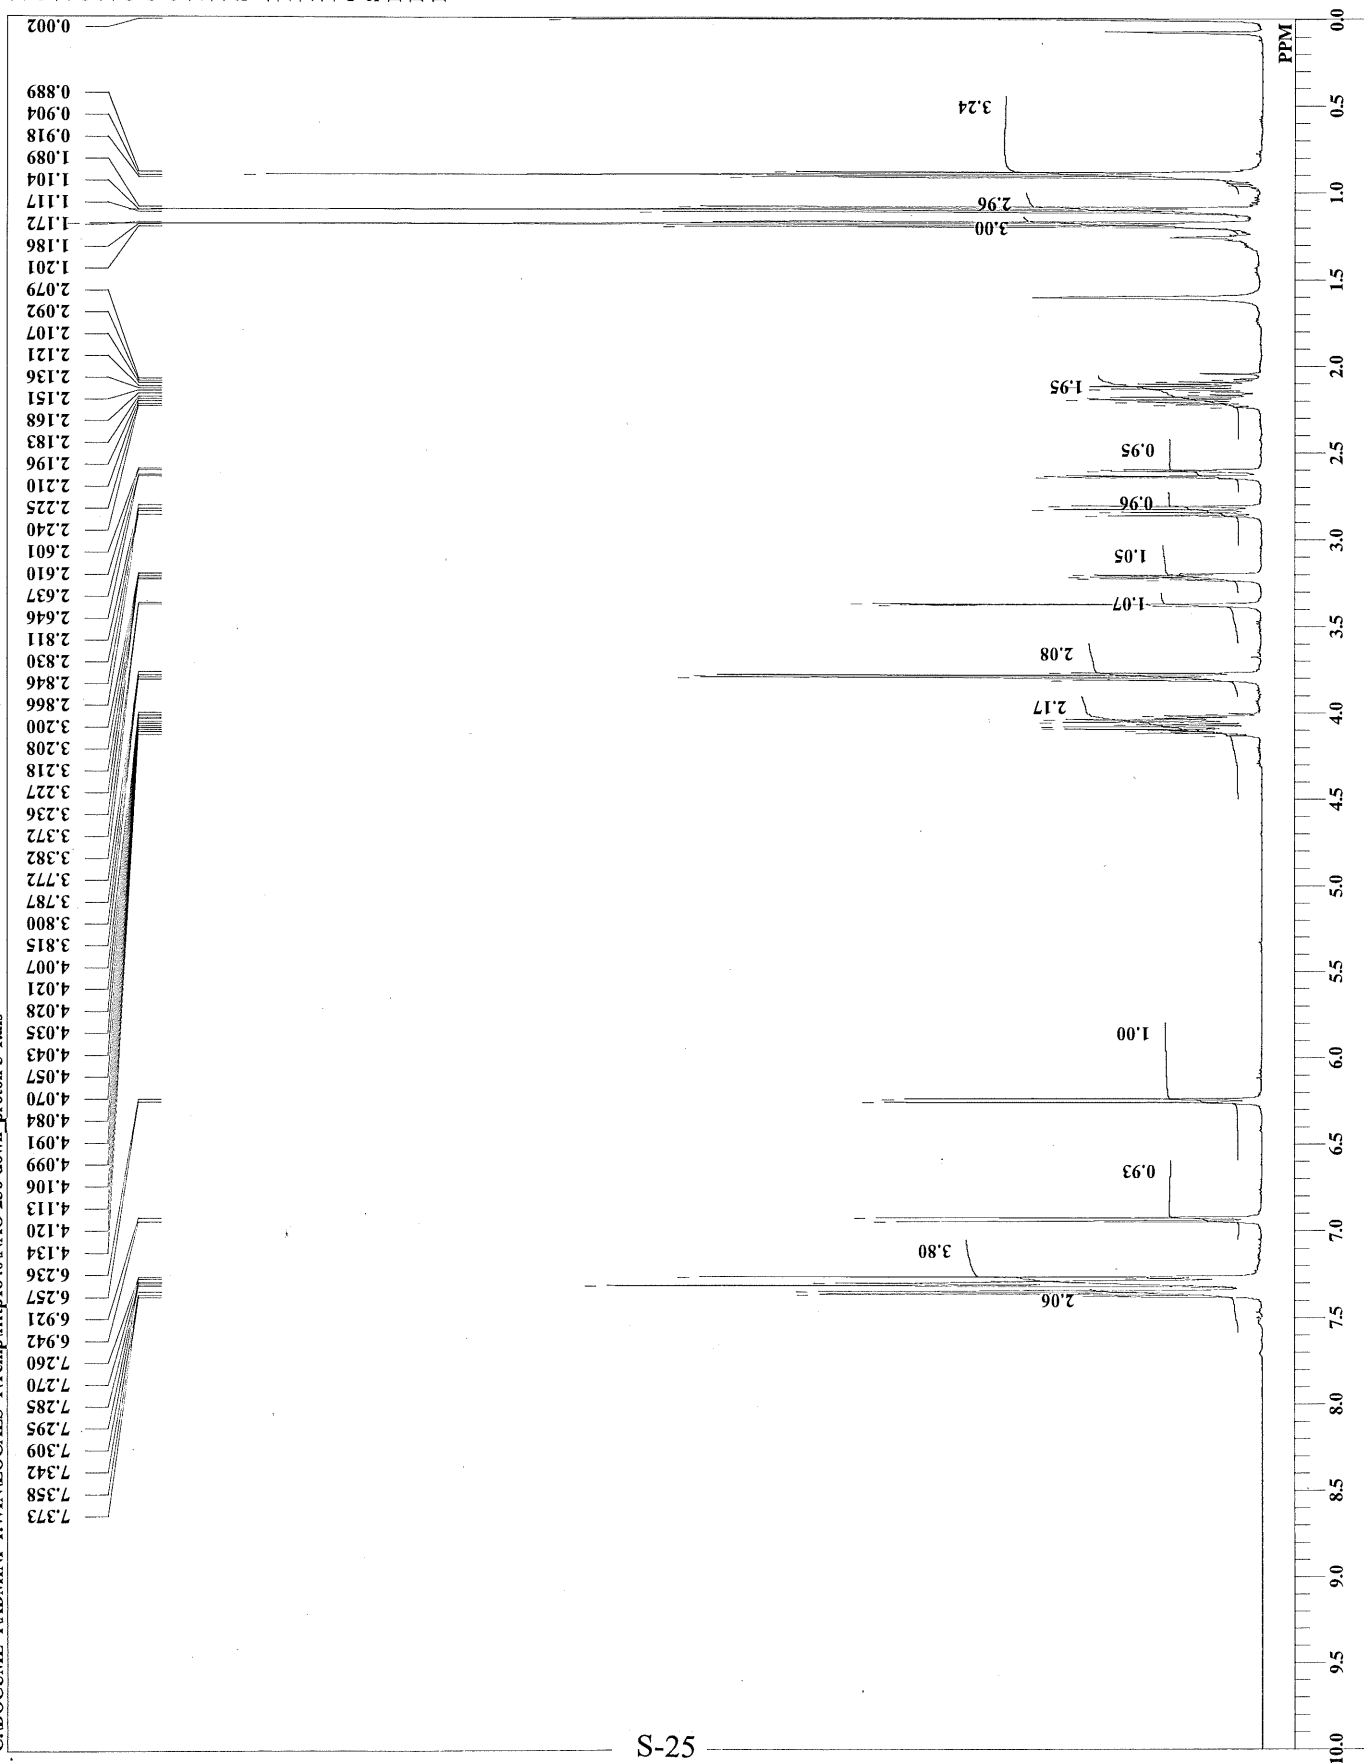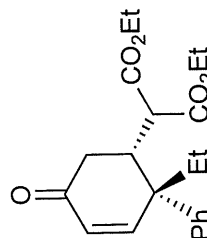

4b  
 1H NMR  
 (500 MHz, CDCl<sub>3</sub>)

C:\DOCUME-1\ADMINI-1\WINLOCALS-1\Temp\ffftp1988\NAO-236-down\_Carbon-1-1.jdf

DFILE NAO-236-down\_Carbon-1-1.jdf  
 COMNT single pulse decoupled gated NOE  
 DATIM 2012-08-07 23:38:60  
 OBNUC <sup>13</sup>C  
 EXMOD carbon.jsp  
 OBFRQ 125.77 MHz  
 OBSET 7.87 KHz  
 OBFIN 4.21 Hz  
 POINT 32780  
 FREQU 39308.18 Hz  
 SCANS 512  
 ACQIM 0.8336 sec  
 PD 2.0000 sec  
 PW1 2.72 usec  
 IRNUC <sup>1</sup>H  
 CTMP 24.0 c  
 SLVNT CDCl<sub>3</sub>  
 EXREF 77.00 ppm  
 BF 0.12 Hz  
 RGAIN 58

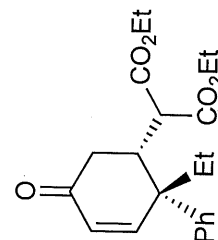

<sup>13</sup>C NMR  
 (125 MHz, CDCl<sub>3</sub>)

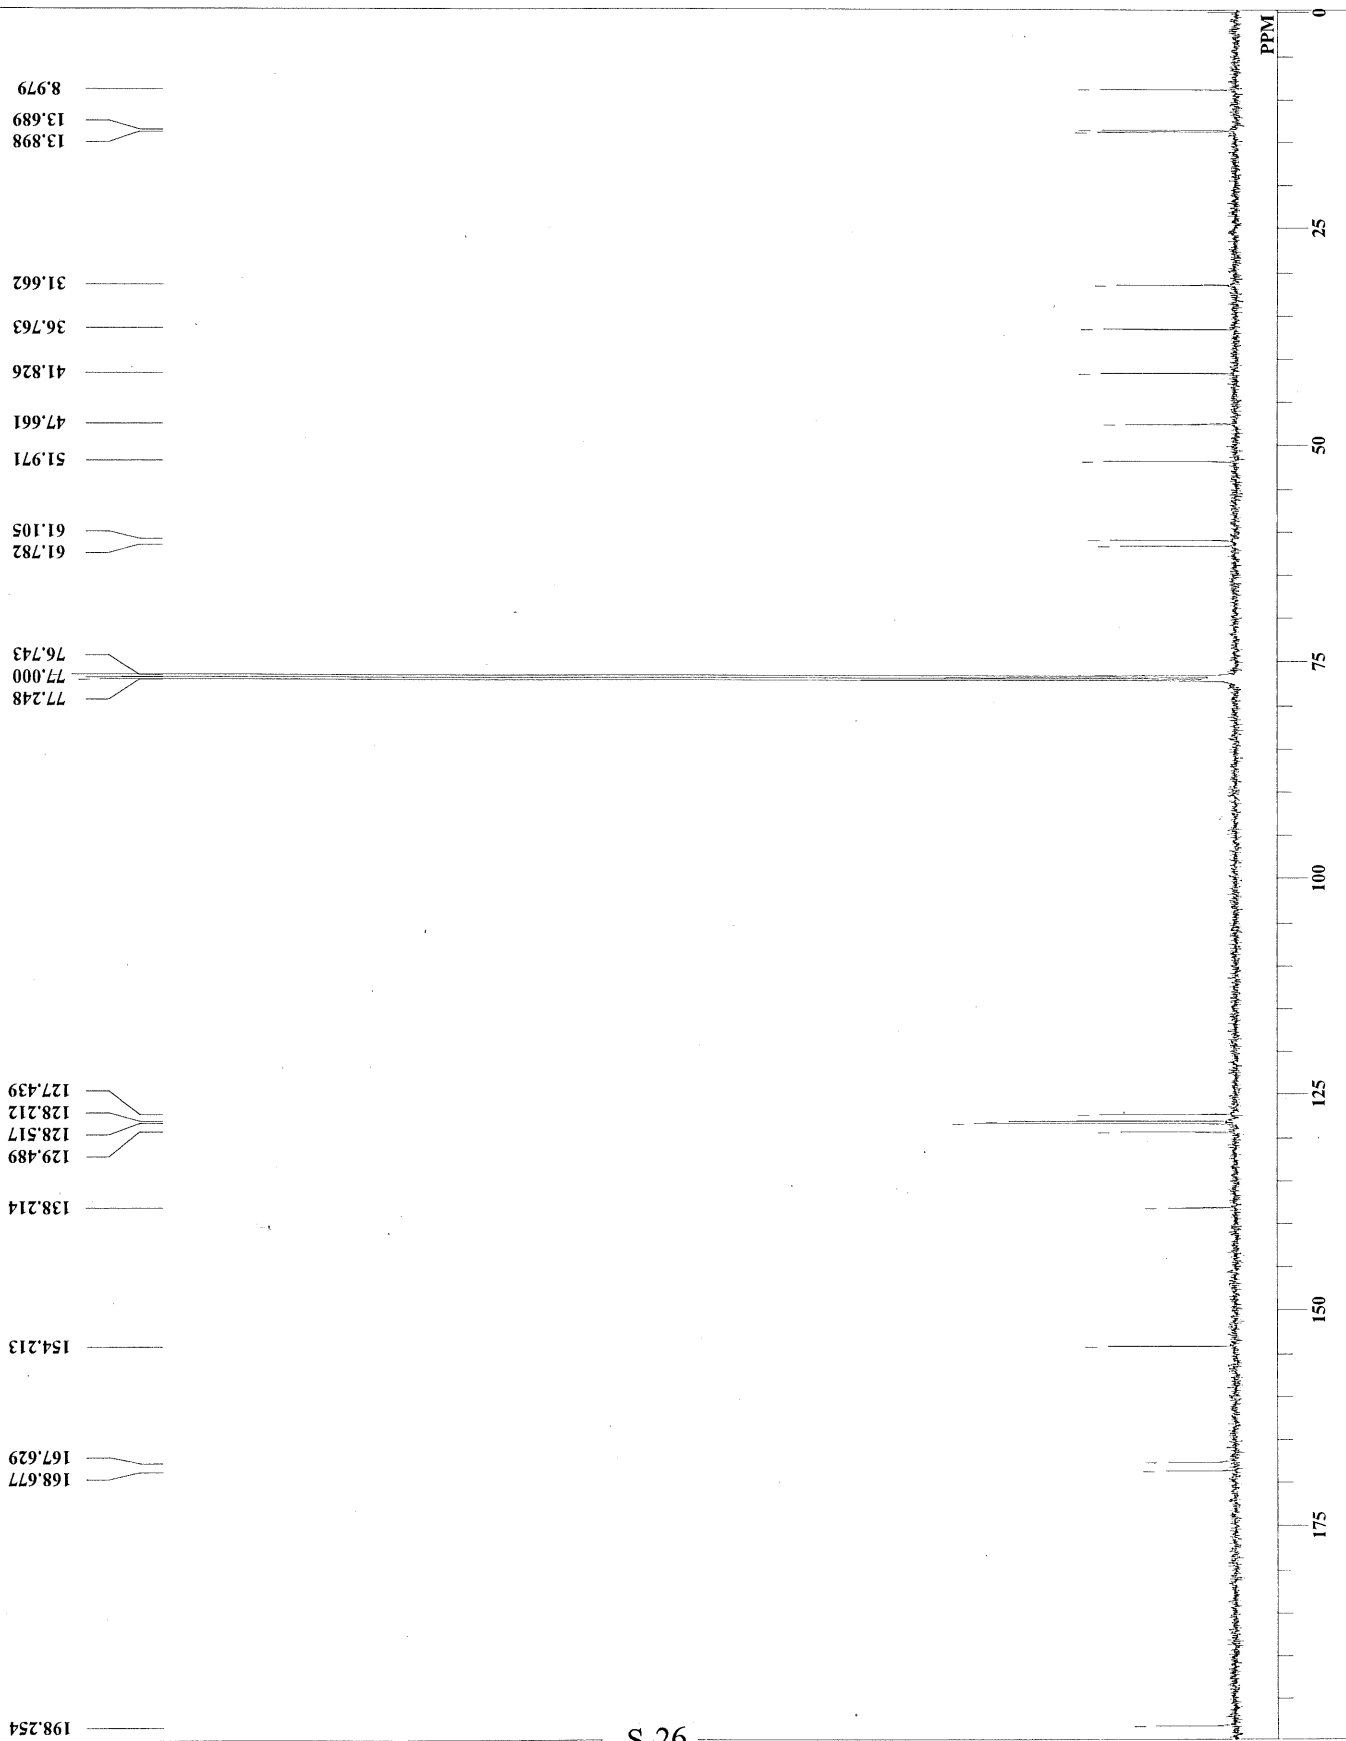

C:\DOCUMENT-1\ADMINI-1\WINLOCALS-1\Temp\fftp1584\NAO-245-up\_proton-4-1.als

DFTLE  
 COMNT  
 DATIM  
 OBNUC  
 EXMOD  
 OBRQ  
 OBSE  
 OBTN  
 POINT  
 FREQU  
 SCANS  
 ACQTM  
 PD  
 PW1  
 IRNUC  
 CTMP  
 SLVNT  
 EXREF  
 BF  
 RGAIN

NAO-245-up\_proton-4-1.als  
 single\_pulse  
 2012-07-25 00:09:03  
 1H  
 proton.jpg  
 500.16 MHz  
 2.41 KHz  
 6.01 Hz  
 13120  
 7507.51 Hz  
 8  
 1.7459 sec  
 5.0000 sec  
 4.68 usec  
 1H  
 22.8 c  
 CDCL3  
 12.51 ppm  
 0.12 Hz  
 42

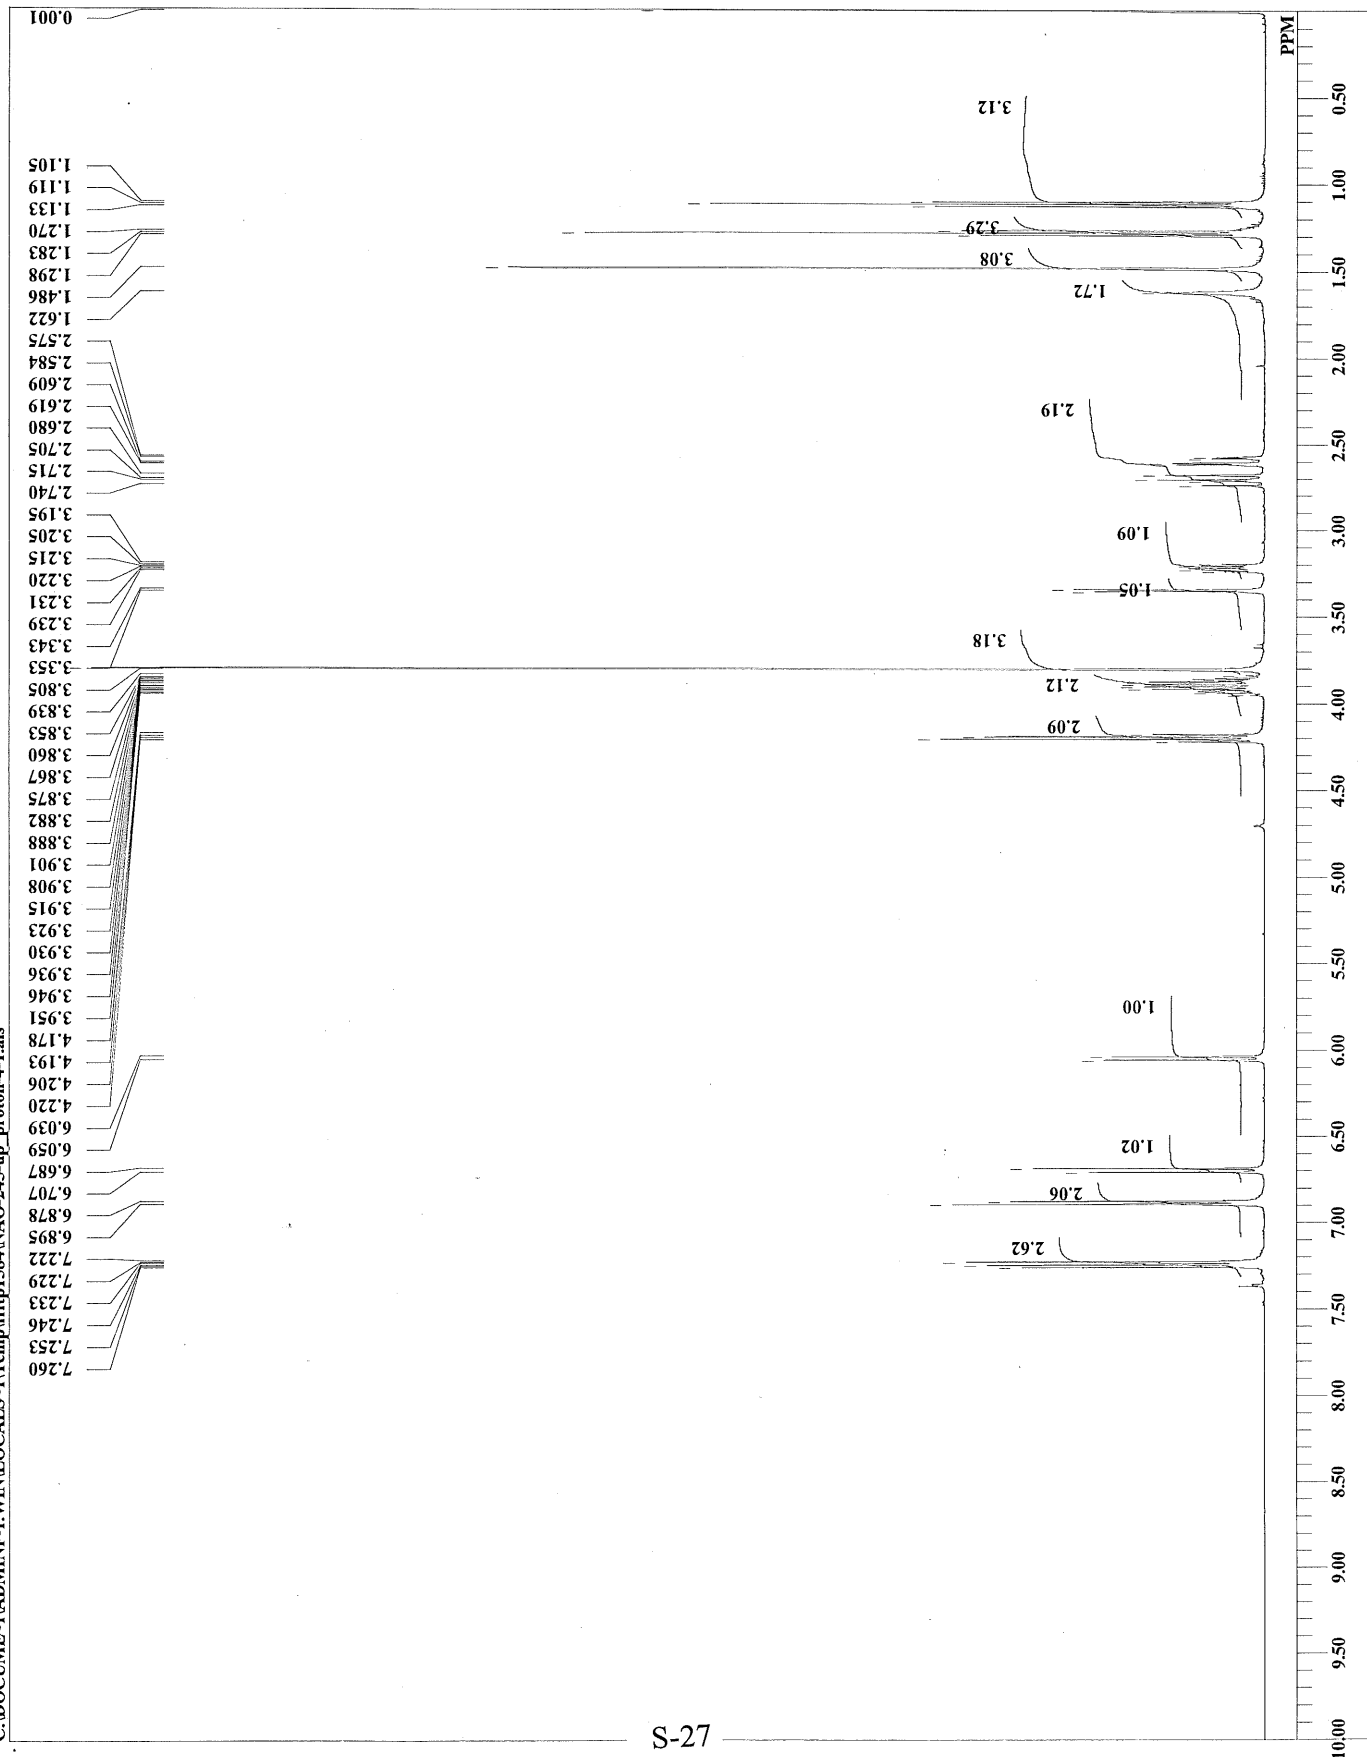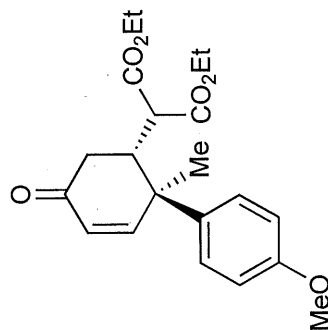

<sup>1</sup>H NMR  
 (500 MHz, CDCl<sub>3</sub>)

C:\DOCUMENT-1\ADMINI-1\WINLOCALS-1\Temp\ffftp1584\NAO-245-up\_Carbon-3-1.jdf

DFILE  
COMNT  
DATIM  
OBNUC  
EXMOD  
OBFRO  
OBSET  
OBFIN  
POINT  
FREQU  
SCANS  
ACQTM  
PD  
PWI  
IRNUC  
CTEMP  
SLVNT  
EXREF  
BF  
RGAIN

NAO-245-up\_Carbon-3-1.jdf  
single pulse decoupled gated NOE  
2012-07-24 22:31:60  
13C  
carbon.jpg  
125.77 MHz  
7.87 KHz  
4.21 Hz  
32780  
39308.18 Hz  
256  
0.8336 sec  
2.0000 sec  
2.72 usec  
1H  
22.5 c  
CDCl3  
77.00 ppm  
0.12 Hz  
60

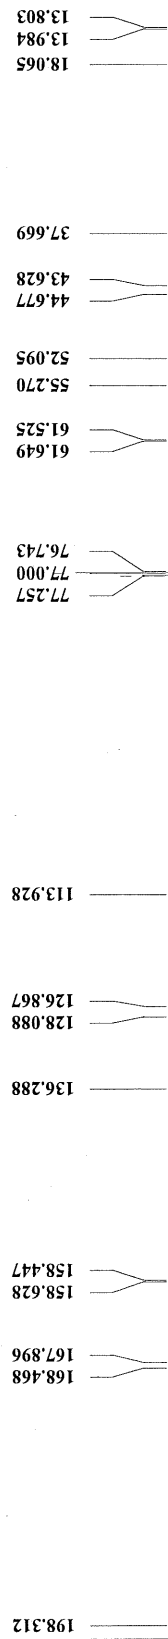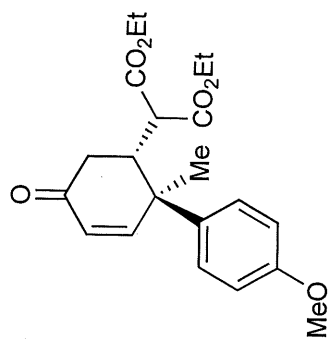

**3c**  
<sup>13</sup>C NMR  
(125 MHz, CDCl<sub>3</sub>)

DFILE  
COMNT  
DATIM  
OBNUC  
EXMOD  
OBFRO  
OBFET  
OBFIN  
POINT  
FREQU  
SCANS  
ACQIM  
PD  
PWI  
IRNUC  
CTEMP  
SLVNT  
EXREF  
BF  
RGAIN

NAO-245-down\_proton-5-1.als  
single\_pulse  
2012-08-30 11:55:45  
1H  
proton.jpg  
500.16 MHz  
2.41 KHz  
6.01 Hz  
13120  
7507.51 Hz  
8  
1.7459 sec  
5.0000 sec  
4.68 usec  
1H  
22.3 c  
CDCL3  
12.51 ppm  
0.12 Hz  
48

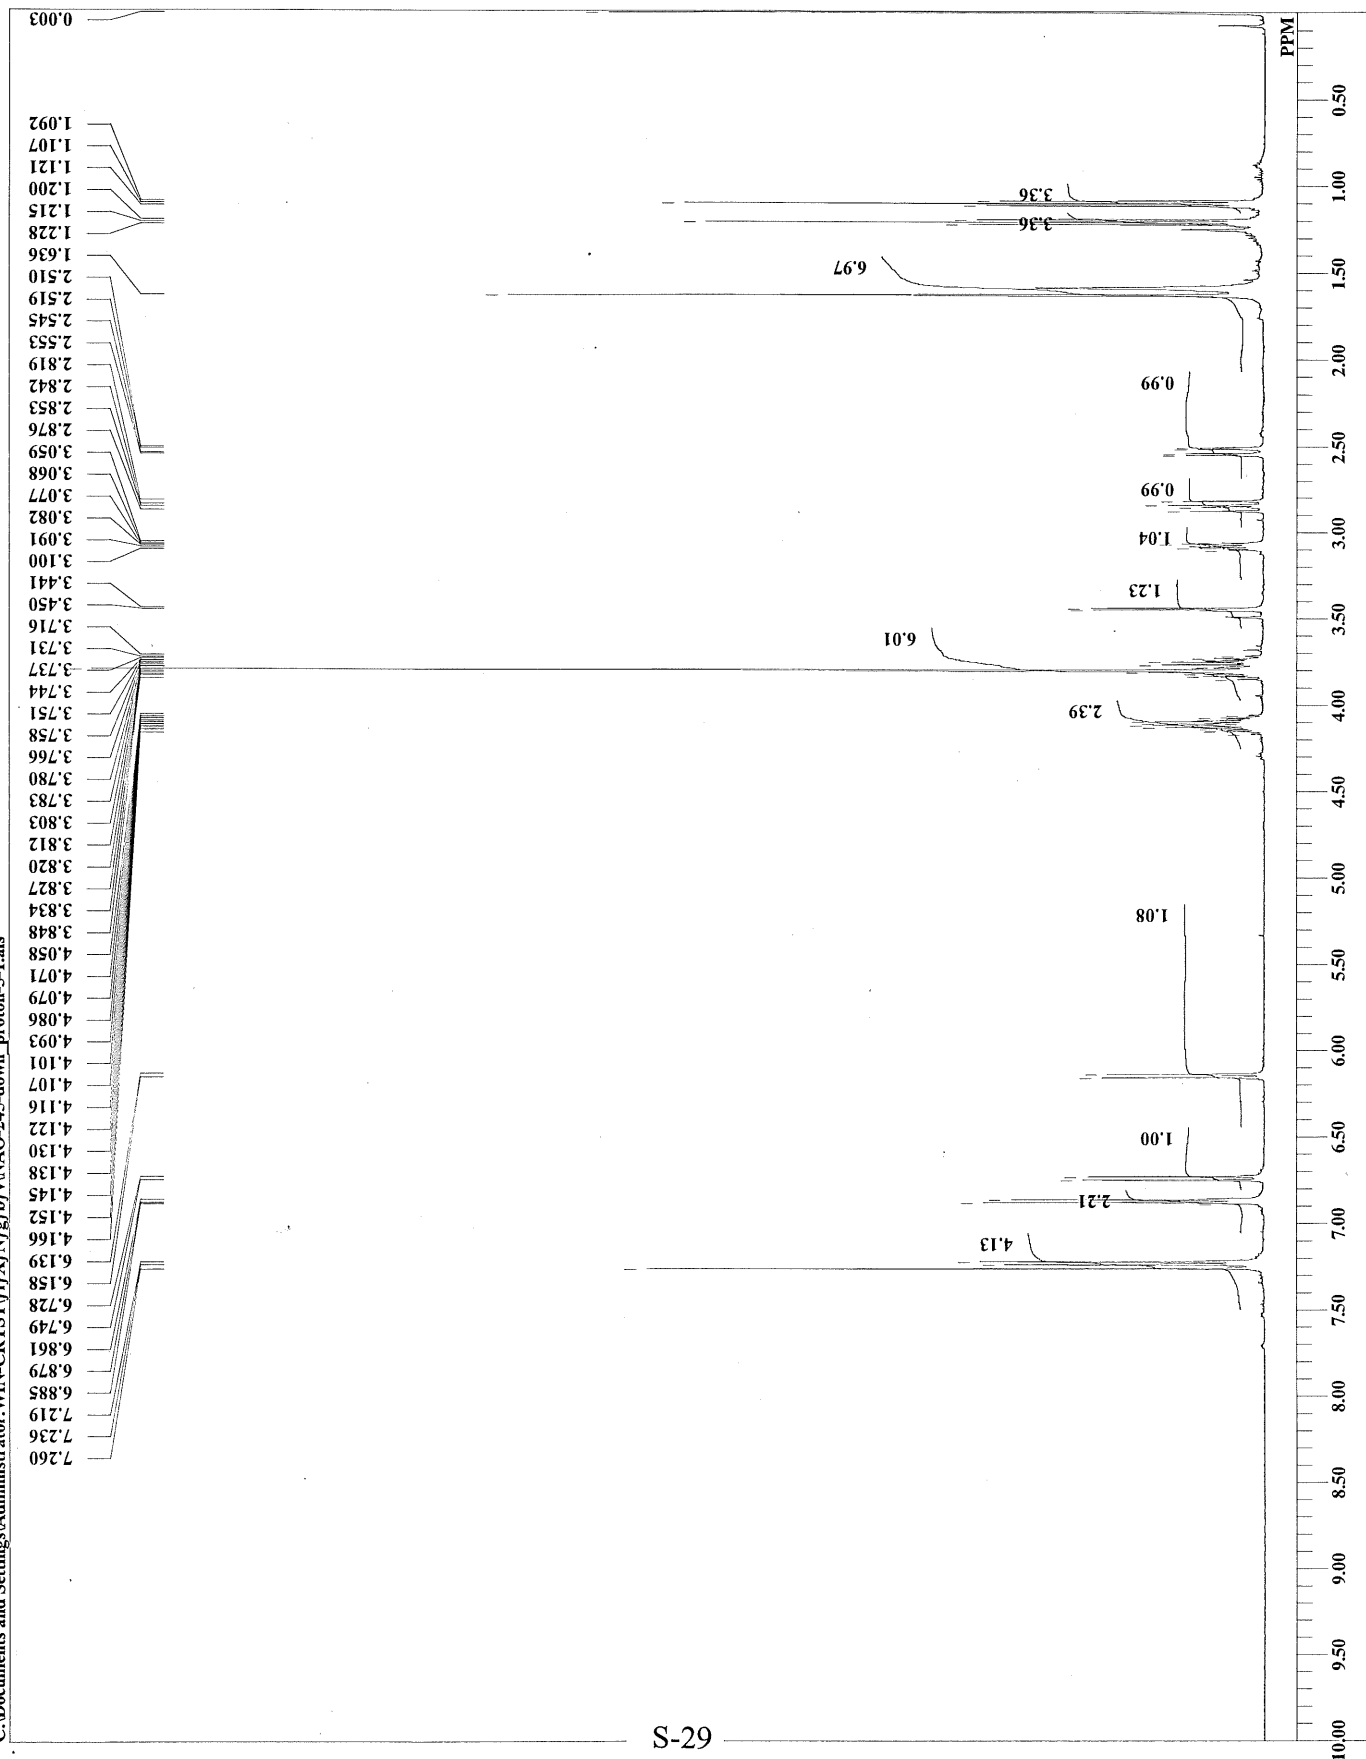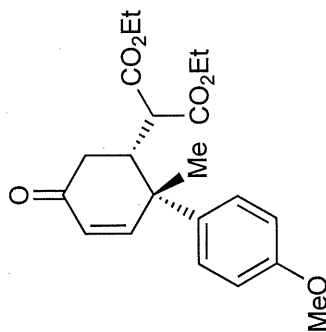

4c  
1H NMR  
(500 MHz, CDCl<sub>3</sub>)

C:\DOCUMENT-1\ADMINI-1\WINLOCALS-1\Temp\ffitp1584\NAR-33-30-down\_Carbon-1-1.jdf

DFILE NAR-33-30-down\_Carbon-1-1.jdf  
 COMNT single pulse decoupled gated NOE  
 DATIM 2012-08-22 20:41:05  
 OENUC <sup>13</sup>C  
 EXMOD carbon.jxp  
 OBPRQ 125.77 MHz  
 OBSST 7.87 KHz  
 OBFIN 4.21 Hz  
 POINT 32780  
 FREQU 39308.18 Hz  
 SCANS 1024  
 ACQTM 0.8336 sec  
 PD 2.0000 sec  
 PW1 2.72 usec  
 IRNUC <sup>1</sup>H  
 CTMP 23.0 c  
 SLVNT CDCl<sub>3</sub>  
 EXREF 77.00 ppm  
 BF 0.12 Hz  
 RGAIN 56

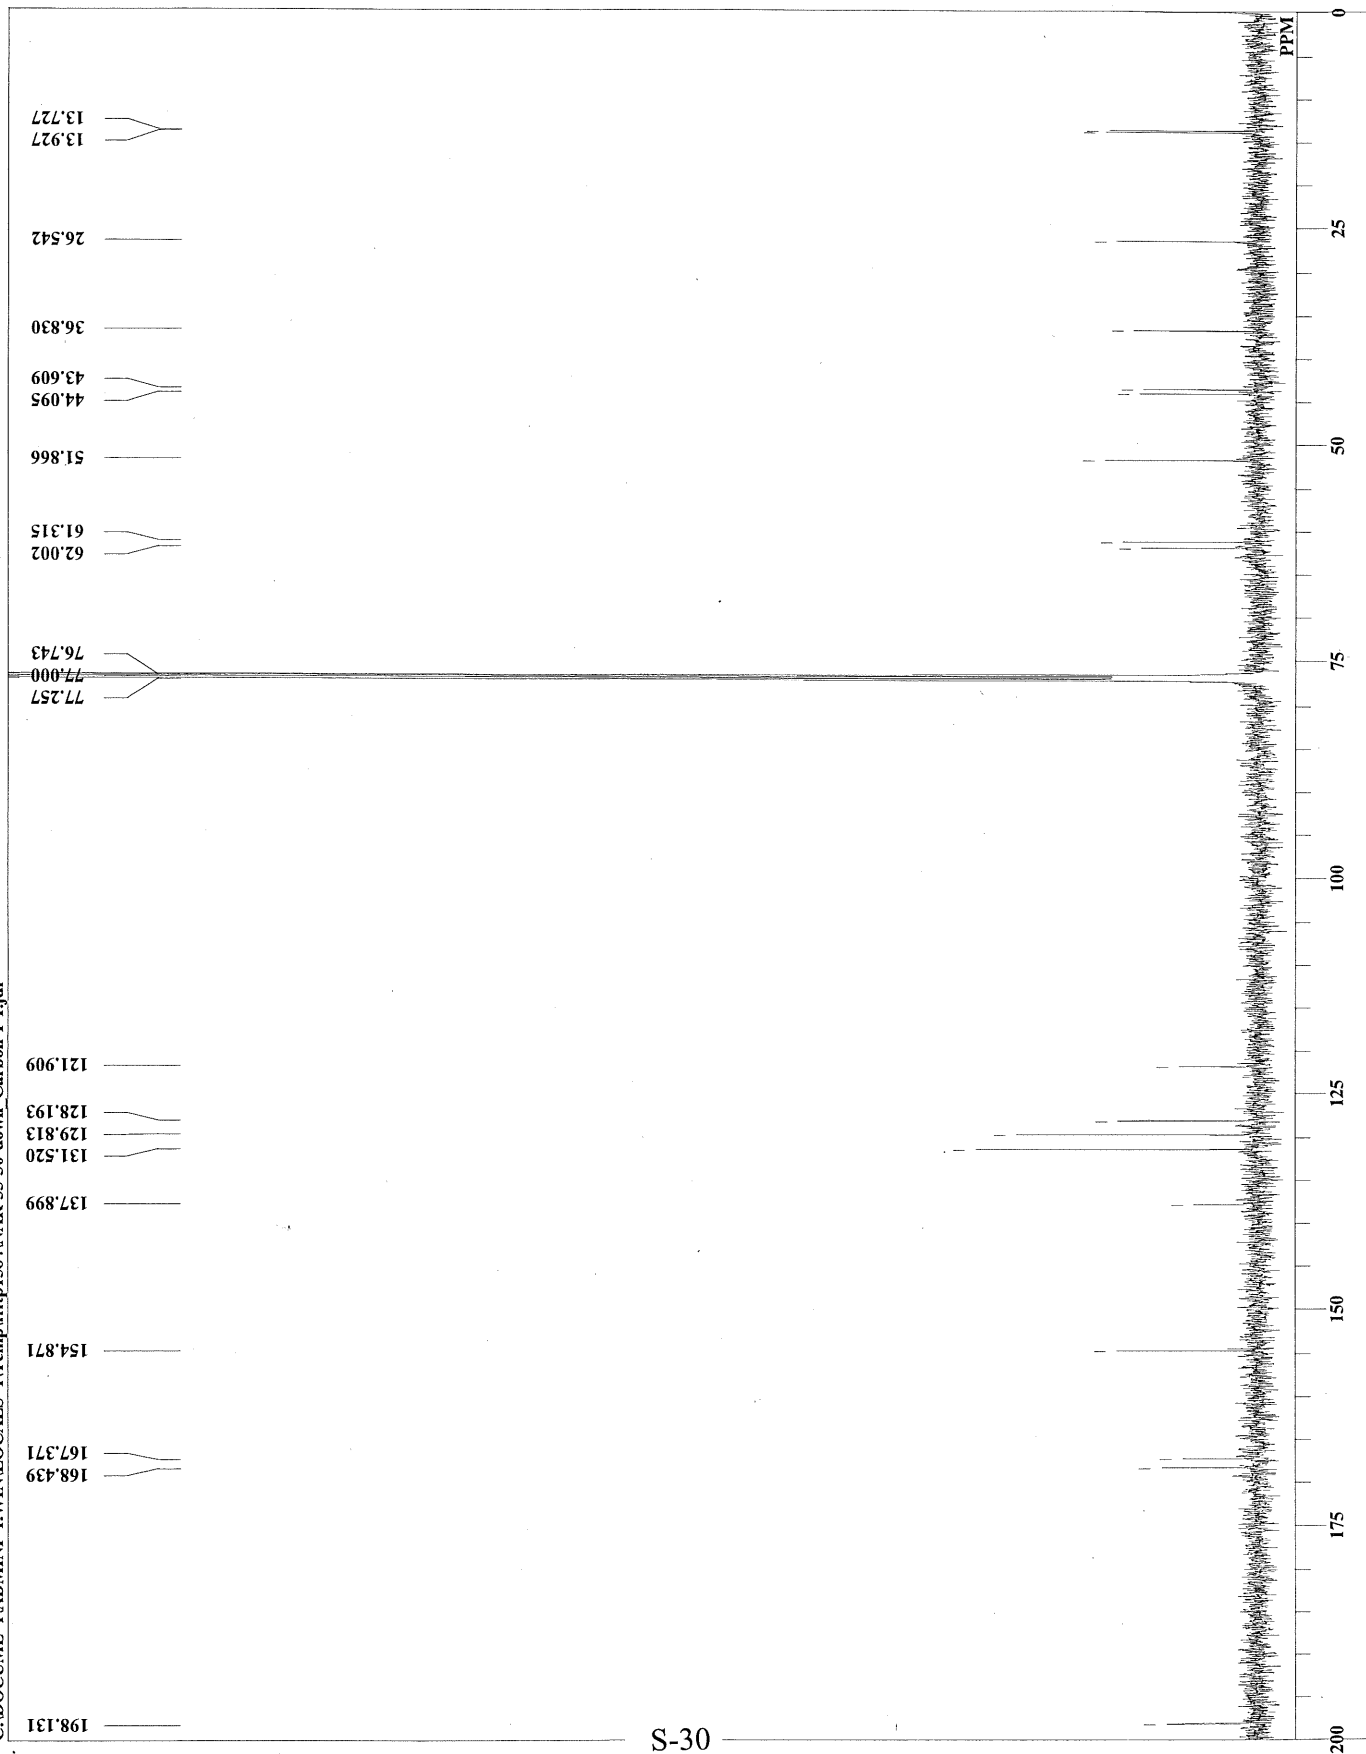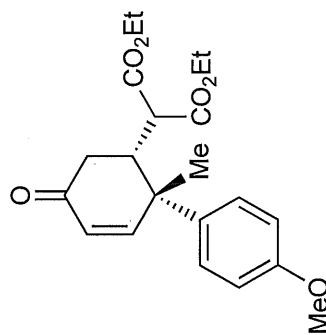

**4c**  
<sup>13</sup>C NMR  
 (125 MHz, CDCl<sub>3</sub>)

DFLE  
COMNT  
DATIM  
OBNUC  
EXMOD  
OBFRO  
OBSET  
OBFIN  
POINT  
FREQU  
SCANS  
ACQIM  
PD  
PWI  
IRNUC  
CTEMP  
SLVNT  
EXREF  
BF  
RGAIN

NAR-33-up\_proton-2-1.als  
single\_pulse  
2012-09-28 22:44:38  
1H  
proton.jpg  
500.16 MHz  
2.41 KHz  
6.01 Hz  
13120  
7507.51 Hz  
8  
1.7459 sec  
5.0000 sec  
4.68 usec  
1H  
20.4 c  
CDCL3  
12.51 ppm  
0.12 Hz  
40

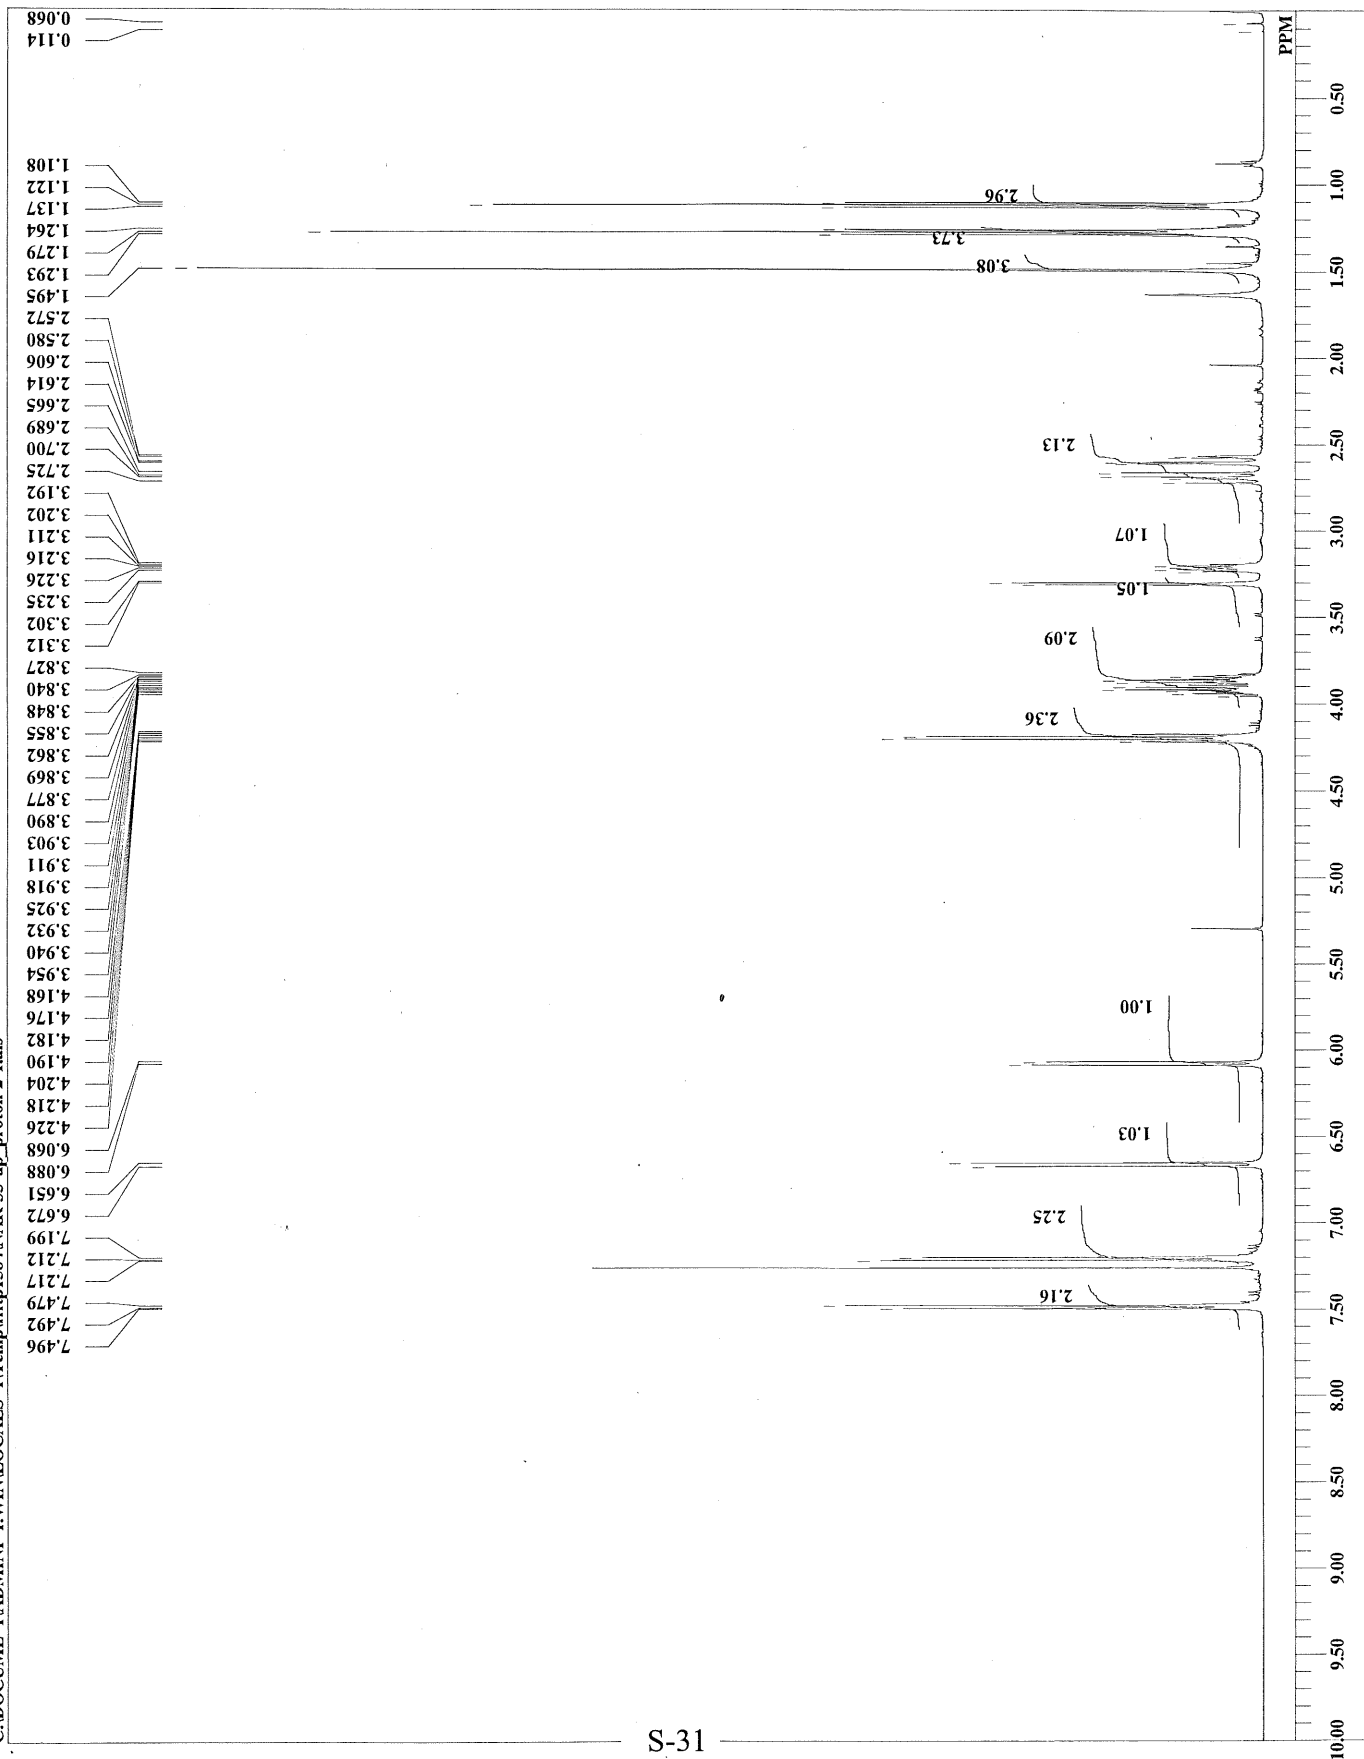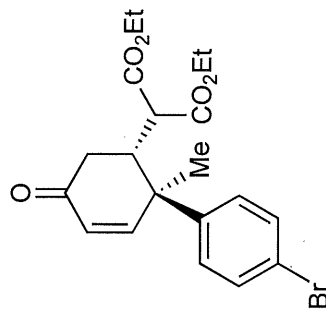

**3d**  
<sup>1</sup>H NMR  
(500 MHz, CDCl<sub>3</sub>)

C:\DOCUME~1\ADMINI~1\WINLOCALS~1\Temp\ffftp1584\NAR-33-12-13\_Carbon-1-1.jdf

DFILE NAR-33-12-13\_Carbon-1-1.jdf  
 COMNT single pulse decoupled gated NOE  
 DATIM 2012-08-22 20:13:16  
 OBNUC <sup>13</sup>C  
 EXMOD carbon.jxp  
 OBFRQ 125.77 MHz  
 OBSFQ 7.87 KHz  
 OBFIN 4.21 Hz  
 POINT 32780  
 FREQU 39308.18 Hz  
 SCANS 256  
 ACQIM 0.8336 sec  
 PD 2.0000 sec  
 PWI 2.72 usec  
 IRNUC <sup>1</sup>H  
 CTEMP 23.0 c  
 SLVNT CDCL<sub>3</sub>  
 EXREF 77.00 ppm  
 BF 0.12 Hz  
 RGAIN 60

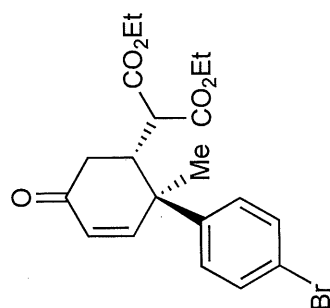

<sup>13</sup>C NMR  
 (125 MHz, CDCl<sub>3</sub>)

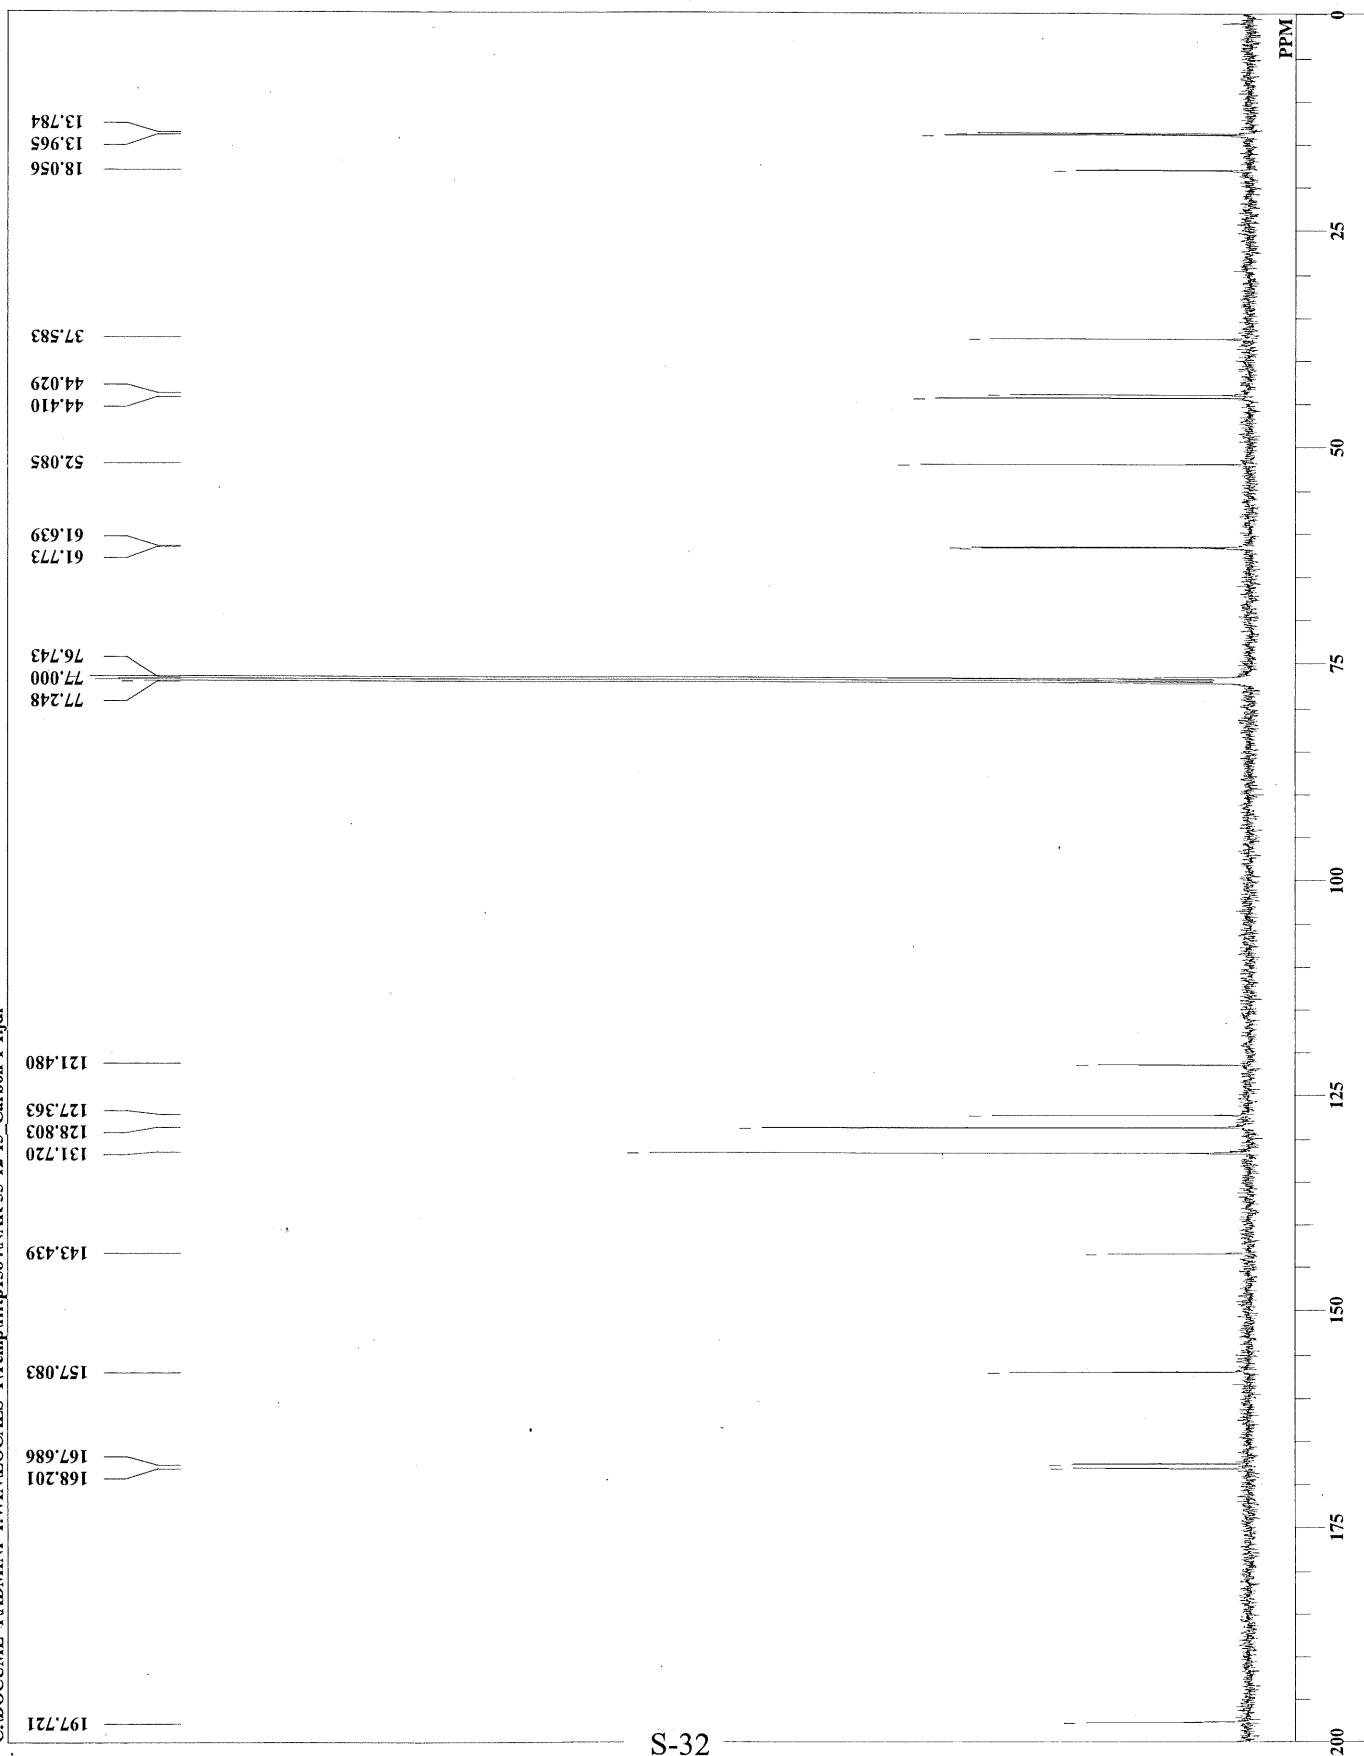

C:\DOCUME-1\ADMINI-1\WINLOCALS-1\Temp\ffftp1584\NAR-33-down\_proton-1-1.als

DFILE  
COMNT  
DATIM  
OBNUC  
EXMOD  
OBFRO  
OBSER  
OBFIN  
POINT  
FREQU  
SCANS  
ACQTM  
PD  
PWI  
IRNUC  
CTEMP  
SLVNT  
EXREF  
BF  
RGAIN

NAR-33-down\_proton-1-1.als  
single\_pulse  
2012-09-29 09:32:22  
1H  
proton.jpg  
500.16 MHz  
2.41 KHz  
6.01 Hz  
13120  
7507.51 Hz  
8  
1.7459 sec  
5.0000 sec  
4.68 usec  
1H  
20.2 c  
CDCL3  
12.51 ppm  
0.12 Hz  
50

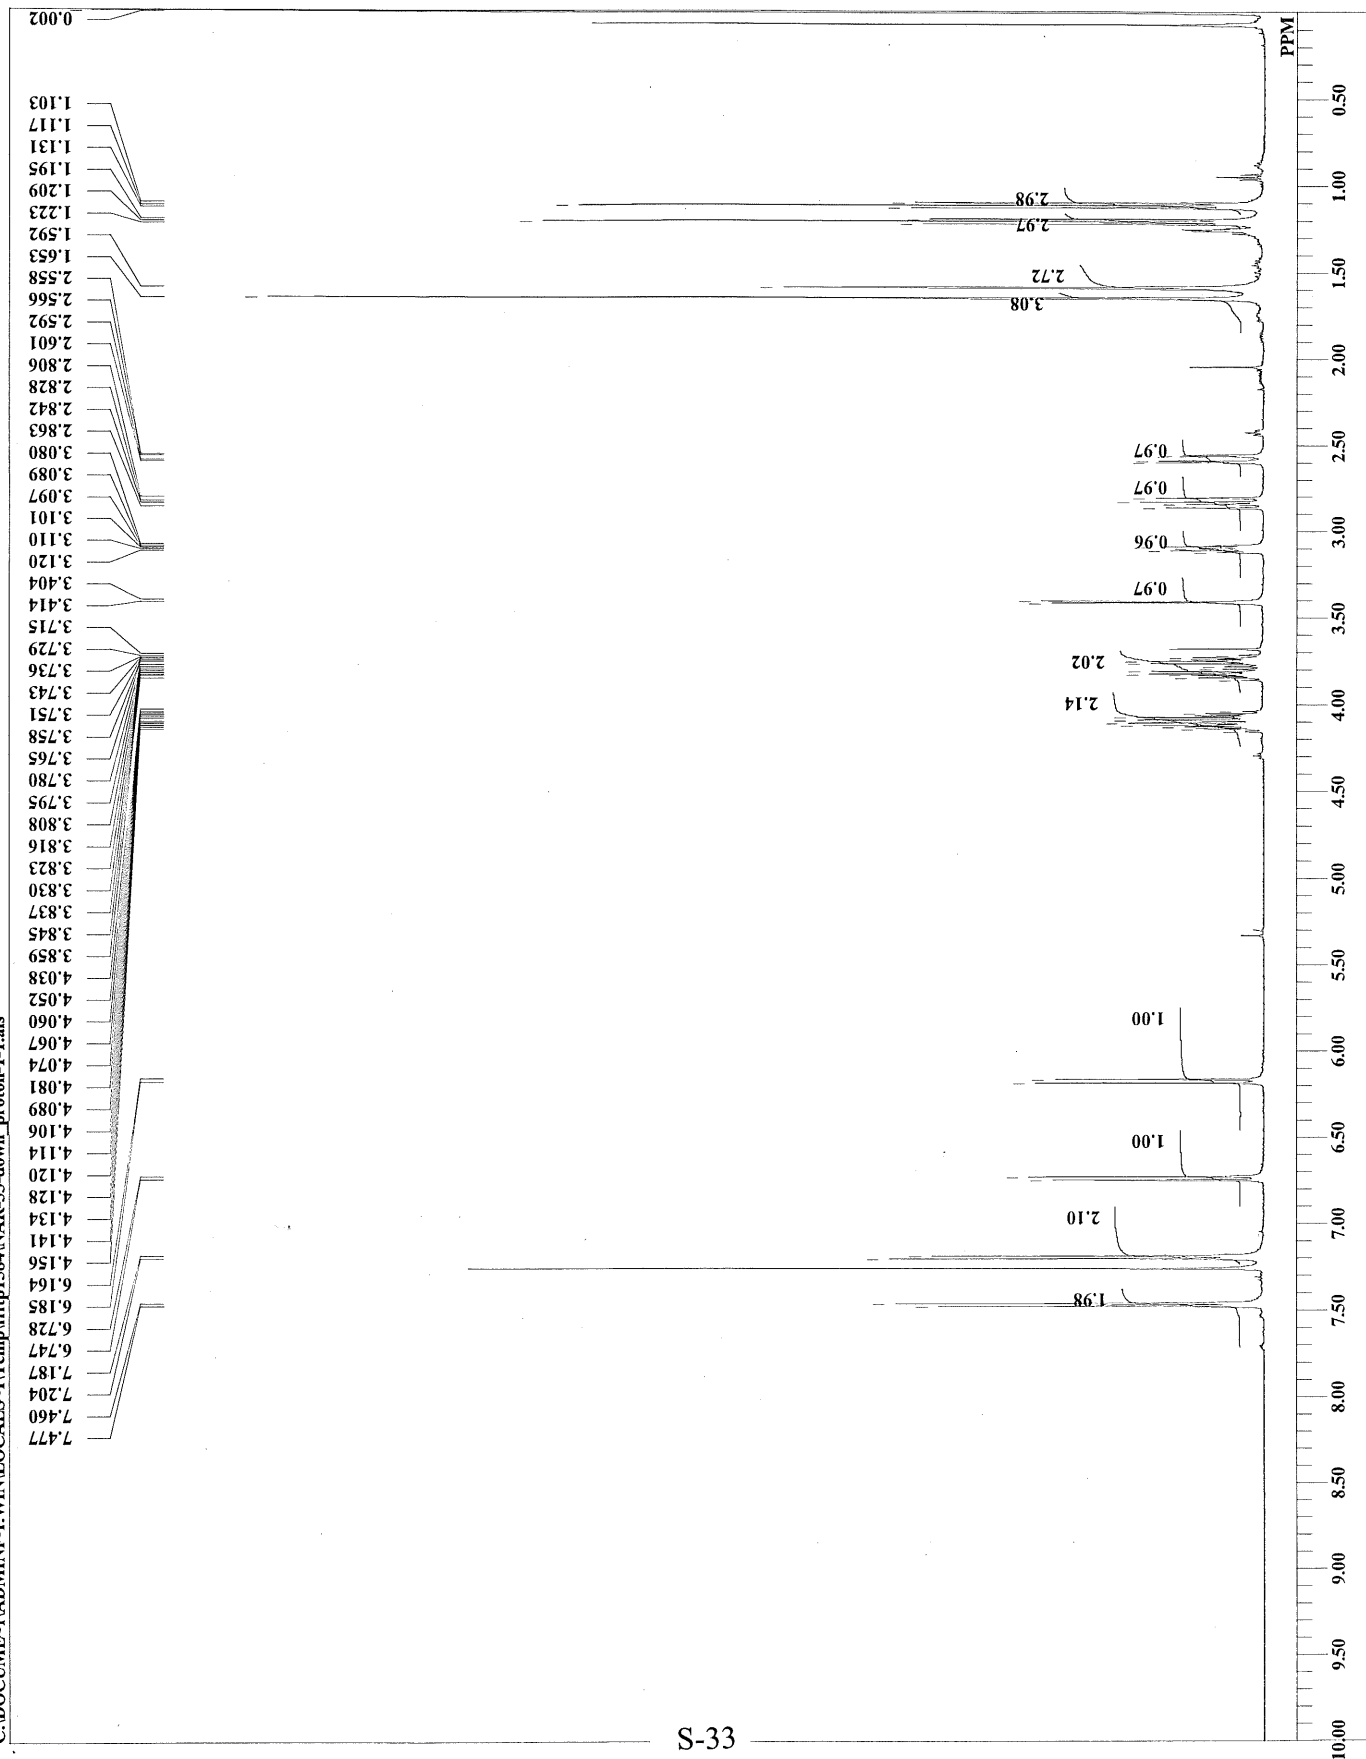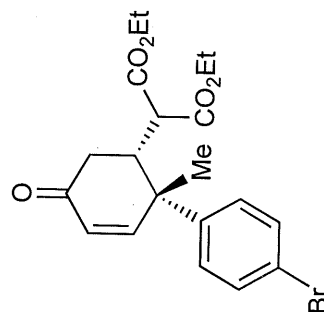

<sup>1</sup>H NMR  
(500 MHz, CDCl<sub>3</sub>)

C:\DOCUME~1\ADMINI~1\WINLOCALS~1\Temp\ffftip1584\NAO-245-down\_Carbon-1-1.jdf

DFILE COMNT  
 DATIM  
 OBNUC  
 EXMOD  
 OBFRO  
 OBSET  
 OBFIN  
 POINT  
 FREQU  
 SCANS  
 ACQTM  
 PD  
 PW1  
 IRNUC  
 CTMP  
 SLVNT  
 EXREF  
 BF  
 RGAIN

NAO-245-down\_Carbon-1-1.jdf  
 single pulse decoupled gated NOE  
 2012-07-24 22:59:07  
 13C  
 carbon.jpg  
 125.77 MHz  
 7.87 KHz  
 4.21 Hz  
 32780  
 39308.18 Hz  
 512  
 0.8336 sec  
 2.0000 sec  
 2.72 usec  
 1H  
 22.8 c  
 CDCL3  
 77.00 ppm  
 0.12 Hz  
 58

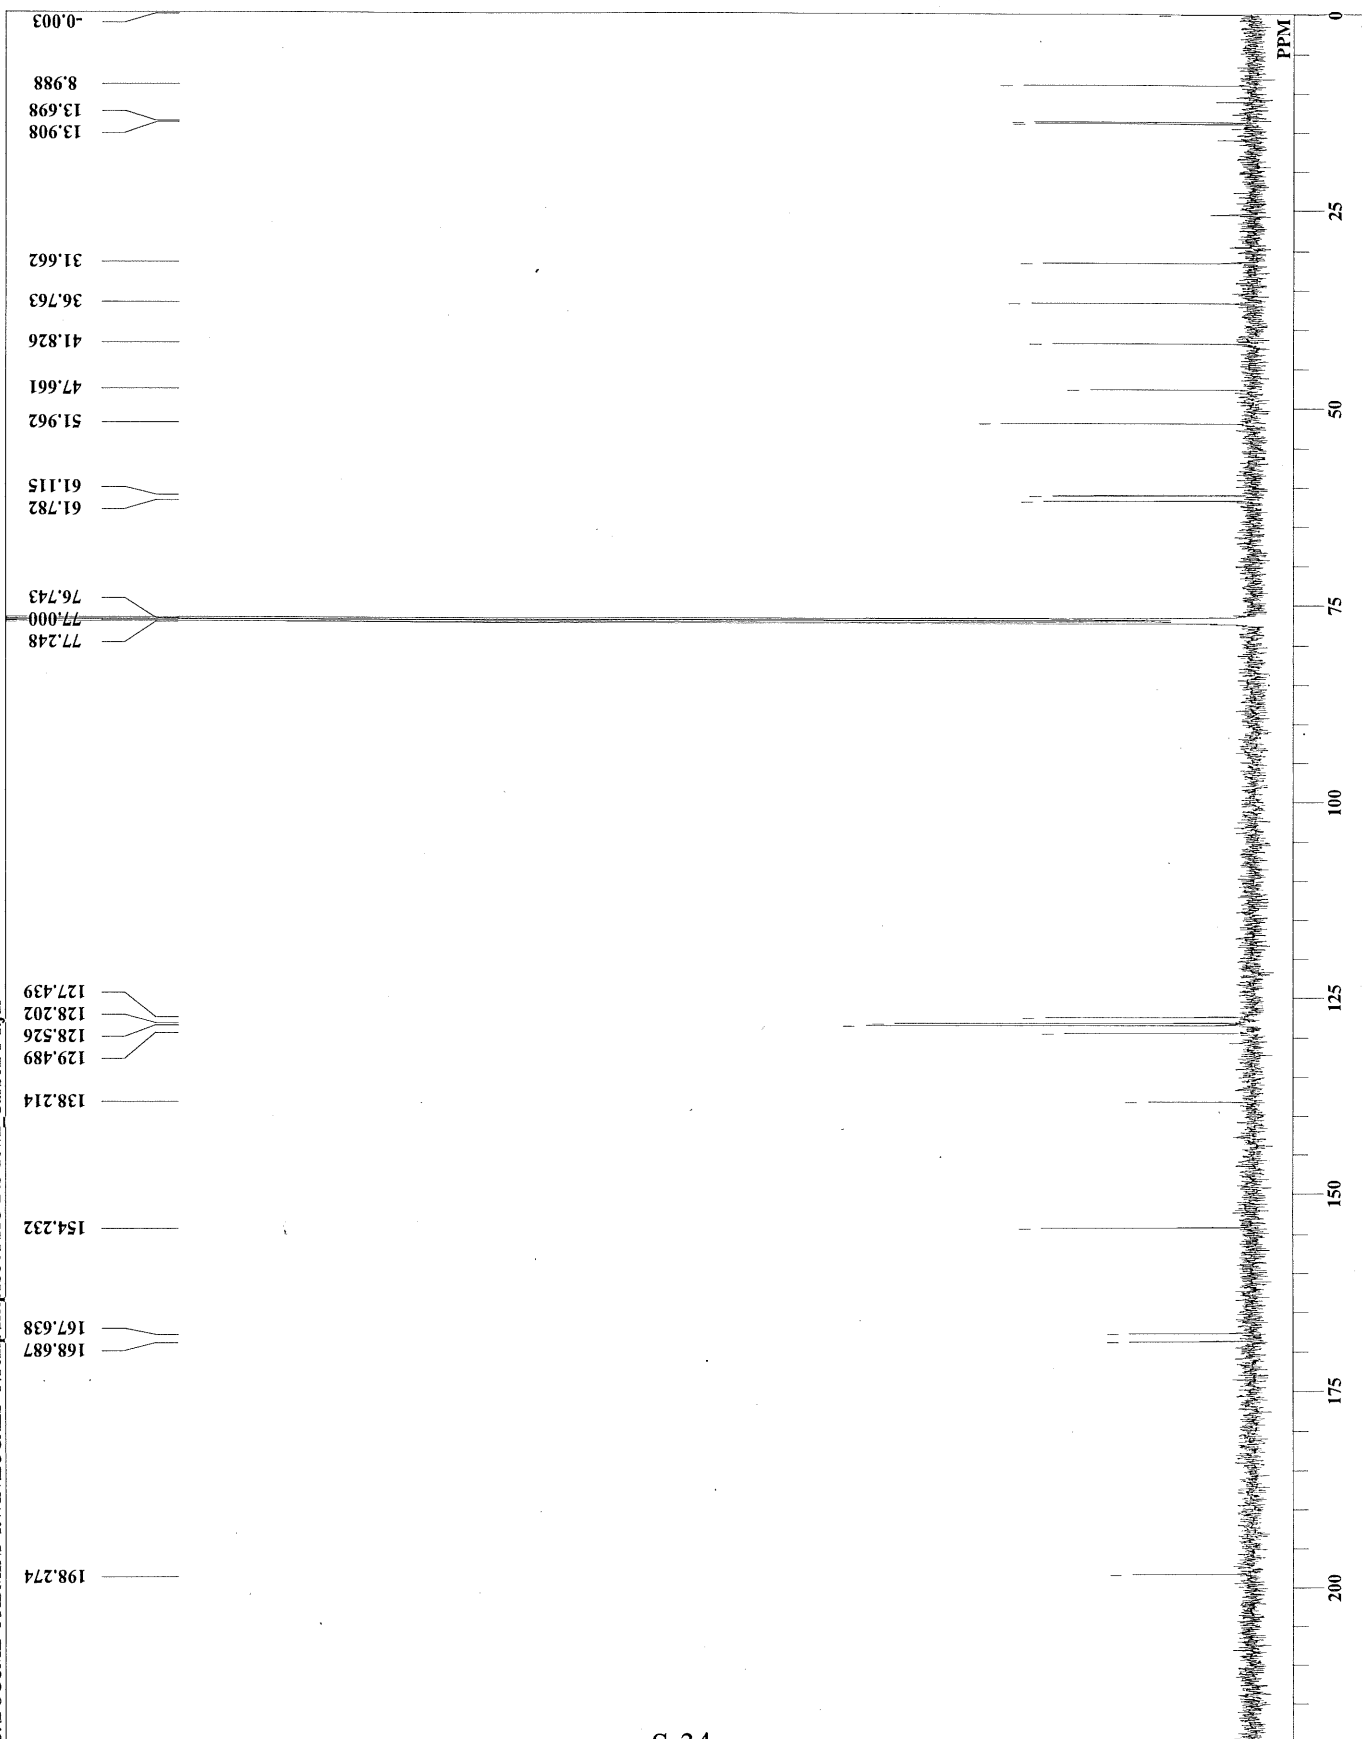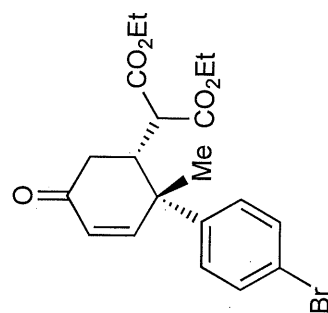

4d  
<sup>13</sup>C NMR  
 (125 MHz, CDCl<sub>3</sub>)

C:\DOCUME~1\ADMINI~1\WINLOCALS~1\Temp\ffftp1584\NAO-251-up\_proton-2-1.als

DFLE  
COMNT  
DATIM  
OBNUC  
EXMOD  
OBFRO  
OBFET  
OBFIN  
POINT  
FREQU  
SCANS  
ACQTM  
PD  
PWI  
IRNUC  
CTEMP  
SLVNT  
EXREF  
BF  
RGAIN

NAO-251-up\_proton-2-1.als  
single\_pulse  
2012-08-29 15:19:59  
1H  
proton.jxp  
500.16 MHz  
2.41 KHz  
6.01 Hz  
13120  
7507.51 Hz  
8  
1.7459 sec  
5.0000 sec  
4.68 usec  
1H  
22.0 c  
CDCL3  
7.26 ppm  
0.12 Hz  
38

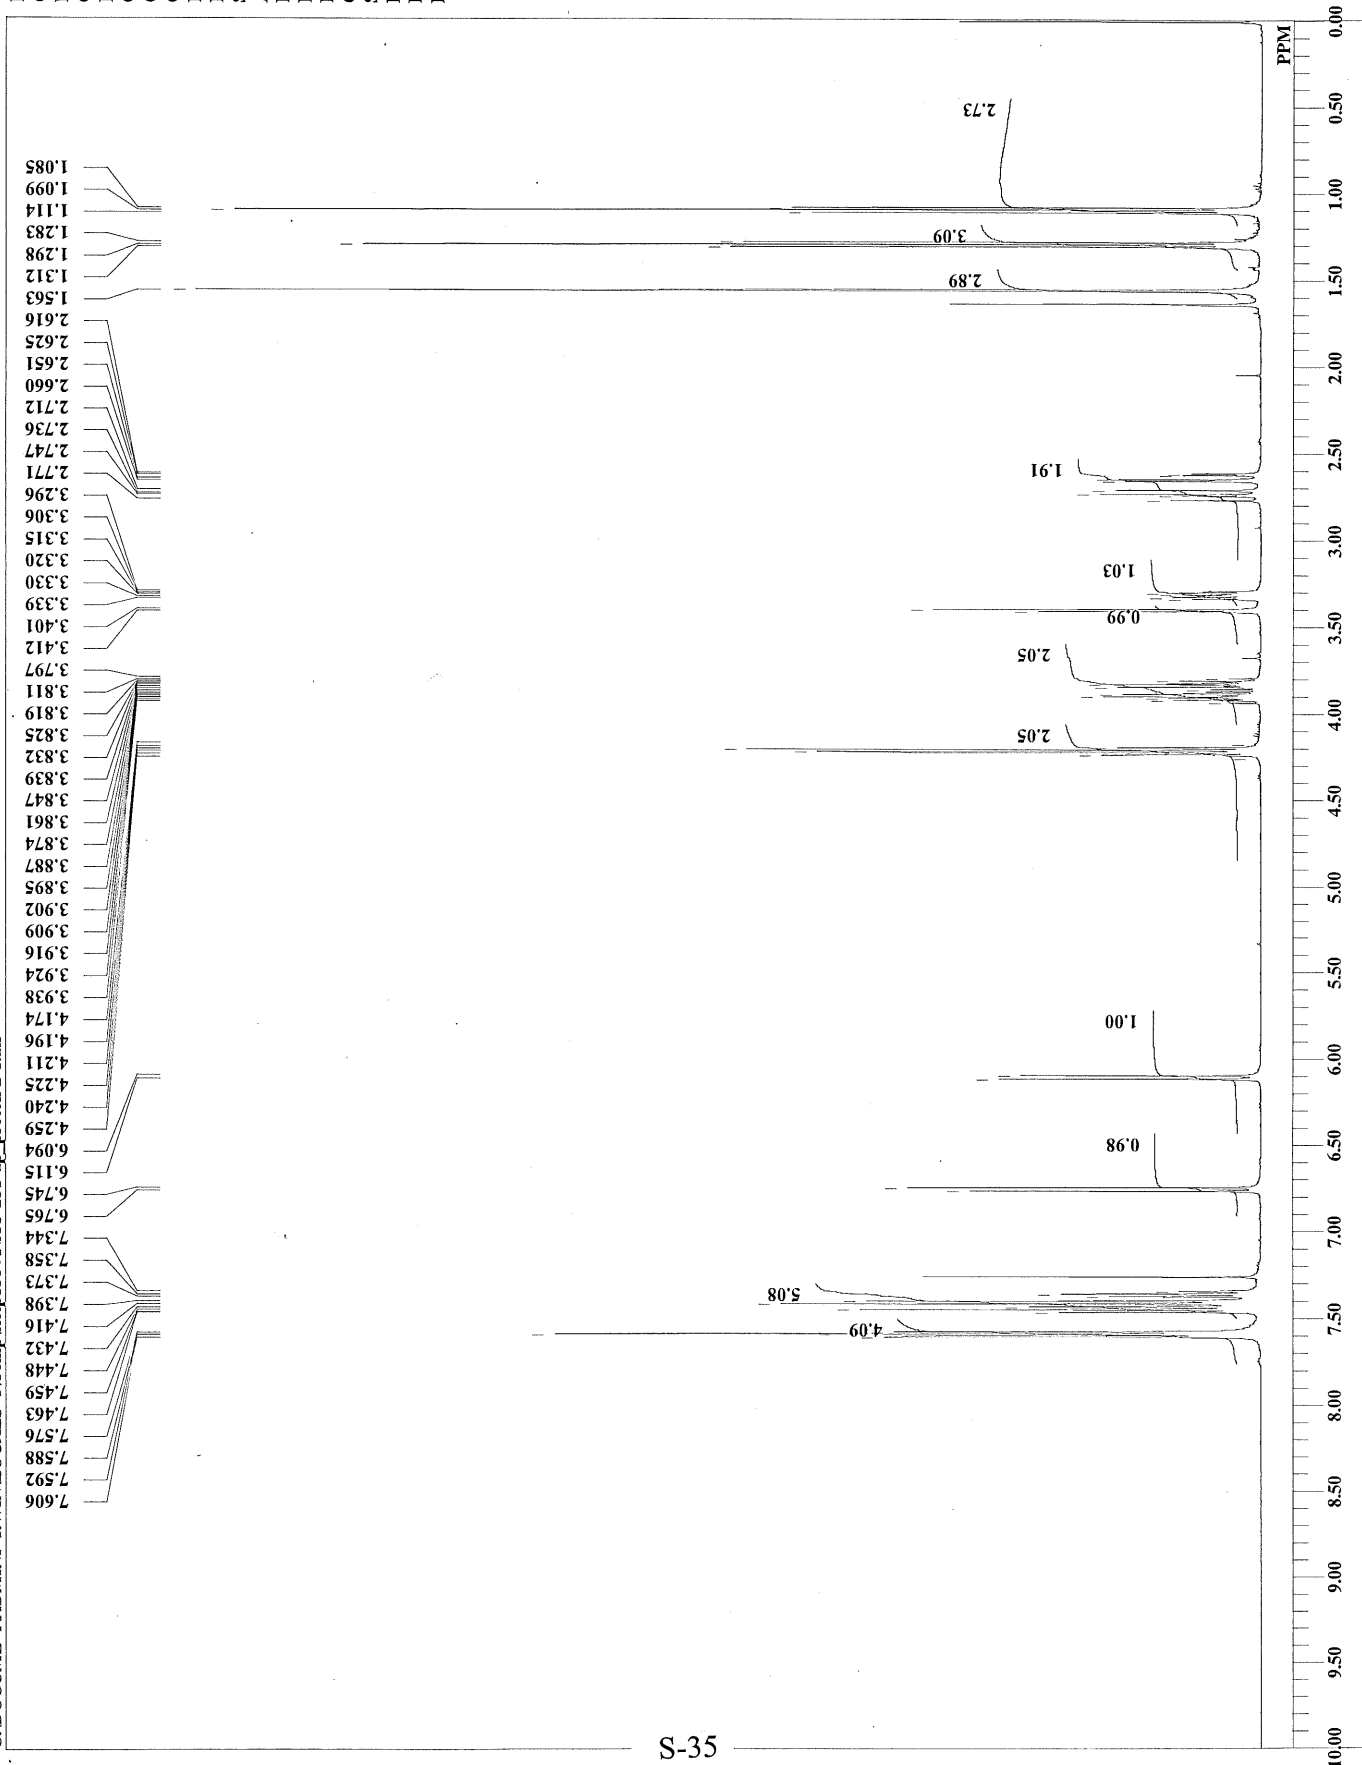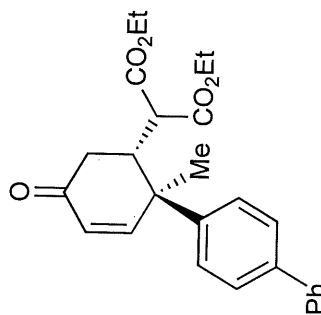

3e  
1H NMR  
(500 MHz, CDCl<sub>3</sub>)

C:\DOCUME~1\ADMINI~1\WINLOCALS~1\Temp\ffftp1584\NAO-251-up\_Carbon-1-1.als

DFILE  
COMNT  
DATIM  
OBNUC  
EXMOD  
OBFRO  
OBSET  
OBFIN  
POINT  
FREQU  
SCANS  
ACQTM  
PD  
PWI  
IRNUC  
CTEMP  
SLVNT  
EXREF  
BF  
RGAIN

NAO-251-up\_Carbon-1-1.als  
single pulse decoupled gated NOE  
2012-08-01 20:05:21  
13C  
carbon.jpg  
125.77 MHz  
7.87 KHz  
4.21 Hz  
26224  
31446.54 Hz  
512  
0.8336 sec  
2.0000 sec  
2.72 usec  
1H  
23.7 c  
CDCL3  
77.00 ppm  
0.12 Hz  
58

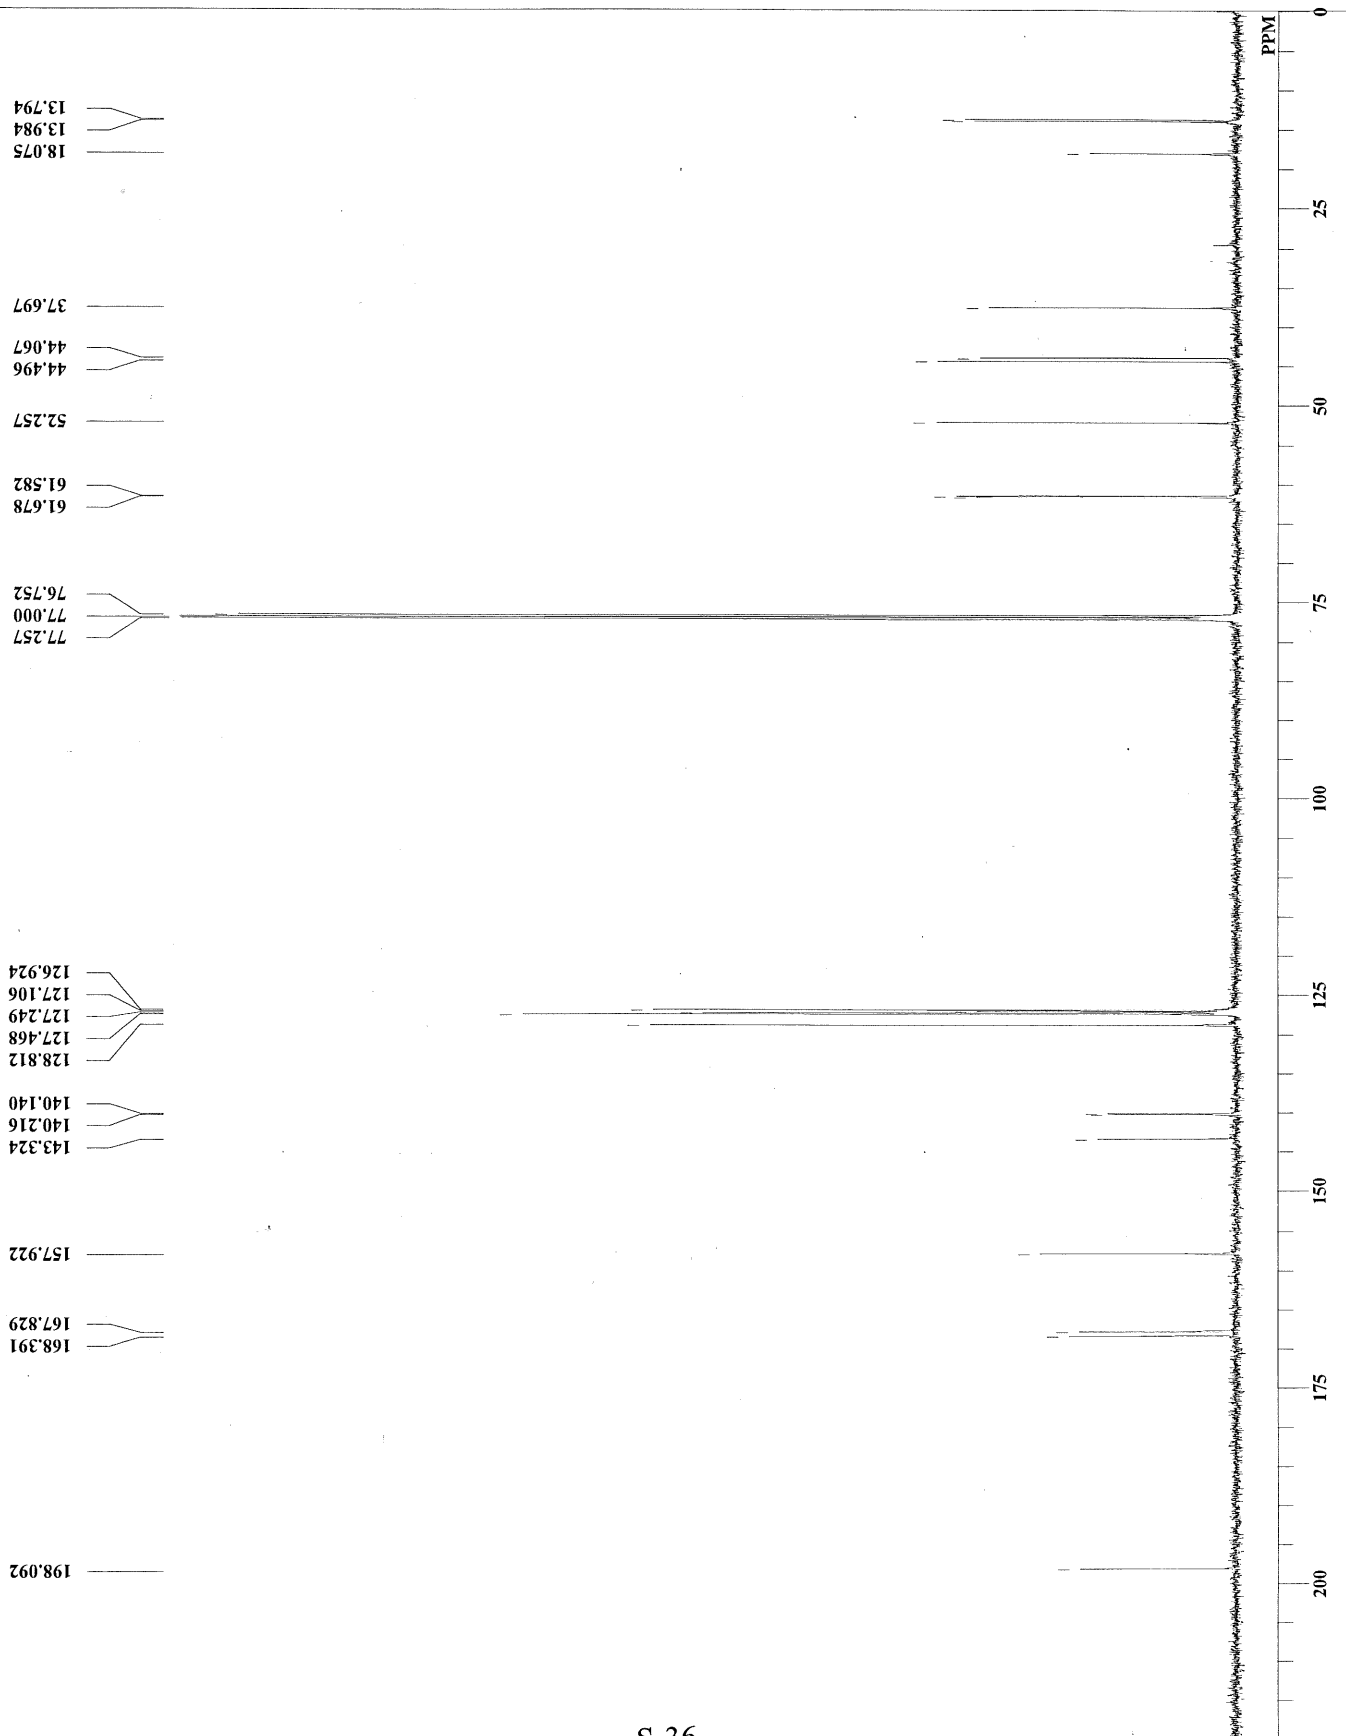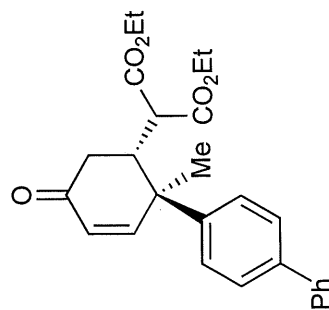

**3e**  
<sup>13</sup>C NMR  
(125 MHz, CDCl<sub>3</sub>)

C:\DOCUME~1\ADMINI~1\WINLOCALS~1\Temp\ffftp1584\NAO-251-down\_proton-4-1.als

DFILE  
COMNT  
DATIM  
OBNUC  
EXMOD  
OBFRO  
OBSET  
OBFIN  
POINT  
FREQU  
SCANS  
ACQTM  
PD  
PWI  
IRNUC  
CTEMP  
SLVNT  
EXREF  
BF  
RGAIN

NAO-251-down\_proton-4-1.als  
single\_pulse  
2012-10-07 18:23:51  
1H  
proton.jpg  
500.16 MHz  
2.41 KHz  
6.01 Hz  
13120  
7507.51 Hz  
8  
1.7459 sec  
5.0000 sec  
4.68 usec  
1H  
20.0 c  
CDCL3  
12.51 ppm  
0.12 Hz  
54

1.063  
1.077  
1.091  
1.186  
1.201  
1.215  
1.711  
2.570  
2.578  
2.605  
2.614  
2.885  
2.908  
2.921  
2.943  
3.131  
3.139  
3.148  
3.162  
3.171  
3.509  
3.518  
3.692  
3.699  
3.707  
3.713  
3.727  
3.742  
3.759  
3.774  
3.781  
3.796  
4.053  
4.060  
4.067  
4.075  
4.089  
4.099  
4.113  
4.126  
4.134  
4.141  
4.148  
4.163  
4.283  
4.296  
4.309  
6.194  
6.213  
6.802  
6.822  
7.347  
7.362  
7.377  
7.389  
7.405  
7.434  
7.449  
7.464  
7.570  
7.586

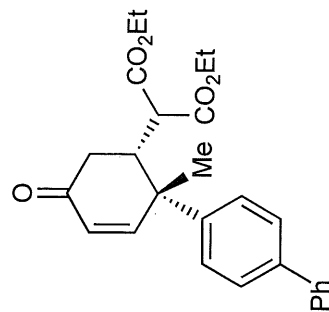

<sup>1</sup>H NMR  
(500 MHz, CDCl<sub>3</sub>)

1.04  
0.89  
0.90  
1.01  
2.03  
2.47  
1.19  
5.83  
5.31  
1.00  
0.90

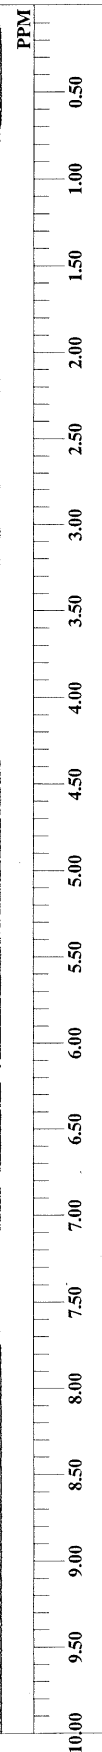

C:\DOCUMENT-1\ADMINI-1\WINLOCALS-1\Temp\ffftp1584\NAO-251-down\_Carbon-4-1.jdf

DFILE  
COMNT  
DATIM  
OBNUC  
EXMOD  
OBFRO  
OBSET  
OBFIN  
POINT  
FREQU  
SCANS  
ACQTM  
PD  
PWI  
IRNUC  
CTEMP  
SLVNT  
EXREF  
BF  
RGAIN

NAO-251-down\_Carbon-4-1.jdf  
single pulse decoupled gated NOE  
2012-10-07 11:24:26  
13C  
carbon.jpg  
125.77 MHz  
7.87 KHz  
4.21 Hz  
32780  
39308.18 Hz  
2048  
0.8336 sec  
2.0000 sec  
2.72 usec  
IH  
20.5 c  
CDCL3  
77.00 ppm  
0.12 Hz  
60

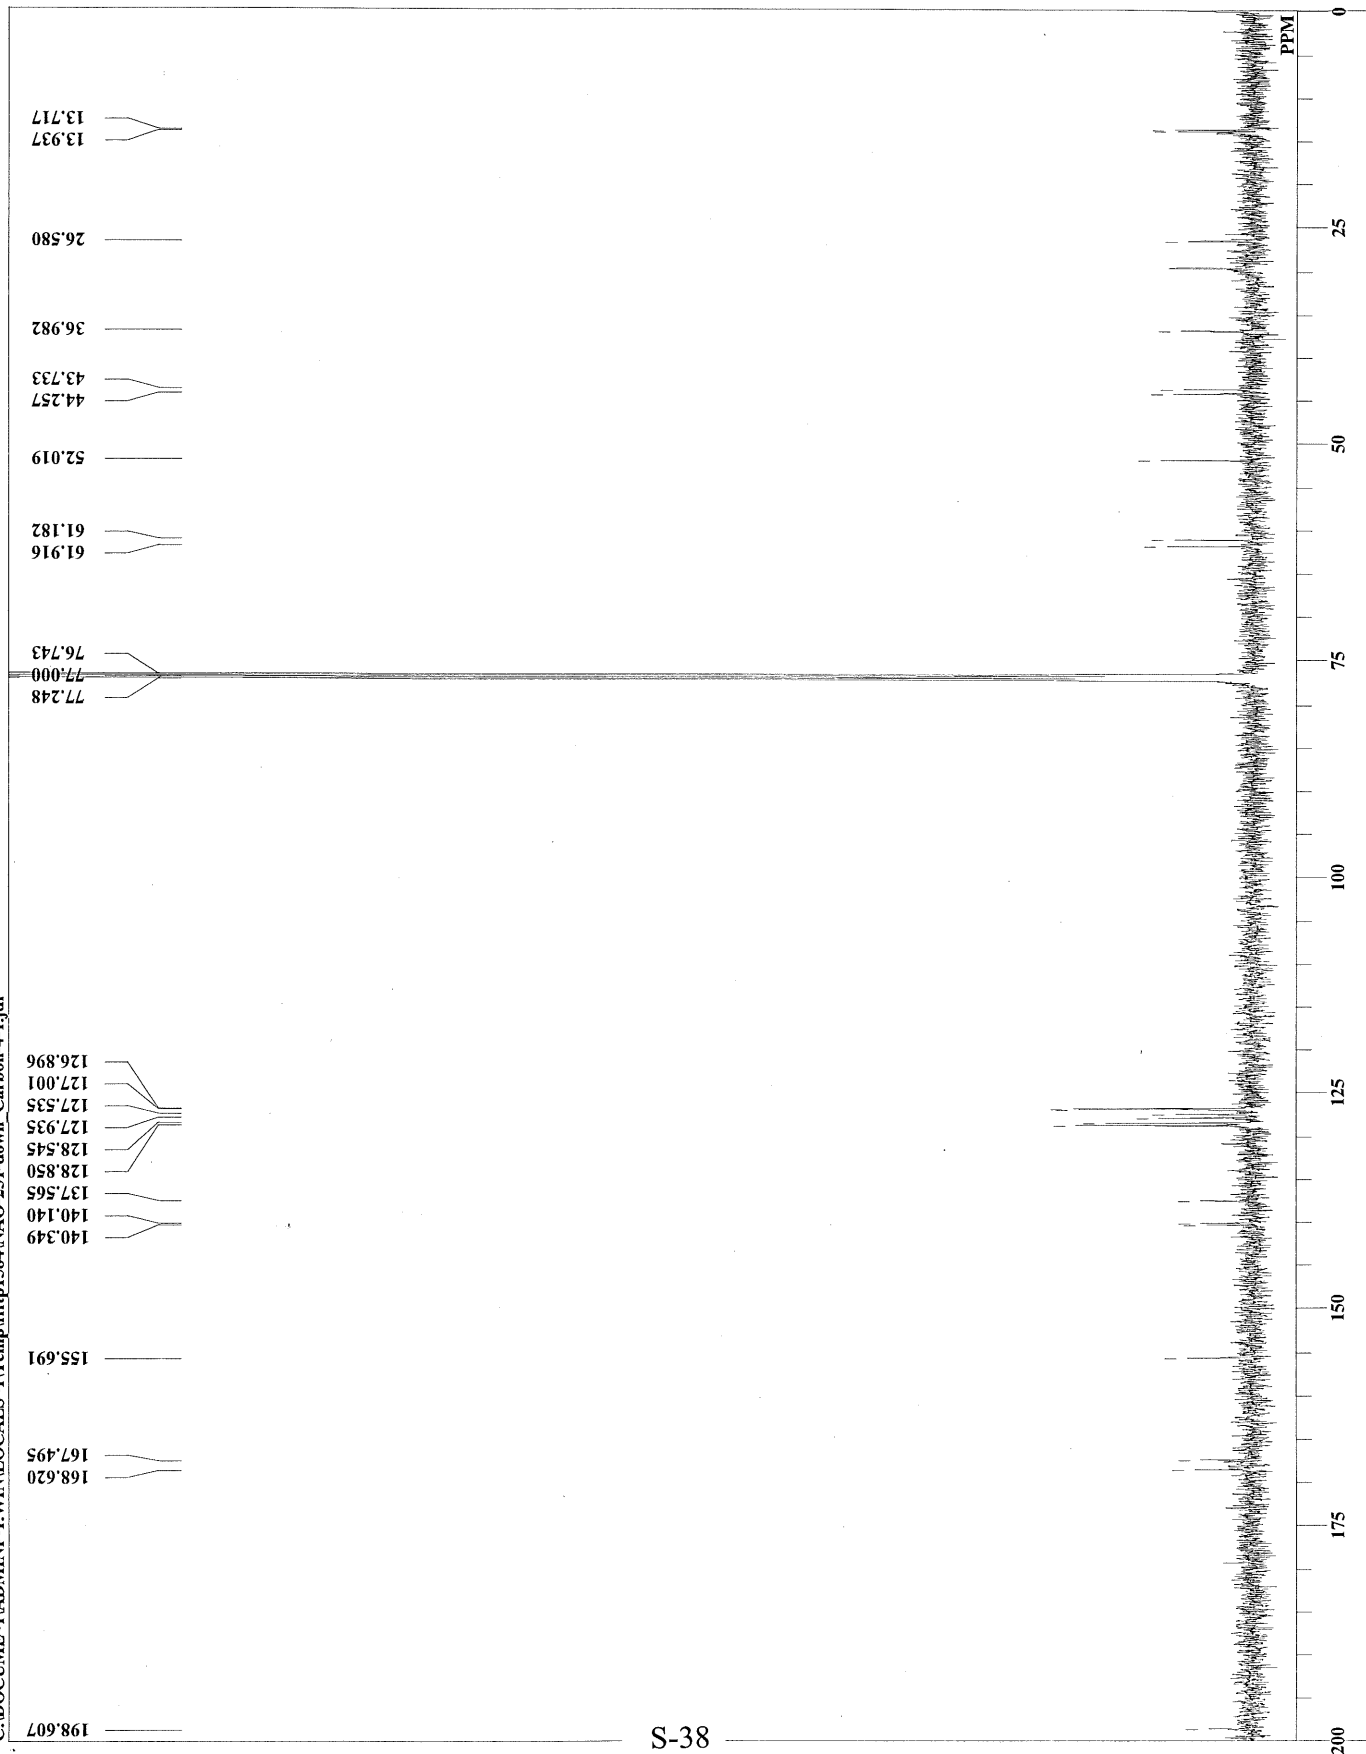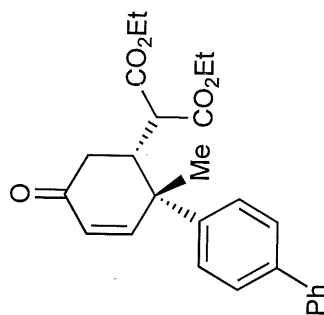

4e  
<sup>13</sup>C NMR  
(125 MHz, CDCl<sub>3</sub>)

C:\DOCUMENT-1\ADMINI-1\WINLOCALS-1\Temp\fftp158\NAO-251-hypro\_proton-2-1.als

DFILE  
 COMNT  
 DATIM 2012-10-24 21:03:04  
 OBNUC 1H  
 EXMOD proton\_jxp  
 OBFRQ 500.16 MHz  
 OBSET 2.41 KHz  
 OBFIN 6.01 Hz  
 POINT 13120  
 FREQU 7507.51 Hz  
 SCANS 8  
 ACQTM 1.7459 sec  
 PD 5.0000 sec  
 PW1 4.68 usec  
 IRNUC 1H  
 CTMP 18.5 c  
 SLVNT CDCL3  
 EXREF 12.51 ppm  
 BF 0.12 Hz  
 RGAIN 48

NAO-251-hypro\_proton-2-1.als

single\_pulse

1H

proton\_jxp

500.16 MHz

2.41 KHz

6.01 Hz

13120

7507.51 Hz

8

1.7459 sec

5.0000 sec

4.68 usec

1H

18.5 c

CDCL3

12.51 ppm

0.12 Hz

48

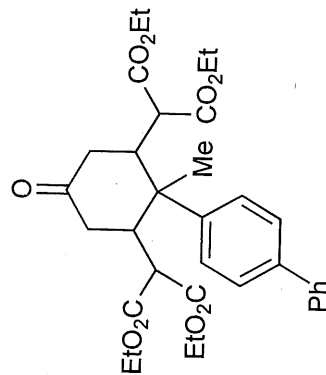

6

<sup>1</sup>H NMR(500 MHz, CDCl<sub>3</sub>)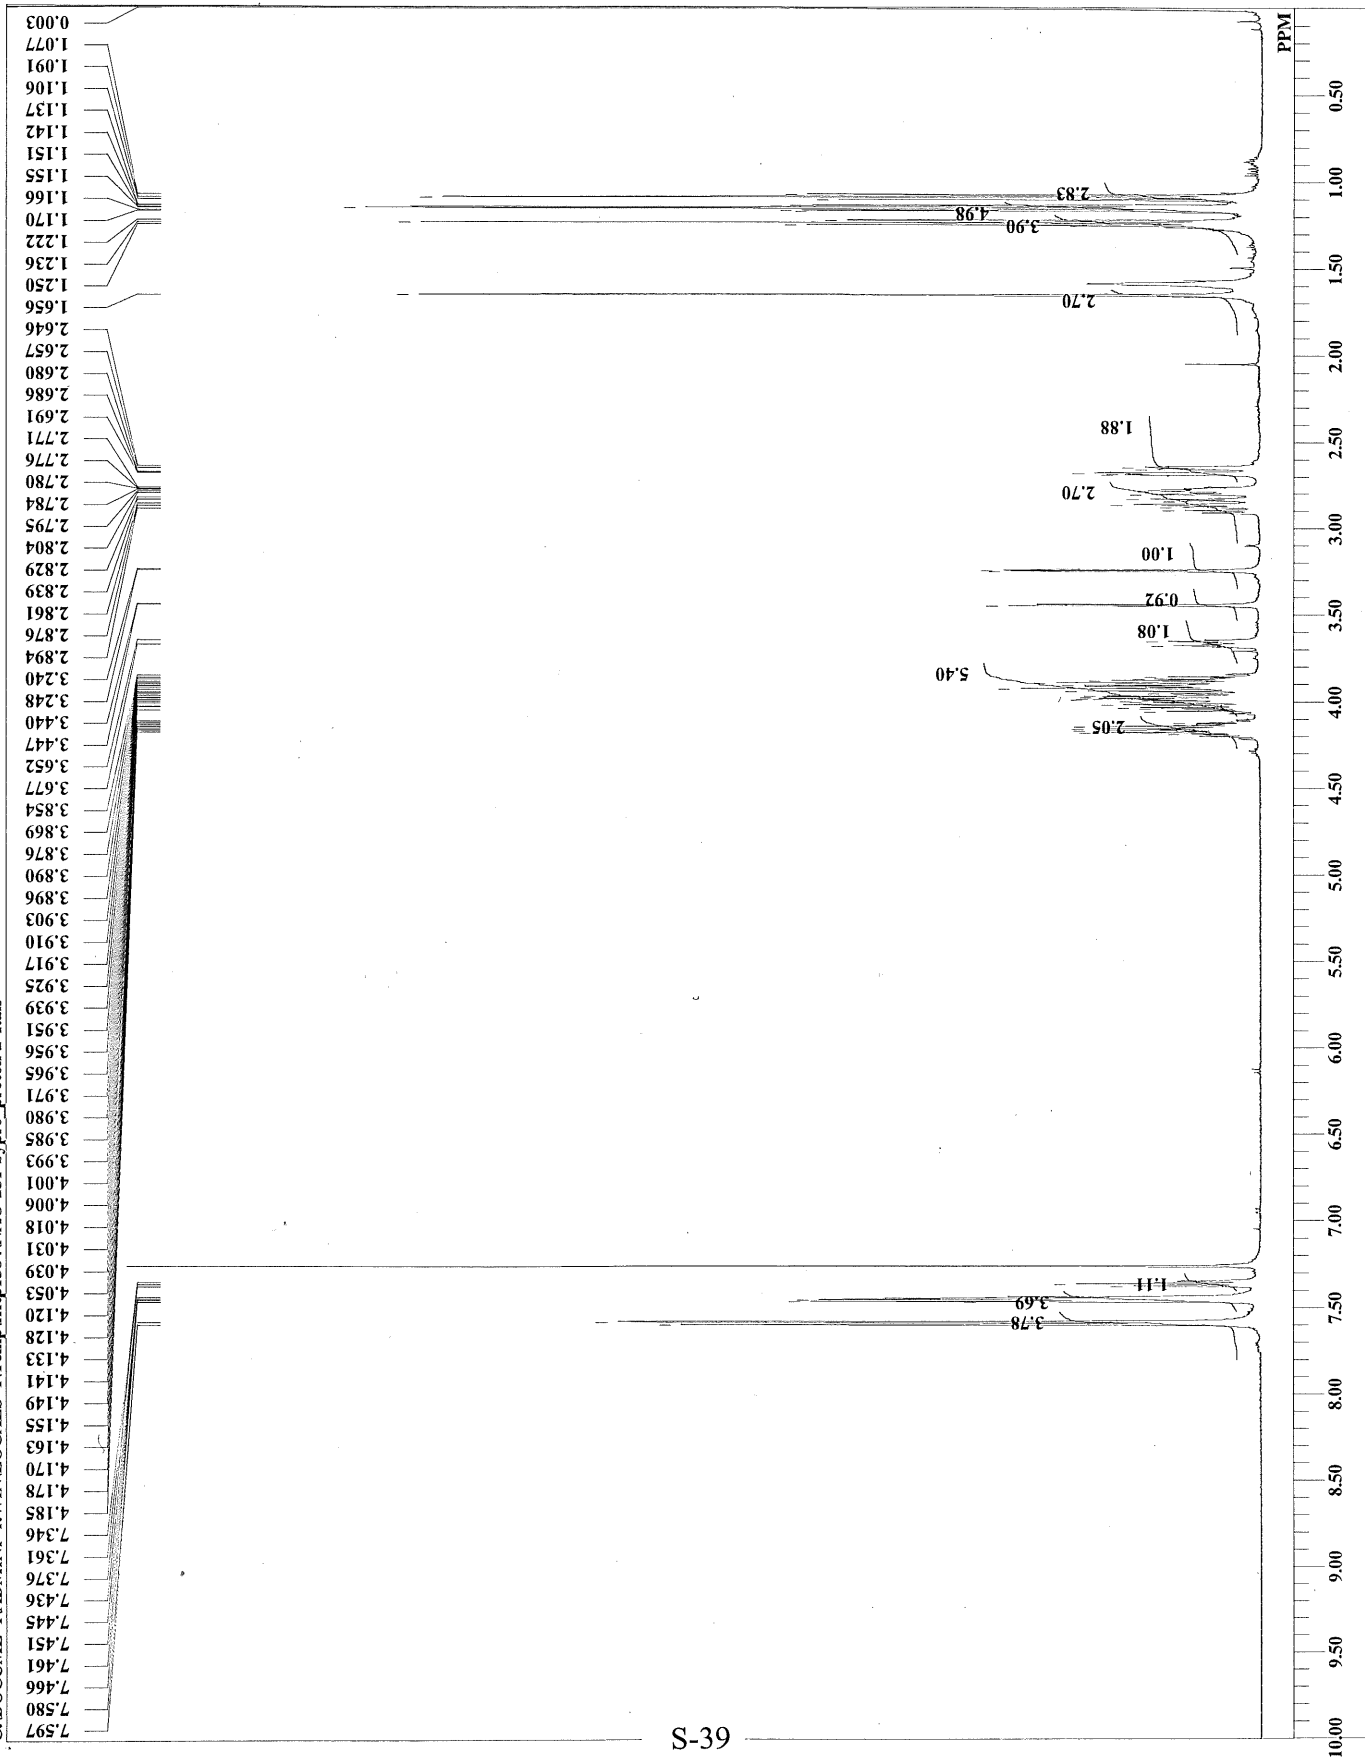

C:\DOCUME~1\ADMINI~1\WINLOCALS~1\Temp\ffftp1584\NAO-251-bypro\_Carbon-2-1.als

DFILE COMNT  
 DATIM  
 OBNUC  
 EXMOD  
 OBFRO  
 OBSET  
 OBFIN  
 POINT  
 FREQU  
 SCANS  
 ACQTM  
 PD  
 PW1  
 IRNUC  
 CTMP  
 SLVNT  
 EXREF  
 BF  
 RGAIN

NAO-251-bypro\_Carbon-2-1.als  
 single pulse decoupled gated NOE  
 2012-10-24 21:12:02  
 13C  
 carbon.jp  
 125.77 MHz  
 7.87 KHz  
 4.21 Hz  
 26224  
 31446.54 Hz  
 1024  
 0.8336 sec  
 2.0000 sec  
 2.72 usec  
 1H  
 18.9 c  
 CDCL3  
 77.00 ppm  
 0.12 Hz  
 60

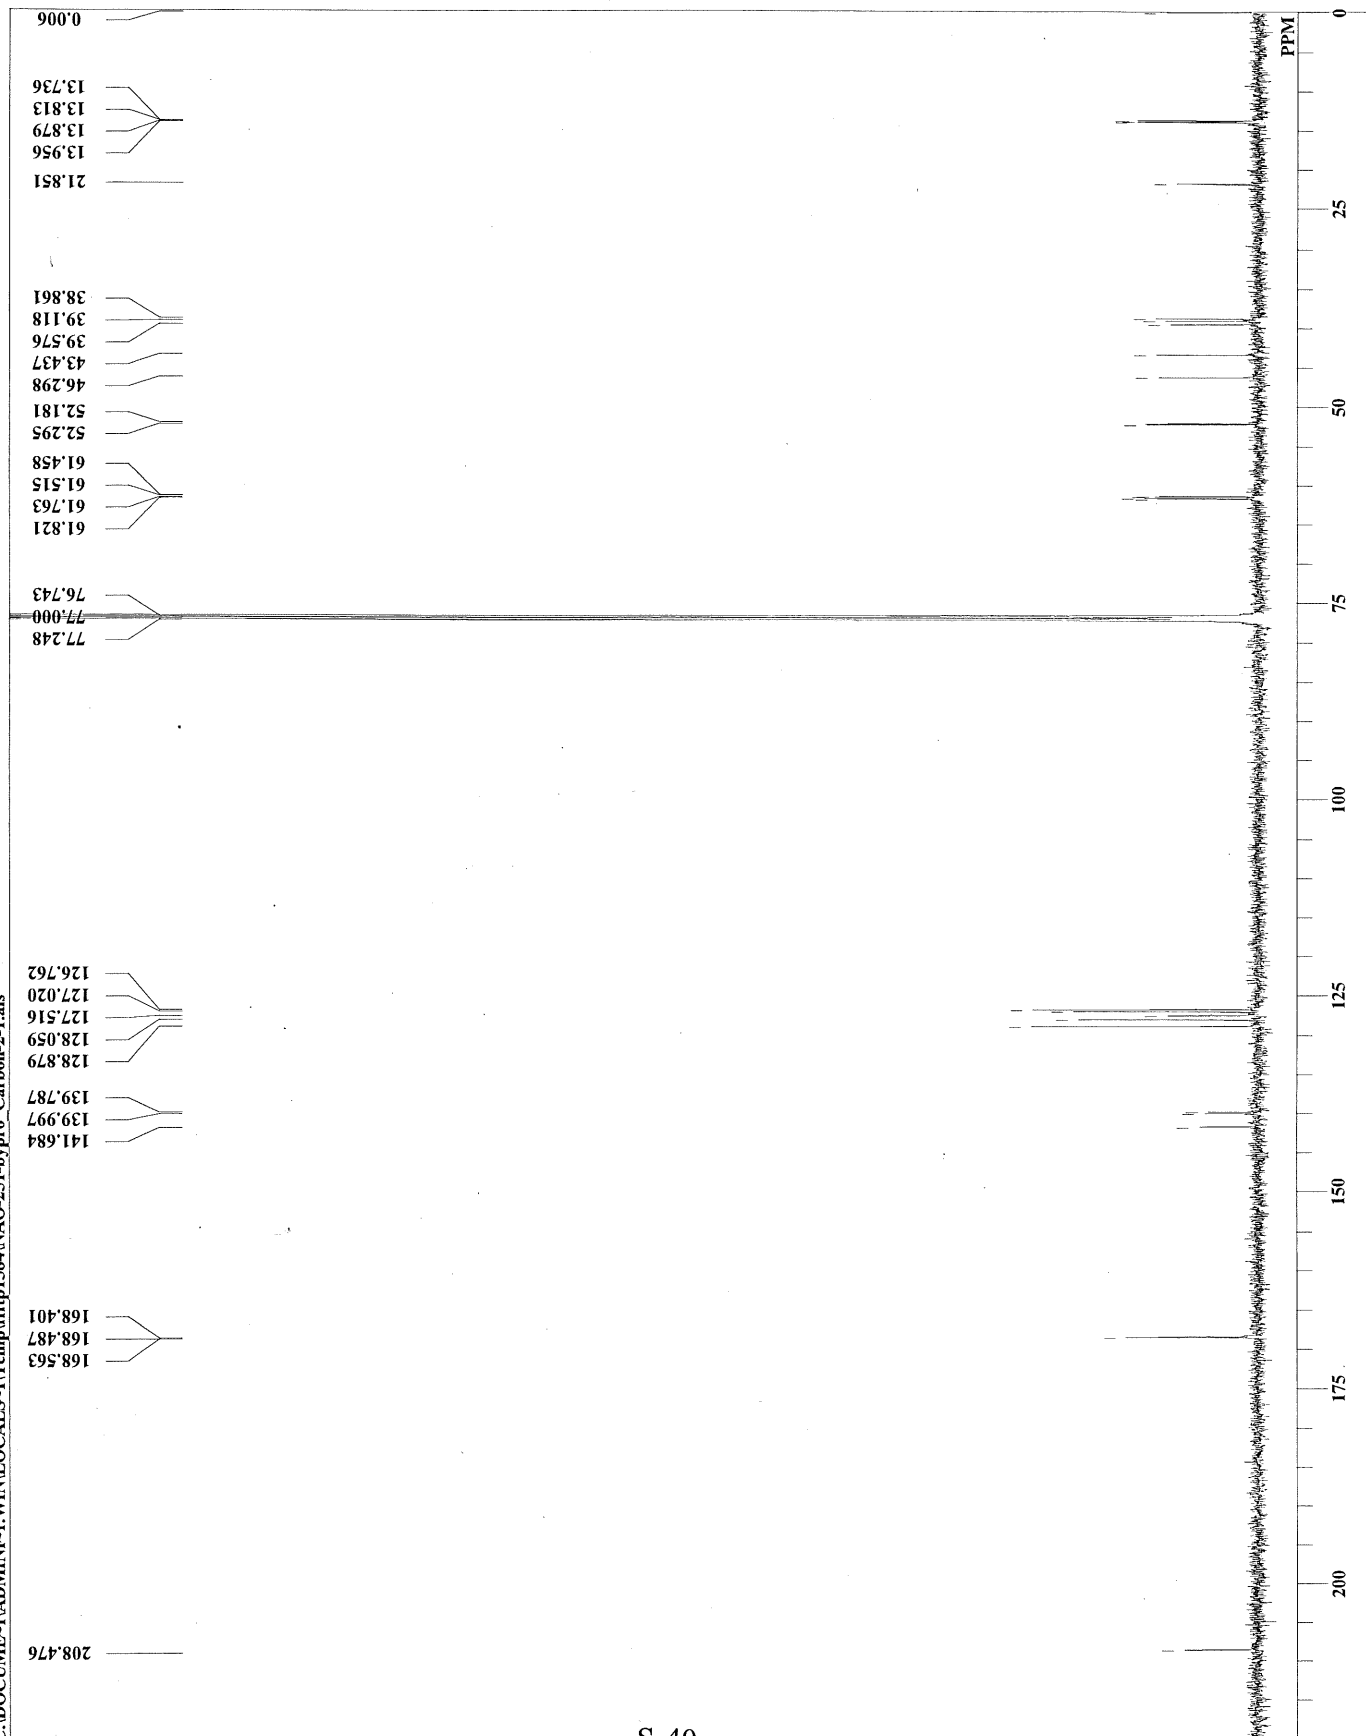

DFILE  
COMNT  
DATIM  
OBNUC  
EXMOD  
OBFRO  
OBSER  
OBFIN  
POINT  
FREQU  
SCANS  
ACQIM  
PD  
PWI  
IRNUC  
CTEMP  
SLVNT  
EXREF  
BF  
RGAIN

NAO-238-up\_proton-1-1.als  
single\_pulse  
2012-07-24 23:30:27  
1H  
proton.jpg  
500.16 MHz  
2.41 KHz  
6.01 Hz  
13120  
7507.51 Hz  
8  
1.7459 sec  
5.0000 sec  
4.68 usec  
1H  
22.5 c  
CDCL3  
7.26 ppm  
0.12 Hz  
40

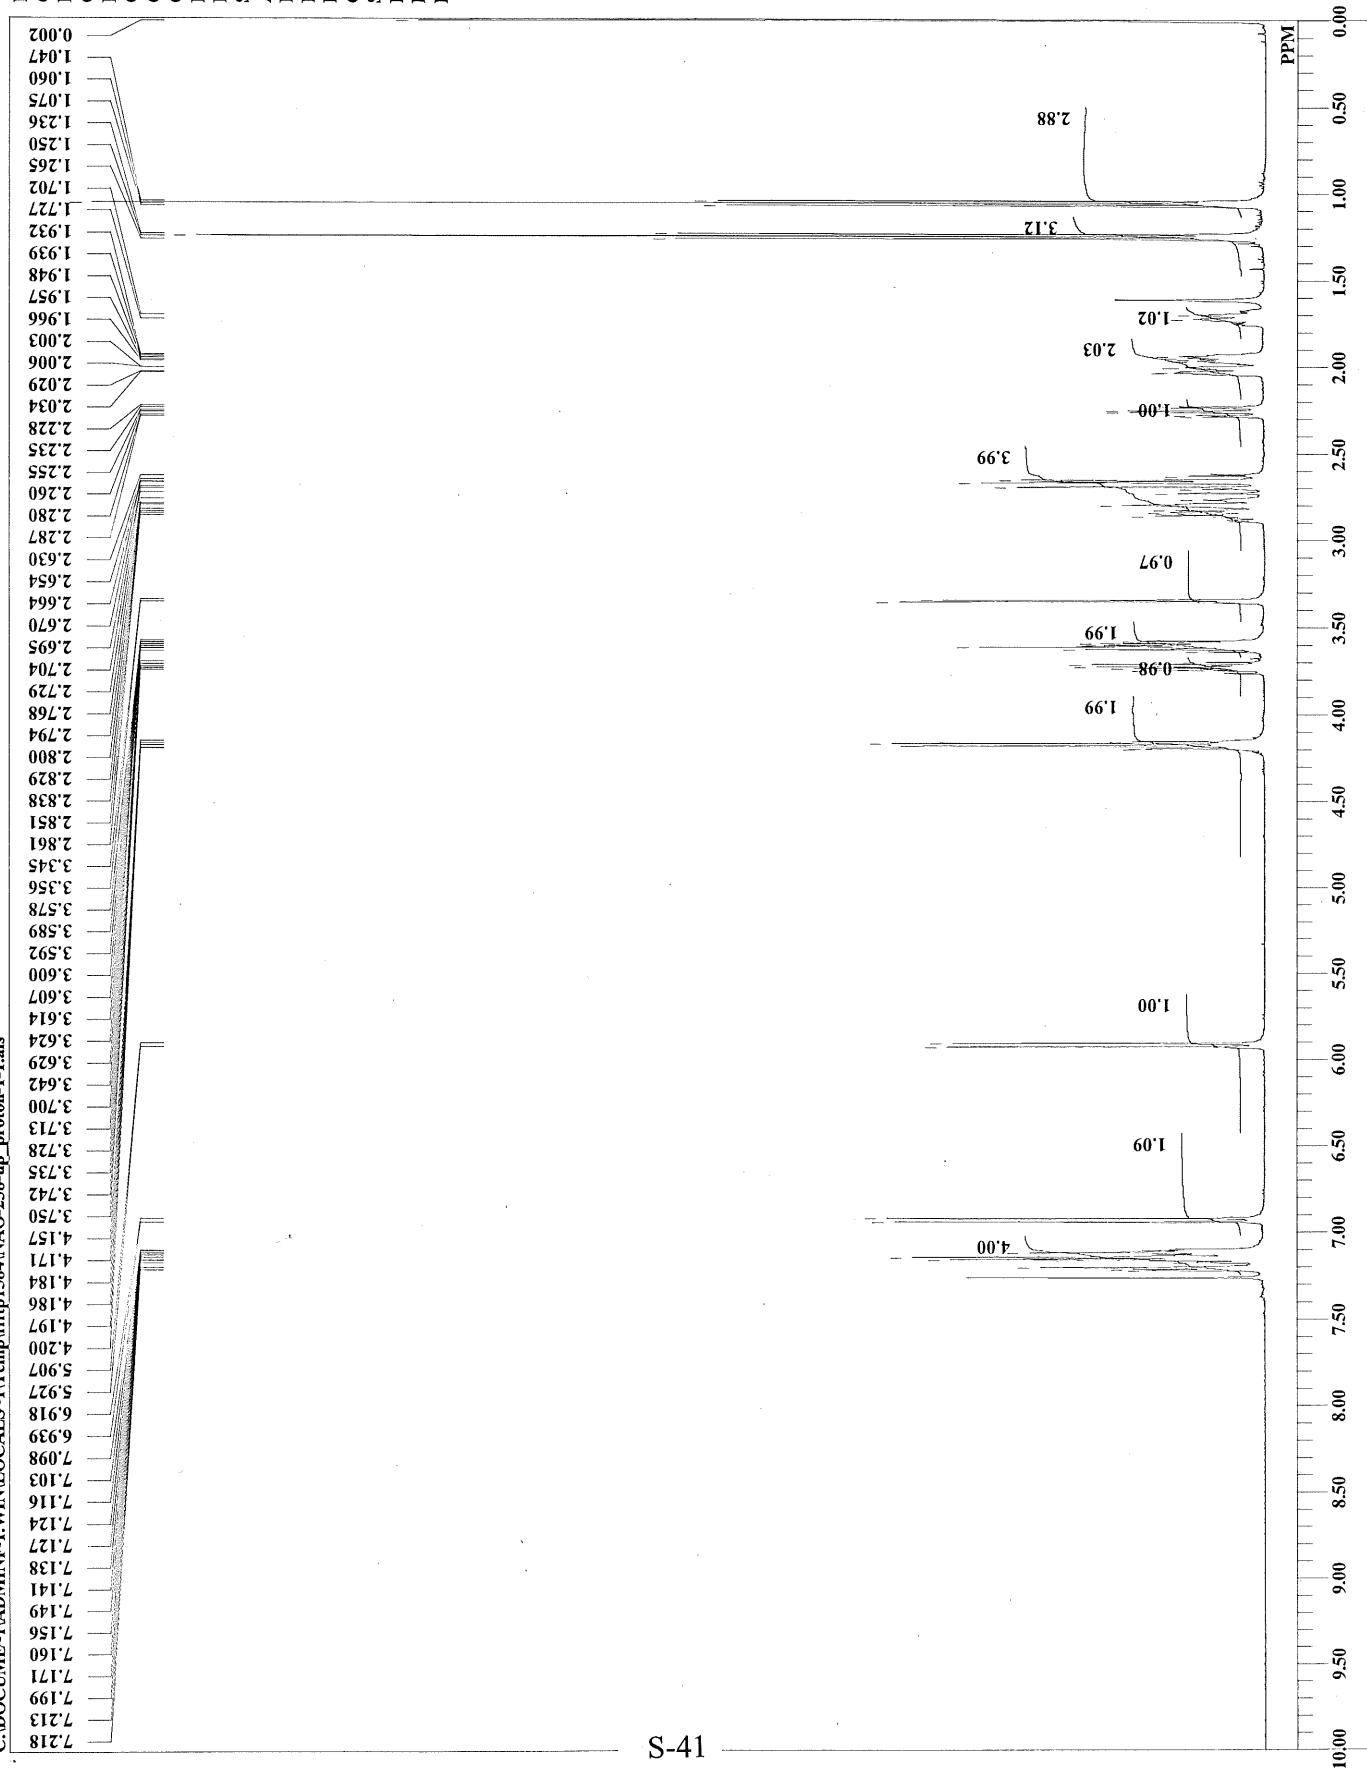

C:\DOCUME~1\ADMINI~1\WINLOCALS~1\Temp\ffftp1584\NAO-238-up\_Carbon-1-1.jdf

DFILE COMNT  
 DATIM  
 OBNUC  
 EXMOD  
 OBFREQ  
 OBSET  
 OBFIN  
 POINT  
 FREQU  
 SCANS  
 ACQTM  
 PD  
 PW1  
 IRNUC  
 CTEMP  
 SLVNT  
 EXREF  
 BF  
 RGAIN

NAO-238-up\_Carbon-1-1.jdf  
 single pulse decoupled gated NOE  
 2012-07-24 23:37:58  
 13C  
 carbon.jxp  
 125.77 MHz  
 7.87 KHz  
 4.21 Hz  
 32780  
 39308.18 Hz  
 512  
 0.8336 sec  
 2.0000 sec  
 2.72 usec  
 1H  
 23.1 c  
 CDCL3  
 77.00 ppm  
 0.12 Hz  
 56

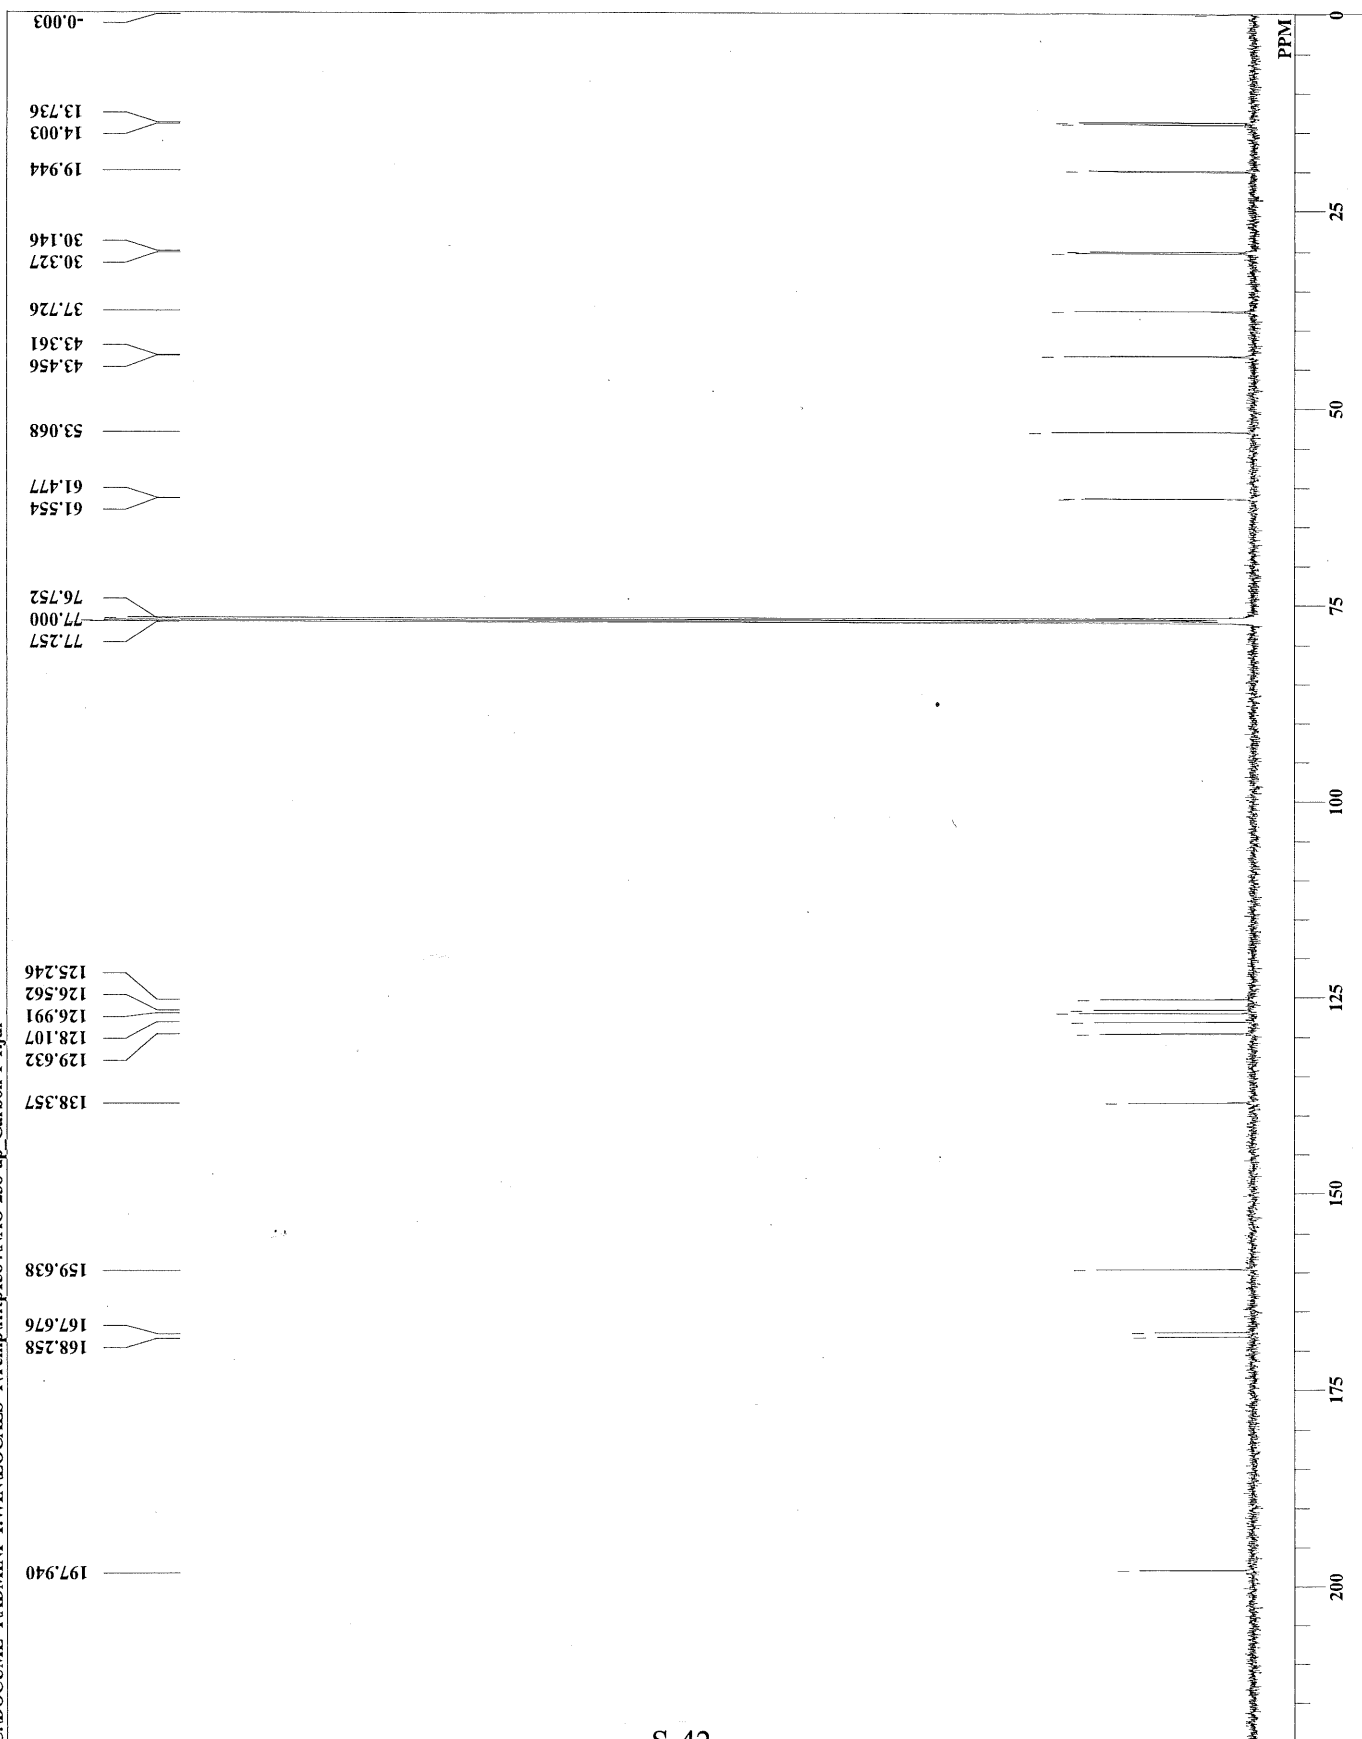

DFILE  
COMNT  
DATIM  
OBNUC  
EXMOD  
OBFRO  
OBFET  
OBFIN  
POINT  
FREQU  
SCANS  
ACQTM  
PD  
PWI  
IRNUC  
CTEMP  
SLVNT  
EXREF  
BF  
RGAIN

NAO-238-down\_proton-2-1.jdf  
single\_pulse  
2012-10-16 23:08:26  
1H  
proton\_xp  
500.16 MHz  
2.41 KHz  
6.01 Hz  
16400  
9384.38 Hz  
8  
1.7459 sec  
5.0000 sec  
4.68 usec  
1H  
20.1 c  
CDCL3  
12.51 ppm  
0.12 Hz  
50

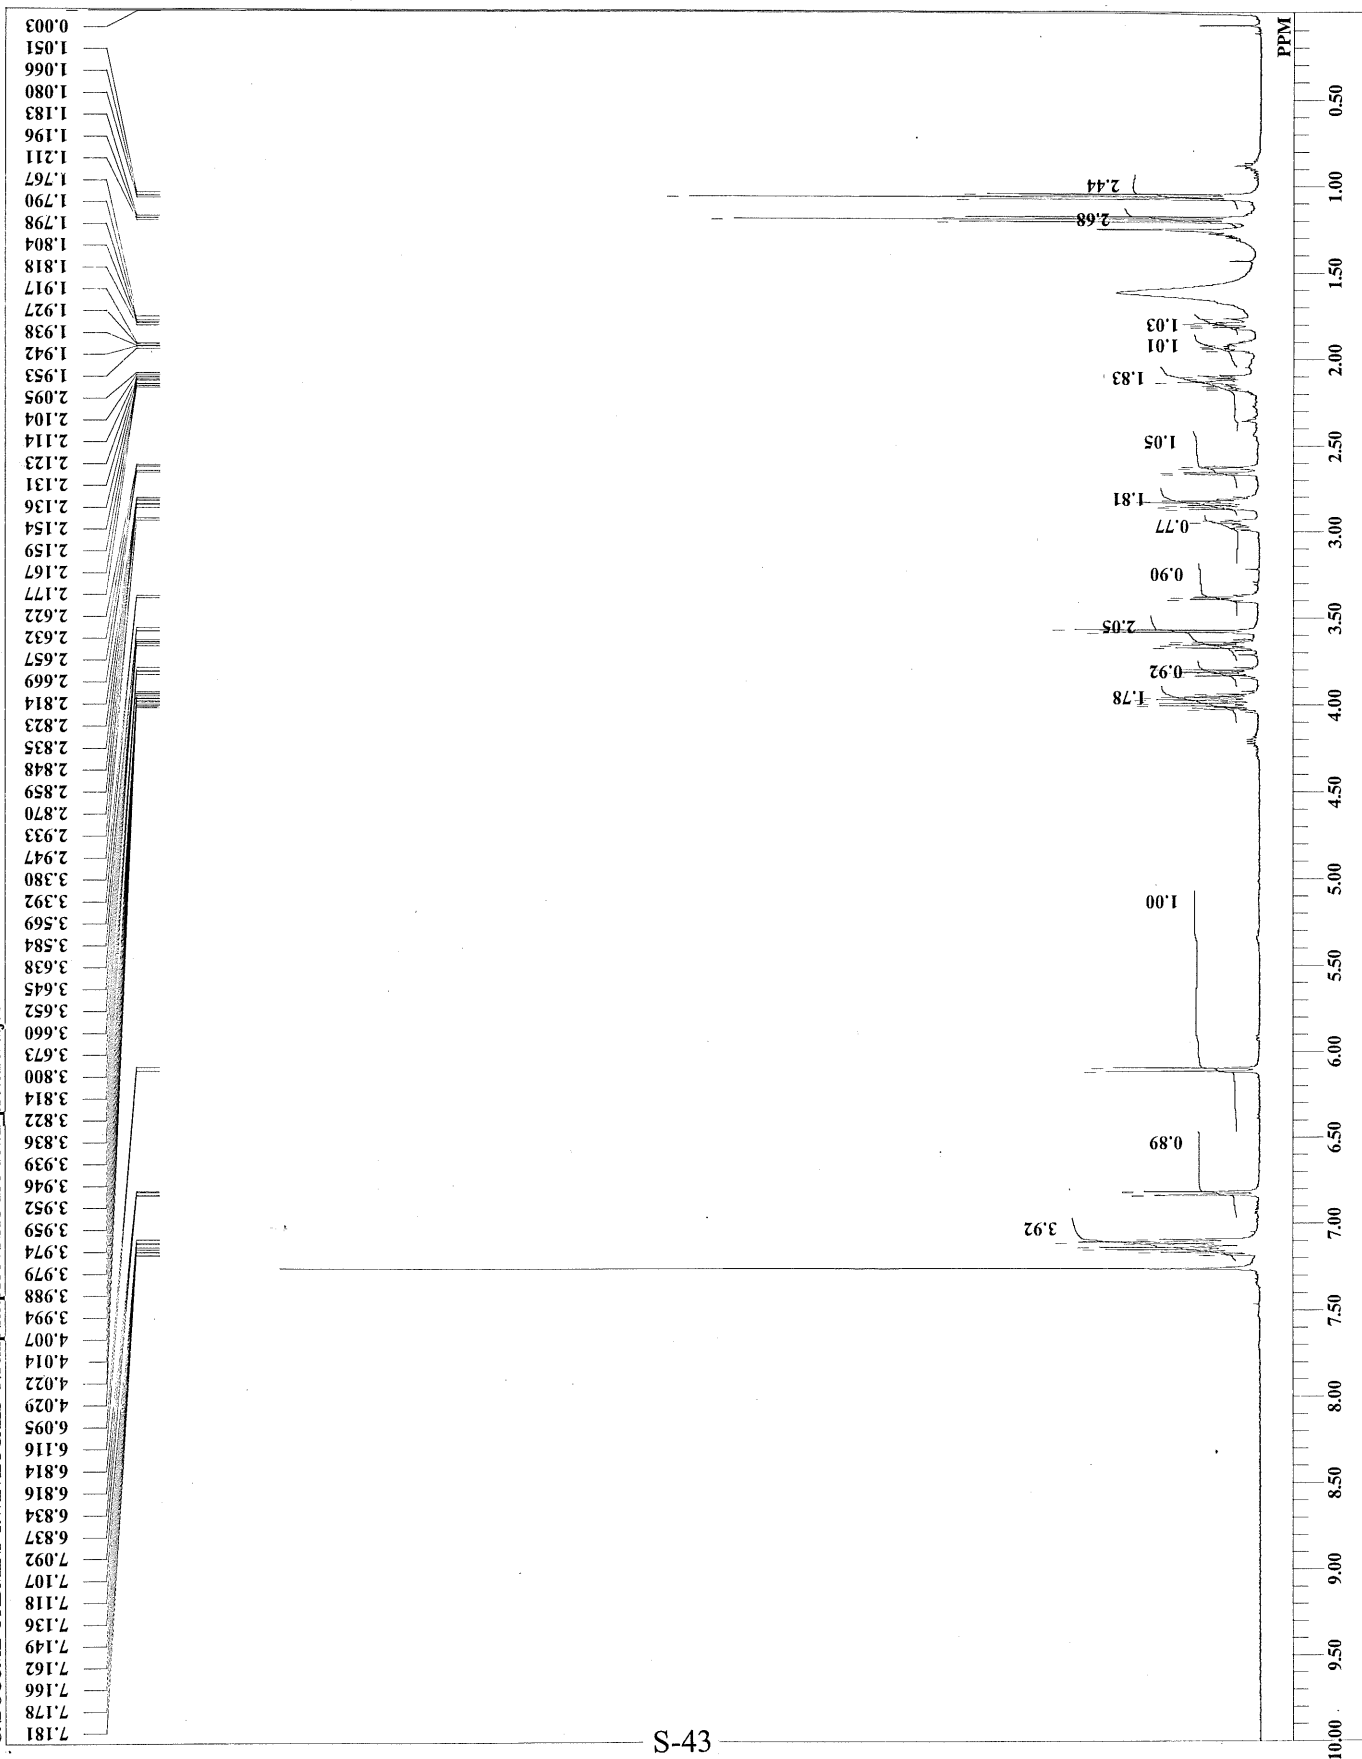

C:\DOCUMENT-1\ADMINI-1\WINLOCALS-1\Temp\ffftp1584\NAO-238-down\_Carbon-1-1.als

DFILE  
COMNT  
DATIM  
OBNUC  
EXMOD  
OBFRO  
OBSET  
OBFIN  
POINT  
FREQU  
SCANS  
ACQTM  
PD  
PWI  
IRNUC  
CTEMP  
SLVNT  
EXREF  
BF  
RGAIN

NAO-238-down\_Carbon-1-1.als  
single pulse decoupled gated NOE  
2012-10-07 17:22:46  
13C  
carbon.jpg  
125.77 MHz  
7.87 KHz  
4.21 Hz  
26224  
31446.54 Hz  
1024  
0.8336 sec  
2.0000 sec  
2.72 usec  
IH  
20.3 c  
CDCL3  
77.00 ppm  
0.12 Hz  
60

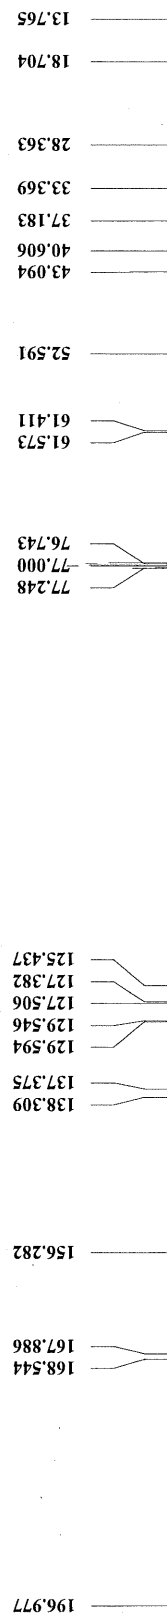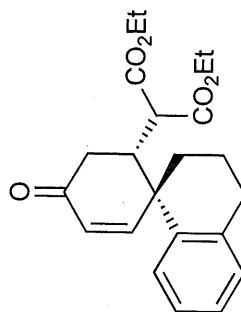

**4f**  
<sup>13</sup>C NMR  
(125 MHz, CDCl<sub>3</sub>)

C:\DOCUME~1\ADMINI~1\WINLOCALS~1\Temp\ffftp1584\NAO-232\_proton-1-1.als

DFILE NAO-232\_proton-1-1.als  
 COMNT single\_pulse  
 DATIM 2012-08-29 14:40:50  
 OBNUC 1H  
 EXMOD proton\_jxp  
 OBFRQ 500.16 MHz  
 OBSET 2.41 KHz  
 OBFIN 6.01 Hz  
 POINT 13120  
 FREQU 7507.51 Hz  
 SCANS 8  
 ACQTM 1.7459 sec  
 PD 5.0000 sec  
 PW1 4.68 usec  
 IRNUC 1H  
 CTEMP 21.7 c  
 SLVNT CDCL3  
 EXREF 7.26 ppm  
 BF 0.12 Hz  
 RGAIN 30

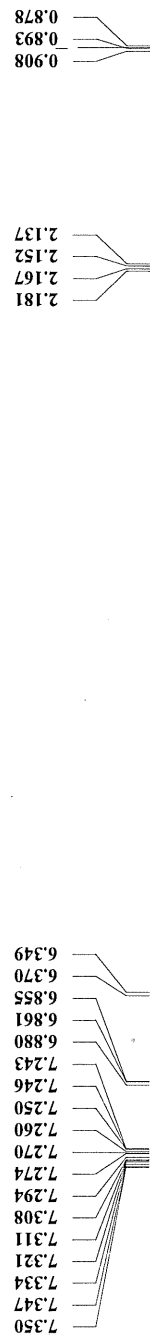

5.35

2.07

2.00

2.20

3.17

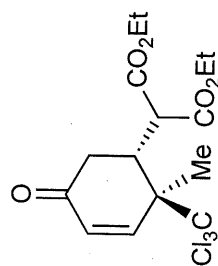

**3g**  
<sup>1</sup>H NMR  
 (500 MHz, CDCl<sub>3</sub>)

C:\DOCUME~1\ADMINI~1\WINLOCALS~1\Temp\ffftp1584\NAO-232 Carbon-1-1.als

DFILE  
 COMNT  
 DATIM  
 OBNUC  
 EXMOD  
 OBFRQ  
 OBSET  
 OBFTN  
 POINT  
 FREQU  
 SCANS  
 ACQIM  
 PD  
 PWI  
 IRNUC  
 CTEMP  
 SLVNT  
 EXREF  
 BF  
 RGAIN

NAO-232 Carbon-1-1.als  
 single pulse decoupled gated NOE  
 2012-08-29 14:48:18  
 13C  
 carbon.jpg  
 125.77 MHz  
 7.87 KHz  
 4.21 Hz  
 26224  
 31446.54 Hz  
 512  
 0.8336 sec  
 2.0000 sec  
 2.72 usec  
 1H  
 22.2 c  
 CDCL3  
 77.00 ppm  
 0.12 Hz  
 60

8.893

30.079

49.435

 76.743  
 77.257  
 77.000

 126.495  
 127.411  
 128.707  
 128.879

139.930

154.099

186.126

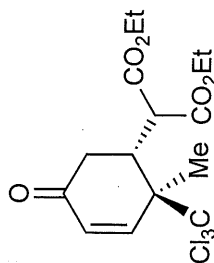

**3g**  
<sup>13</sup>C NMR  
 (125 MHz, CDCl<sub>3</sub>)

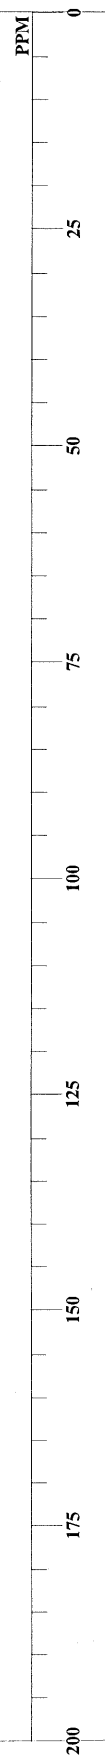

**DFILE**  
**COMNT**  
**DATIM**  
**OBNUC**  
**EXMOD**  
**OBFRQ**  
**OBSET**  
**OBFIN**  
**POINT**  
**FREQU**  
**SCANS**  
**ACQTM**  
**PD**  
**PWI**  
**IRNUC**  
**CTEMP**  
**SLVNT**  
**EXREF**  
**BF**  
**RGAIN**

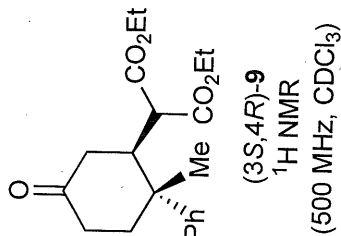

C:\DOCUMENT-1\ADMINI-1\WINLOCALS-1\Temp\ffftp1840\NAR-26-up\_Carbon-1-1.jdf

DFLE NAR-26-up\_Carbon-1-1.jdf  
 COMNT single pulse decoupled gated NOE  
 DATIM 2012-08-25 09:29:17  
 OENUC 13C  
 EXMOD carbon.jxp  
 OBFRQ 125.77 MHz  
 OBSST 7.87 KHz  
 OBFIN 4.21 Hz  
 POINT 32780  
 FREQU 39308.18 Hz  
 SCANS 256  
 ACQTM 0.8336 sec  
 PD 2.0000 sec  
 PW1 2.72 usec  
 IRNUC 1H  
 CTMP 22.5 c  
 SLVNT CDCL3  
 EXREF 77.00 ppm  
 BF 0.12 Hz  
 RGAIN 60

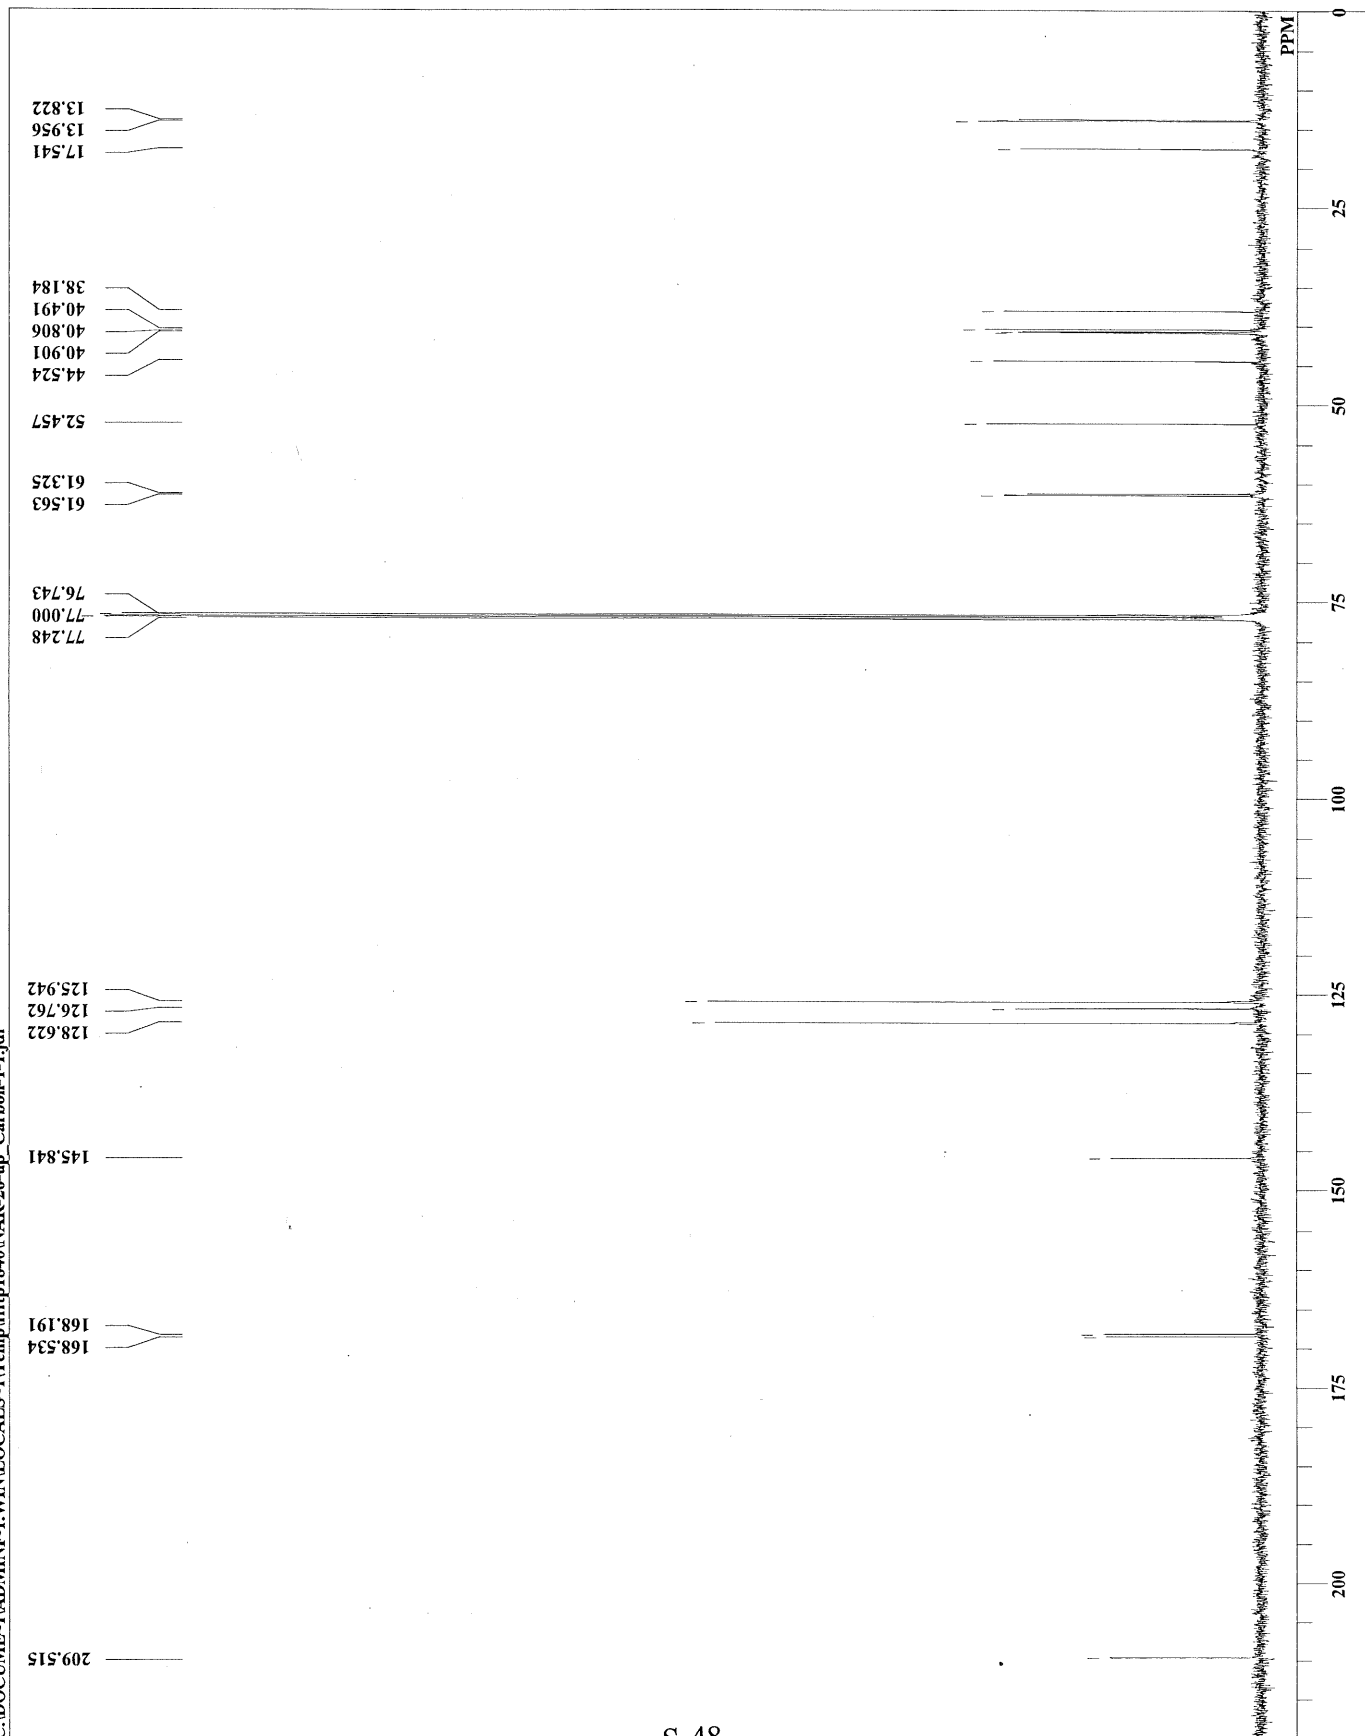

C:\DOCUME~1\ADMINI~1\WINLOCALS~1\Temp\ffftp1584\NAO-270-up\_proton-2-1.als

DFILE  
COMNT  
DATIM  
OBNUC  
EXMOD  
OBFRQ  
OBSET  
OBFIN  
POINT  
FREQU  
SCANS  
ACQTM  
PD  
PW1  
IRNUC  
CTEMP  
SLVNT  
EXREF  
BF  
RGAIN

NAO-270-up\_proton-2-1.als  
single\_pulse  
2012-07-10 14:56:26  
1H  
proton.jpg  
500.16 MHz  
2.41 KHz  
6.01 Hz  
13120  
7507.51 Hz  
8  
1.7459 sec  
5.0000 sec  
4.68 usec  
1H  
22.9 c  
CDCL3  
7.26 ppm  
0.12 Hz  
48

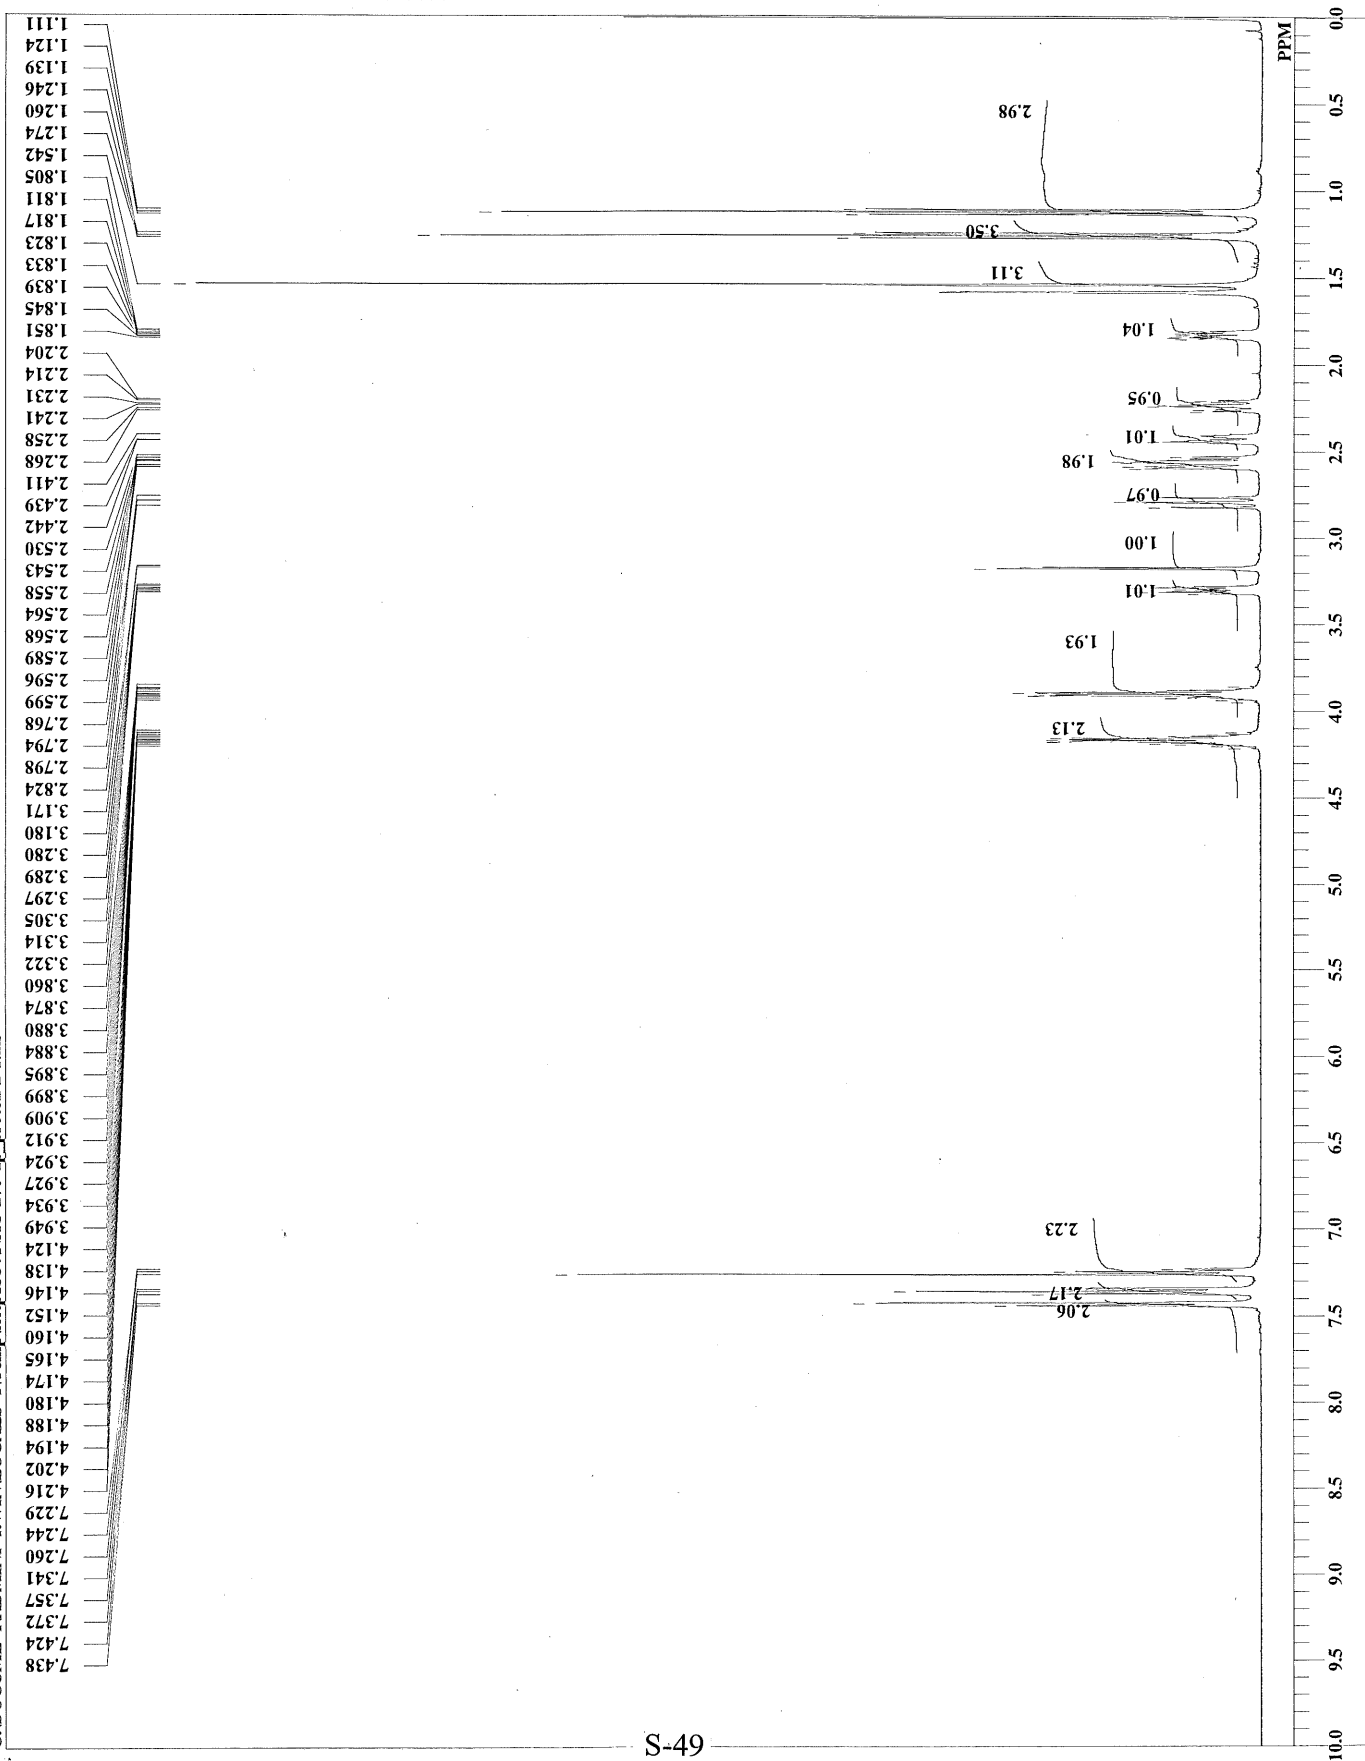

C:\DOCUME~1\ADMINI~1\WINLOCALS~1\Temp\ffftp1584\NAO-254\_Carbon-1-1.jdf

DFILE  
 COMNT  
 DATIM  
 OBNUC  
 EXMOD  
 OBFRO  
 OBSET  
 OBFIN  
 POINT  
 FREQU  
 SCANS  
 ACQTM  
 PD  
 PW1  
 IRNUC  
 CTEMP  
 SLVNT  
 EXREF  
 BF  
 RGAIN

NAO-254\_Carbon-1-1.jdf  
 single pulse decoupled gated NOE  
 2012-06-02 18:21:03  
 13C  
 carbon.jxp  
 125.77 MHz  
 7.87 KHz  
 4.21 Hz  
 32780  
 39308.18 Hz  
 512  
 0.8336 sec  
 2.0000 sec  
 2.72 usec  
 1H  
 19.2 c  
 CDCL3  
 77.00 ppm  
 0.12 Hz  
 58

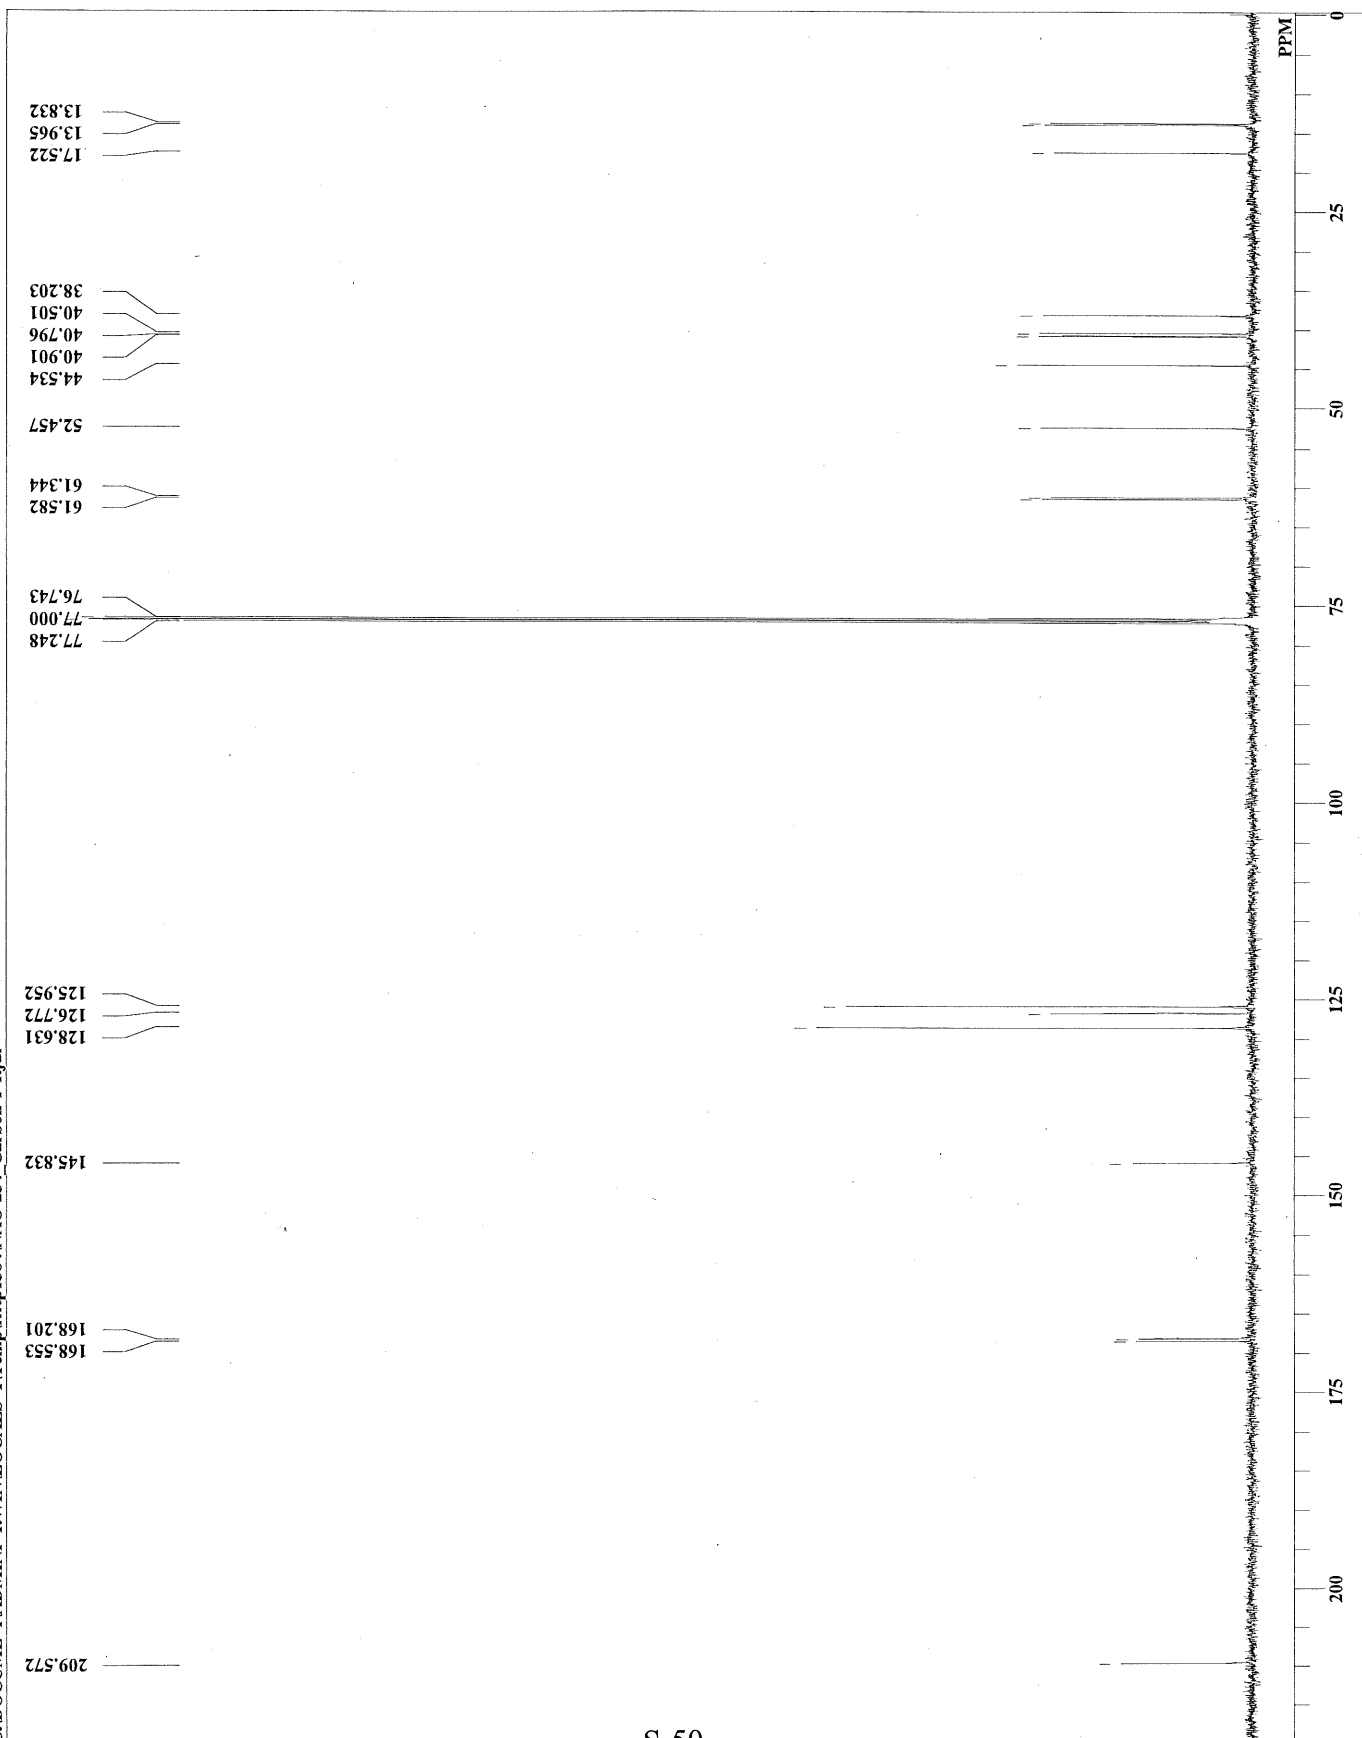

C:\DOCUME~1\ADMINI~1\WINLOCALS~1\Temp\ffftp1988\NAR-25-down\_proton-1-1.als

DFILE COMNT  
DATIM 2012-08-24 18:21:20  
OBNUC 1H  
EXMOD proton\_jxp  
OBFREQ 500.16 MHz  
OBSET 2.41 KHz  
OBFIN 6.01 Hz  
POINT 13120  
FREQU 7507.51 Hz  
SCANS 8  
ACQTM 1.7459 sec  
PD 5.0000 sec  
PW1 4.68 usec  
IRNUC 1H  
CTEMP 23.1 c  
SLVNT CDCL3  
EXREF 7.26 ppm  
BF 0.12 Hz  
RGAIN 36

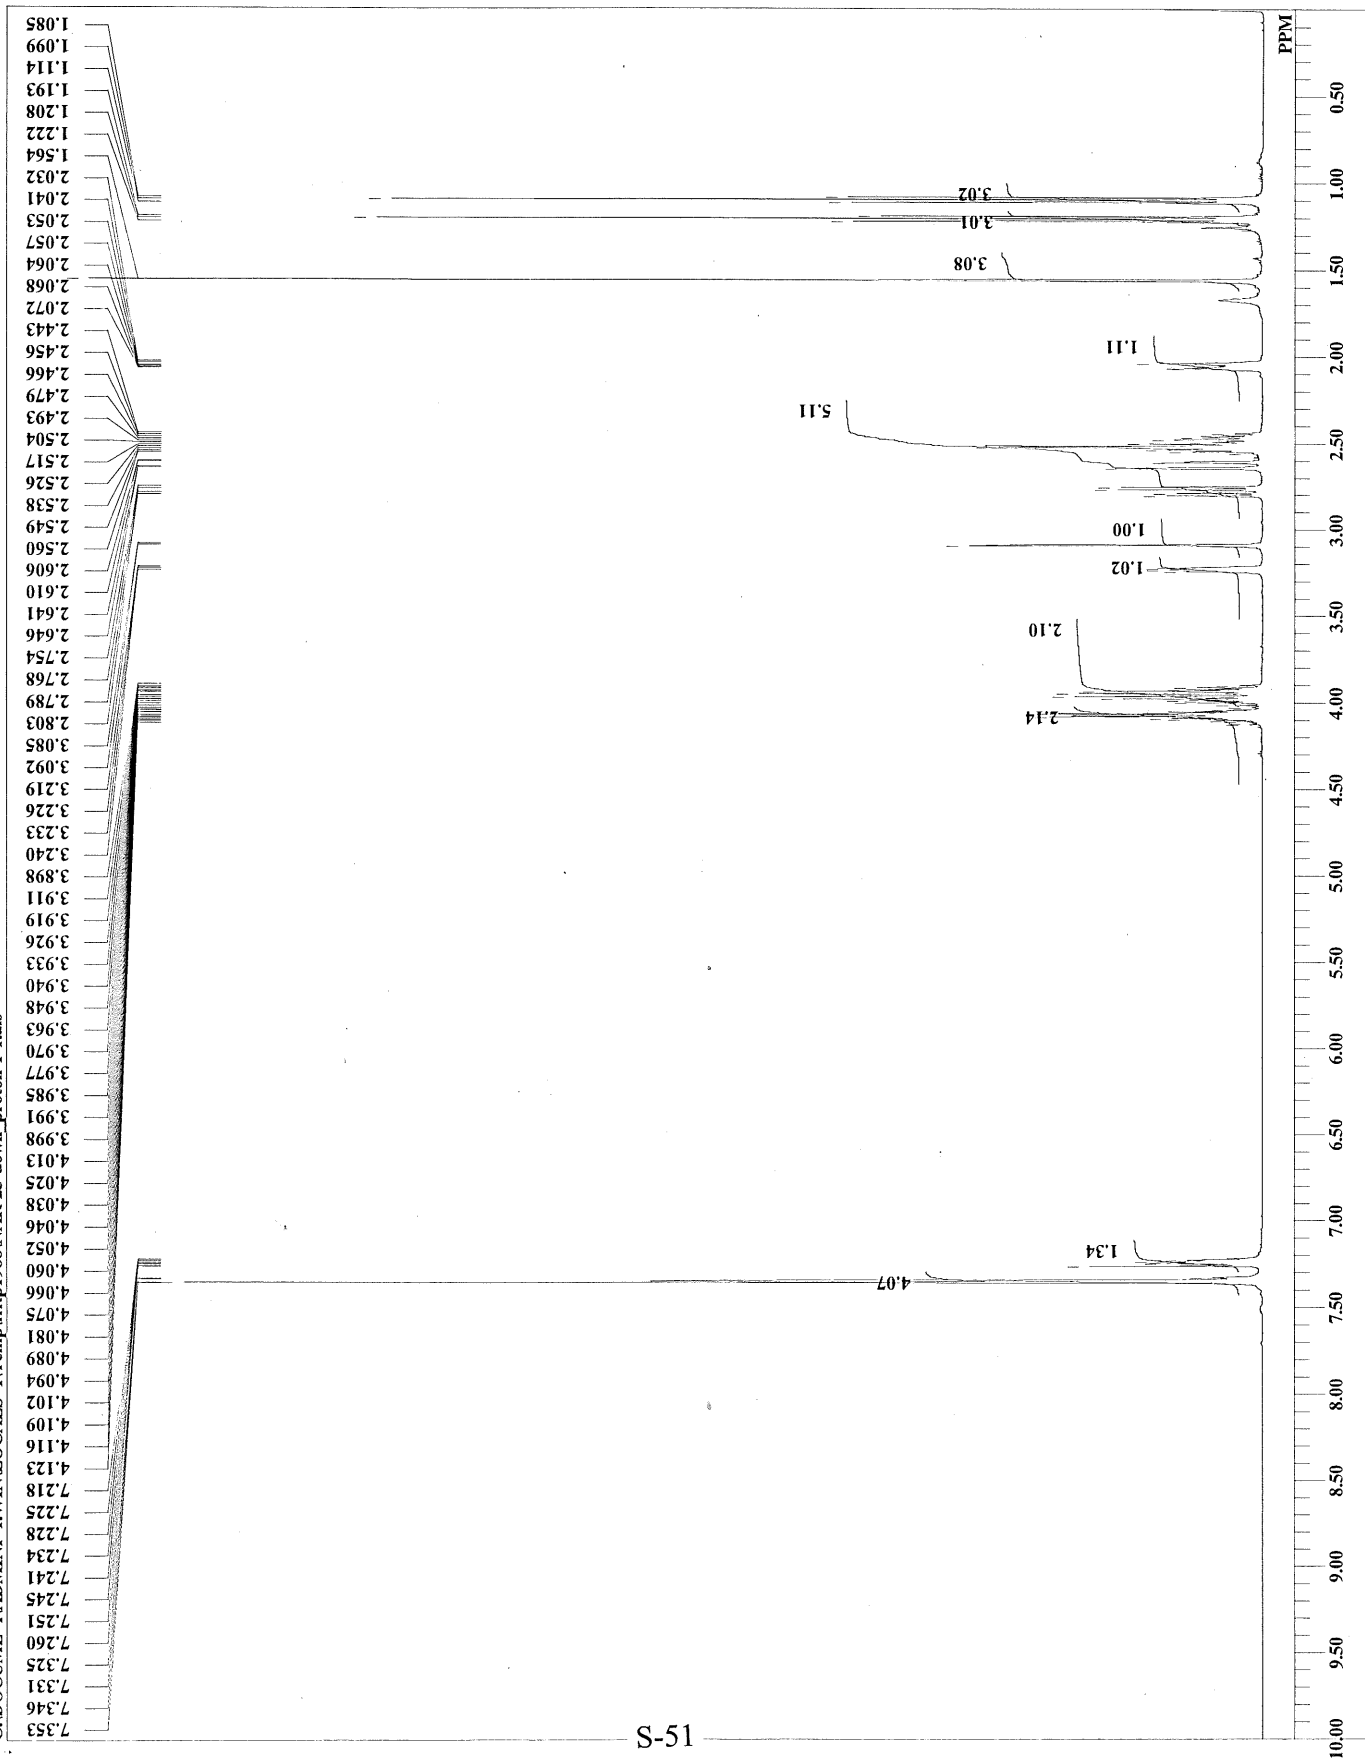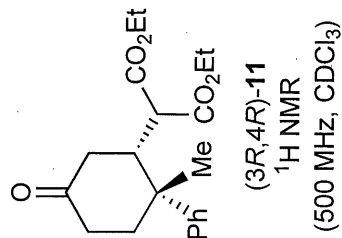

C:\DOCUME-1\ADMINI-1\WINLOCALS-1\Temp\ffftp1988\NAR-25-down Carbon-1-1.jdf

DFILE  
COMNT  
DATIM  
OBNUC  
EXMOD  
OBFRO  
OBSET  
OBFIN  
POINT  
FREQU  
SCANS  
ACQTM  
PD  
PW1  
IRNUC  
CTEMP  
SLVNT  
EXREF  
BF  
RGAIN

NAR-25-down Carbon-1-1.jdf  
single pulse decoupled gated NOE  
2012-08-25 13:10:12  
13C  
carbon.jpg  
125.77 MHz  
7.87 KHz  
4.21 Hz  
32780  
39308.18 Hz  
256  
0.8336 sec  
2.0000 sec  
2.72 usec  
1H  
22.9 c  
CDCL3  
77.00 ppm  
0.12 Hz  
58

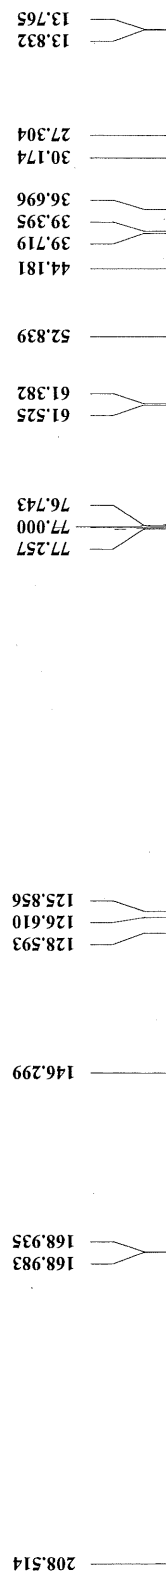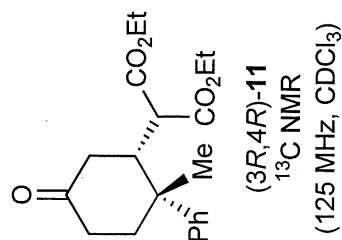

Supplement: c4ob00733f1.pdf [file c4ob00733f1.pdf]
